# Supplementary material for: Divergent α-functionalization of cyclic amines via ring construction by molecular O2 oxidized dearomatization and ring deconstruction by aromatization-driven C–C σ-bond cleavage
Source: Royal Society of Chemistry journal article supplement (doi:10.1039/d1gc00941a), 2021-01-01

## Supporting Information

### **Divergent $\alpha$ -functionalization of cyclic amines via ring construction by molecular O<sub>2</sub> oxidized dearomatization and ring deconstruction by aromatization driven C-C $\sigma$ -bond cleavage**

Fangzhi Hu,<sup>a,§</sup> Liang Wang,<sup>a,b,§</sup> Chunyan Ge,<sup>a</sup> Xinyao Li,<sup>a</sup> Zhanshuai Ding,<sup>a</sup> Lubin Xu,<sup>a</sup> Shuai-Shuai Li<sup>\*a,b</sup>

<sup>a</sup> College of Chemistry and Pharmaceutical Sciences, Qingdao Agricultural University, Qingdao 266109, China.

<sup>b</sup> College of Chemistry and Molecular Engineering, Qingdao University of Science and Technology, Qingdao 266042, China.

<sup>§</sup> These authors contributed equally.

### Table of Contents

|                                                             |            |
|-------------------------------------------------------------|------------|
| <b>1. General Information.....</b>                          | <b>S2</b>  |
| <b>2. General Procedure.....</b>                            | <b>S2</b>  |
| <b>3. Mechanistic Studies.....</b>                          | <b>S5</b>  |
| <b>4. Characterization of Products.....</b>                 | <b>S9</b>  |
| <b>5. Crystal Structure and Data .....</b>                  | <b>S31</b> |
| <b>6. <sup>1</sup>H and <sup>13</sup>C NMR Spectra.....</b> | <b>S34</b> |

## 1. General Information

Unless otherwise noted, all reagents and solvents were purchased from the commercial sources and used as received. Thin layer chromatography (TLC) was used to monitor the reaction on Merck 60 F254 precoated silica gel plate (0.2 mm thickness). TLC spots were visualized by UV-light irradiation on Spectroline Model ENF-24061/F 254 nm. The products were purified by flash column chromatography (200-300 mesh silica gel) eluted with the gradient of petroleum ether and ethyl acetate. Proton nuclear magnetic resonance spectra ( $^1\text{H}$  NMR) were recorded on a Bruker 500 MHz NMR spectrometer ( $\text{CDCl}_3$  or  $\text{DMSO-d}_6$  solvent). The chemical shifts were reported in parts per million (ppm), downfield from  $\text{SiMe}_4$  ( $\delta$  0.0) and relative to the signal of chloroform-d ( $\delta$  7.26, singlet) or dimethyl sulfoxide-d<sub>6</sub> ( $\delta$  2.54, singlet). Multiplicities were afforded as: s (singlet); d (doublet); t (triplet); q (quartet); dd (doublets of doublet) or m (multiplets). The number of protons for a given resonance is indicated by nH. Coupling constants were reported as a  $J$  value in Hz. Carbon nuclear magnetic resonance spectra ( $^{13}\text{C}$  NMR) was referenced to the appropriate residual solvent peak. High resolution mass spectral analysis (HRMS) was performed on Waters XEVO G2 Q-TOF. All substituted 2-fluorobenzaldehydes and phenols were purchased from adamas-beta. All *o*-aminobenzaldehydes were prepared according to literature.<sup>1</sup>

## 2. General Procedure

### 2.1 General Procedure for Preparation of the Starting Materials 1<sup>[2]</sup>

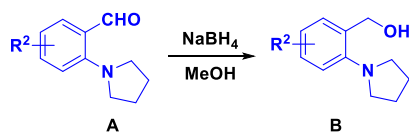

A round-bottom flask was charged with *o*-aminobenzaldehyde **A** (2 mmol) and MeOH (10 mL).  $\text{NaBH}_4$  (6 mmol) was added slowly to the mixture. The mixture was stirred at room temperature under an air atmosphere. Upon completion of the reaction as indicated by TLC analysis,  $\text{H}_2\text{O}$  (10 mL) was added dropwise to the system at 0 °C and the resulting solution was extracted with EtOAc (20 mL $\times$ 3). The combined organic extracts were dried with anhydrous  $\text{Na}_2\text{SO}_4$  and concentrated in vacuo. The residue could be used directly in the next step without needing purification.

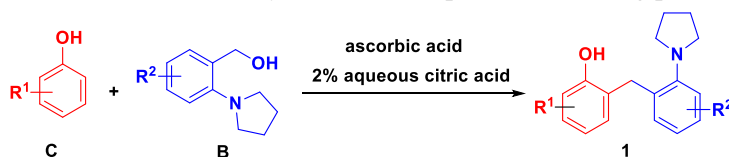

**Method A:** A suspension of phenol **C** (2.2 mmol) and alcohol **B** (2.0 mmol) in 2% aqueous citric acid (10 ml) containing ascorbic acid (100 mg, 0.56 mmol) was heated under reflux for over 15 hrs. Upon completion of the reaction as indicated by TLC analysis, the resulting solution was extracted with EtOAc (20 mL $\times$ 3). The combined organic extracts were dried with anhydrous  $\text{Na}_2\text{SO}_4$  and concentrated in vacuo. The residue was recrystallized with ethyl acetate/petroleum ether for three times to obtained the pure diarylmethane **1**.

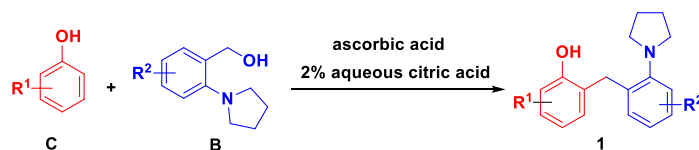

**Method B:** A suspension of phenol **C** (2.2 mmol) and alcohol **B** (2.0 mmol) in 2% aqueous citric acid (10 ml) containing ascorbic acid (100 mg, 0.56 mmol) was heated under reflux for over 15 hrs. Upon completion of the reaction as indicated by TLC analysis, the resulting solution was extracted with EtOAc (20 mL×3). The combined organic extracts were dried with anhydrous Na<sub>2</sub>SO<sub>4</sub> and concentrated in vacuo. The residue was purified by flash column chromatography on silica gel (eluent: ethyl acetate/petroleum ether, 1:200) to afford the desired diarylmethane **1**.

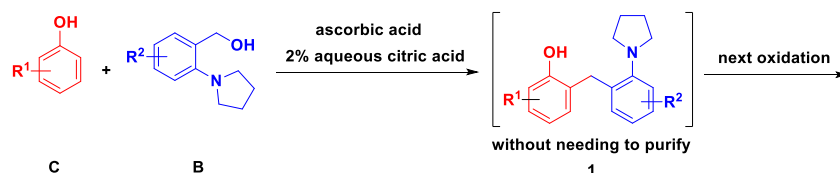

**Method C:** A suspension of phenol **C** (2.2 mmol) and alcohol **B** (2.0 mmol) in 2% aqueous citric acid (10 ml) containing ascorbic acid (100 mg, 0.56 mmol) was heated under reflux for over 15 hrs. Upon completion of the reaction as indicated by TLC analysis, the resulting solution was washed with NaHCO<sub>3</sub> (10 mL×2), and extracted with EtOAc (20 mL×3). The combined organic extracts were dried with anhydrous Na<sub>2</sub>SO<sub>4</sub> and concentrated in vacuo. The residue could be used directly in the next oxidation without needing purification. However, the product was difficult to isolate which mixed with the impurity from the first step.

## 2.2 General Procedure for Construction of the $\alpha$ - and $\alpha,\alpha'$ -C(sp<sup>3</sup>)-H Bond Functionalized Polycyclic Amines **2** or **4**

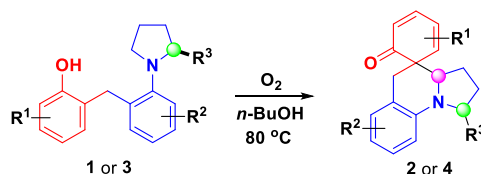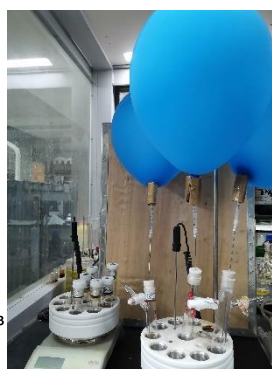

A Shrek tube was charged with diarylmethane **1** or **3** (0.1 mmol) and *n*-BuOH (2.0 mL) under an O<sub>2</sub> atmosphere with an O<sub>2</sub> balloon. The mixture was stirred at 80 °C. Upon completion of the reaction as indicated by TLC analysis, the reaction mixture was concentrated in vacuo. The residue was purified by column chromatography on silica gel (eluent: ethyl acetate/petroleum ether, 1:8) to afford the pure product **2** or **4**.

## 2.3 General Procedure for Synthesis of $\alpha$ -C(sp<sup>3</sup>)-H Functionalized Cyclic Anilines **3**

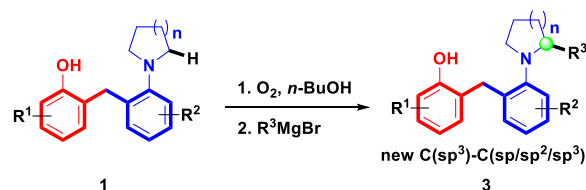

A Shrek tube was charged with diarylmethane **1** (0.1 mmol) and *n*-BuOH (2.0 mL) under an O<sub>2</sub>

atmosphere with an O<sub>2</sub> balloon. The mixture was stirred at 80 °C. Upon completion of the reaction as indicated by TLC analysis, the H<sub>2</sub>O (2 mL) was added to the system and the resulting solution was extracted with DCM (3 mL×3). The combined organic extracts were dried with anhydrous Na<sub>2</sub>SO<sub>4</sub> and concentrated in vacuo, and the residue was directly used for next operation. The Shrek tube with the residue was charged with Et<sub>2</sub>O (2 mL) at 0 °C under N<sub>2</sub> atmosphere. Then Grignard reagent (0.4 mmol) was added dropwise in the mixture, and the mixture was stirred at 0 °C continually. Upon completion of the reaction as indicated by TLC analysis, the H<sub>2</sub>O (2 mL) was added dropwise to the system at 0 °C and the resulting solution was extracted with EtOAc (3 mL×3). The combined organic extracts were dried with anhydrous Na<sub>2</sub>SO<sub>4</sub> and concentrated in vacuo. The residue was purified by column chromatography on silica gel (eluent: ethyl acetate/petroleum ether, 1:200) to afford the pure product **3**.

## 2.4 General Procedure for Synthesis of $\alpha$ -C(sp<sup>3</sup>)-H Bond Deuterated Cyclic Anilines **5**

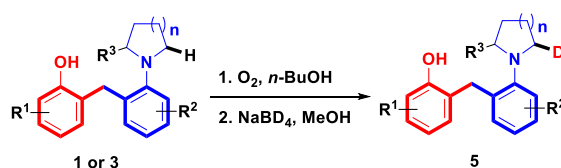

A Shrek tube was charged with diarylmethane **1** or **3** (0.1 mmol) and *n*-BuOH (2.0 mL) under an O<sub>2</sub> atmosphere with an O<sub>2</sub> balloon. The mixture was stirred at 80 °C. Upon completion of the reaction as indicated by TLC analysis, the H<sub>2</sub>O (2 mL) was added to the system and the resulting solution was extracted with DCM (3 mL×3). The combined organic extracts were dried with anhydrous Na<sub>2</sub>SO<sub>4</sub> and concentrated in vacuo, and the residue was directly used for next operation. The reaction tube with the residue was charged with NaBD<sub>4</sub> (3 equiv.) and MeOH (2 mL), and stirred at room temperature. Upon completion of the reaction as indicated by TLC analysis, the H<sub>2</sub>O (2 mL) was added dropwise to the system at 0 °C and the resulting solution was extracted with EtOAc (3 mL×3). The combined organic extracts were dried with anhydrous Na<sub>2</sub>SO<sub>4</sub> and concentrated in vacuo. The residue was purified by column chromatography on silica gel (eluent: ethyl acetate/petroleum ether, 1:200) to afford the pure product **5**.

## 2.5 General Procedure for Synthesis of $\alpha, \alpha'$ -Diallyl Substituted Aniline

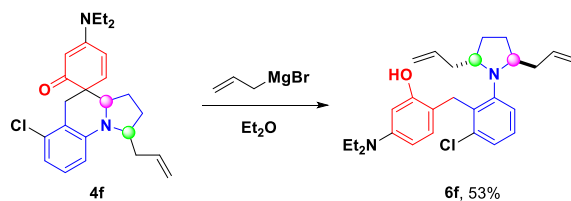

A reaction tube was charged with **4f** (0.05 mmol), Et<sub>2</sub>O (2 mL) at 0 °C under N<sub>2</sub> atmosphere. Then allyl magnesium bromide (0.2 mmol) was added in the mixture, and the mixture was stirred at 0 °C continually. Upon completion of the reaction as indicated by TLC analysis, the H<sub>2</sub>O (2 mL) was added dropwise to the system at 0 °C and the resulting solution was extracted with EtOAc (5 mL×3). The combined organic extracts were dried with anhydrous Na<sub>2</sub>SO<sub>4</sub> and concentrated in vacuo. The residue was purified by column chromatography on silica gel (eluent: ethyl acetate/petroleum ether, 1:200) to afford the pure  $\alpha, \alpha'$ -diallyl substituted aniline **6f** in 53% yield.

## 2.6 General Procedure for Sequential Operation for Achieving the $\alpha$ -C(sp<sup>3</sup>)-H Bond Functionalized Polycyclic Amine

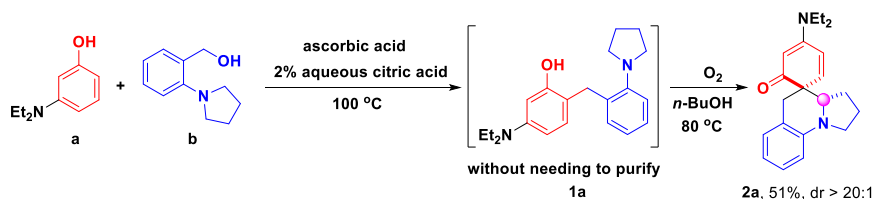

A suspension of phenol **a** (0.11 mmol) and alcohol **b** (0.1 mmol) in 2% aqueous citric acid (1 ml) containing ascorbic acid (5 mg) was heated under reflux for over 15 hrs. Upon completion of the reaction as indicated by TLC analysis, the resulting solution was washed with NaHCO<sub>3</sub> (3 mL×2), and extracted with EtOAc (3 mL×3). The combined organic extracts were dried with anhydrous Na<sub>2</sub>SO<sub>4</sub> and concentrated in vacuo. The residue could be used directly in the next oxidation without needing purification.

Subsequently, a Shrek tube was charged with the residue and *n*-BuOH (2.0 mL) under an O<sub>2</sub> atmosphere with an O<sub>2</sub> balloon. The mixture was stirred at 80 °C. Upon completion of the reaction as indicated by TLC analysis, the reaction mixture was concentrated in vacuo. The residue was purified by column chromatography on silica gel (eluent: ethyl acetate/petroleum ether, 1:8) to afford the pure product **2a**.

## 3. Mechanistic studies

### 3.1. General Procedure for the Preparation of Deuterated Diarylmethane

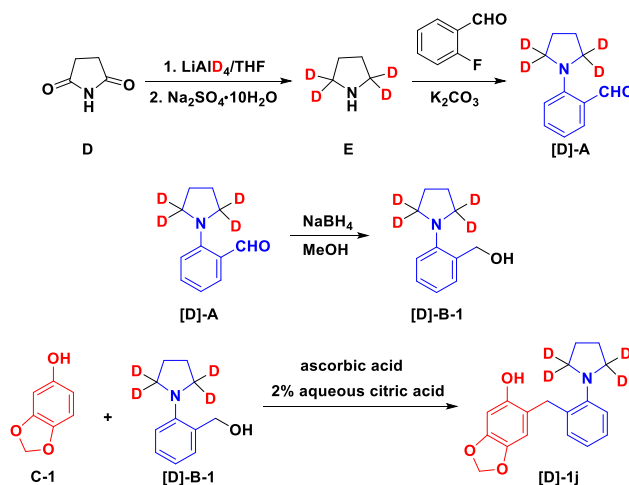

A thick-walled pressure tube was charged with succinimide **D** (0.5 mmol), THF (4 mL), and LiAlD<sub>4</sub> (2.0 mmol) at 90 °C. The reaction was stirred for 12 h at 90 °C, and was quenched with Na<sub>2</sub>SO<sub>4</sub>·10H<sub>2</sub>O (0.8 mmol). Then *o*-fluorobenzaldehyde (0.4 mmol) and K<sub>2</sub>CO<sub>3</sub> (0.6 mmol) were added in the mixture. The mixture was stirred for 12 h at 100 °C. The crude mixture was extracted with EtOAc (x3) and the combined organic extracts were washed with brine, dried (Na<sub>2</sub>SO<sub>4</sub>) and concentrated *in vacuo*. The crude mixture purified by flash silica gel chromatography (petroleum ether/ethyl acetate = 100:1) to afford the pure product **[D]-A**.

A reaction tube was charged with *o*-aminobenzaldehyde **[D]-A** (0.4 mmol) and MeOH (2 mL). NaBH<sub>4</sub> (1.2 mmol) was added slowly to the mixture. The mixture was stirred at room temperature under an air atmosphere. Upon completion of the reaction as indicated by TLC analysis, H<sub>2</sub>O (10

mL) was added dropwise to the system at 0 °C and the resulting solution was extracted with EtOAc (20 mL×3). The combined organic extracts were dried with anhydrous Na<sub>2</sub>SO<sub>4</sub> and concentrated in vacuo. The residue could be used directly in the next step without needing purifying.

A suspension of sesamol **C-1** (0.44 mmol) and alcohol **[D]-B-1** (0.4 mmol) in 2% aqueous citric acid (2 ml) containing ascorbic acid (20 mg, 0.112 mmol) was heated under reflux for over 15 hrs. Upon completion of the reaction as indicated by TLC analysis, the resulting solution was extracted with EtOAc (5 mL×3). The combined organic extracts were dried with anhydrous Na<sub>2</sub>SO<sub>4</sub> and concentrated in vacuo. The residue was purified by flash column chromatography on silica gel (eluent: ethyl acetate/petroleum ether, 1:200) to afford the deuterated diarylmethane **[D]-1j** in 55% yield.

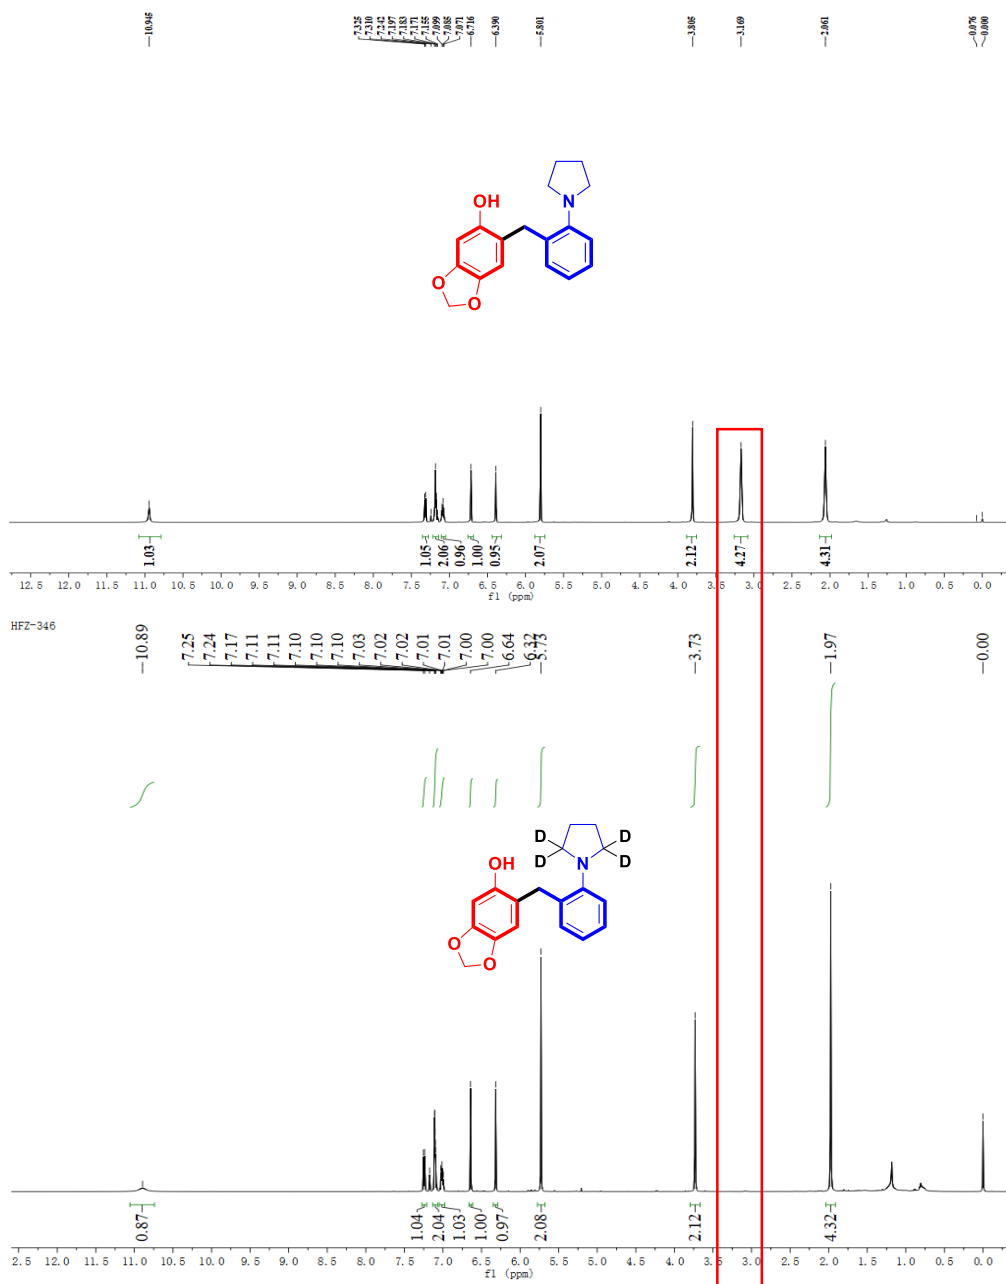

### 3.2 Spectra Contrast between Deuterated Product and Non-deuterated Product.

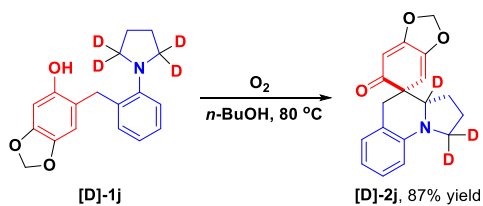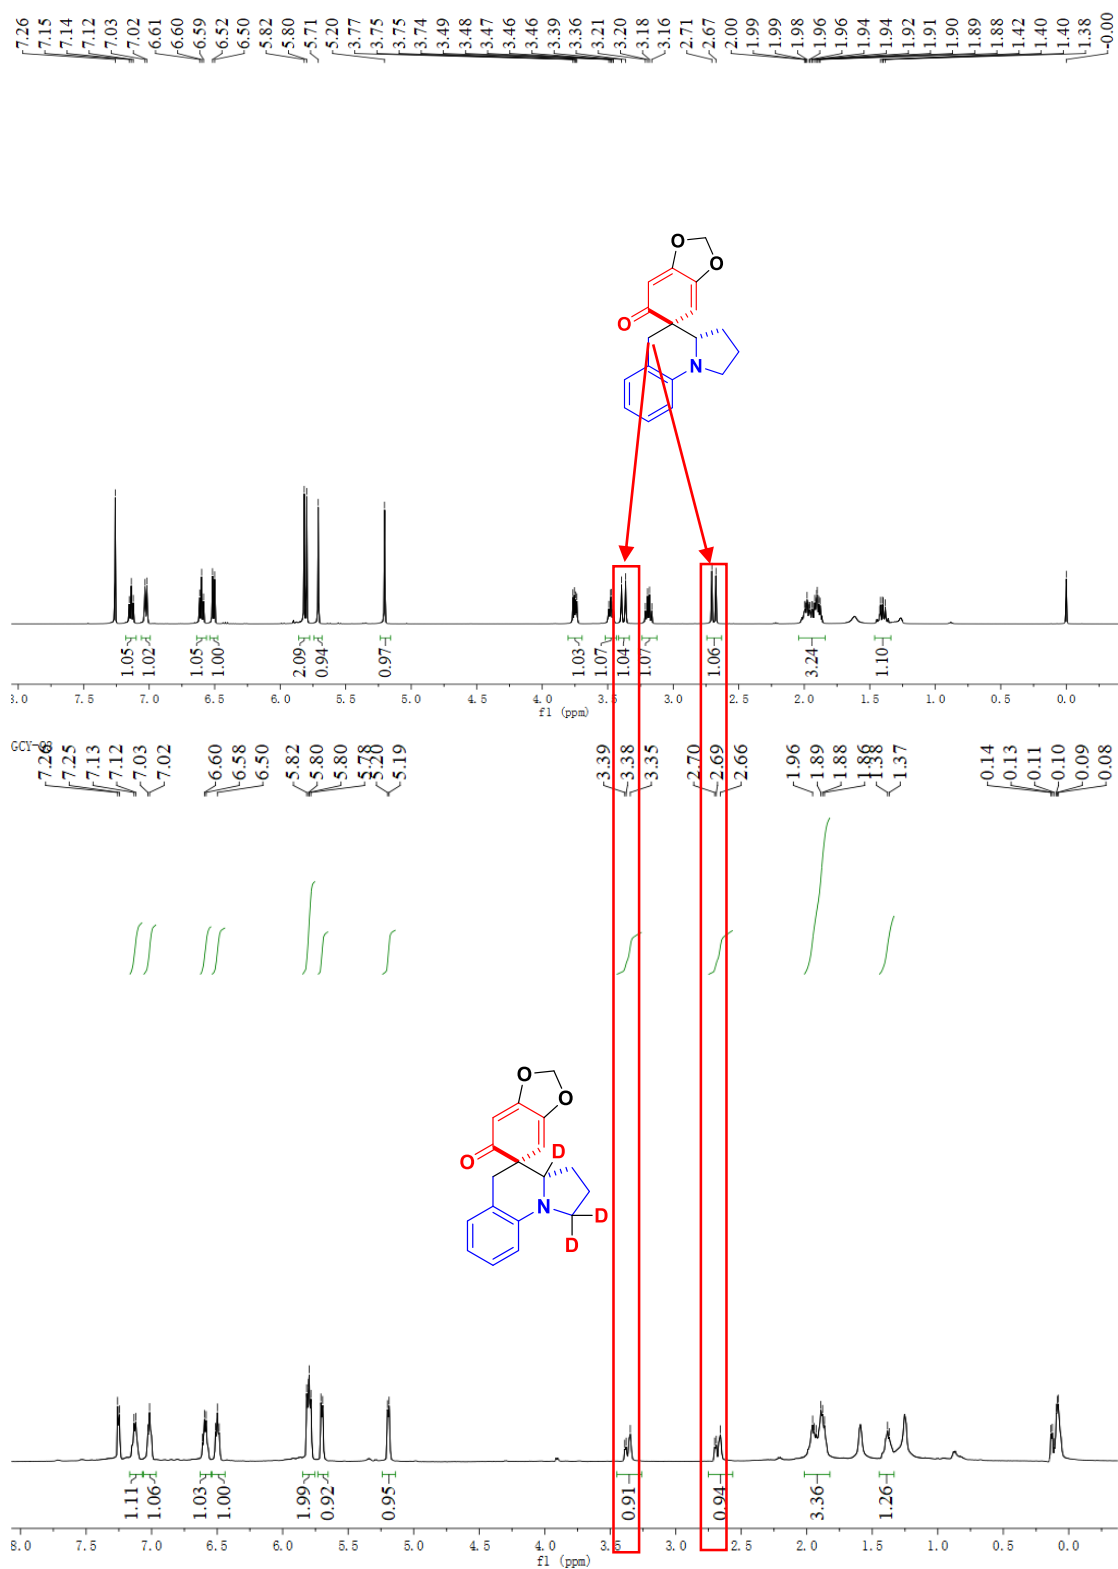

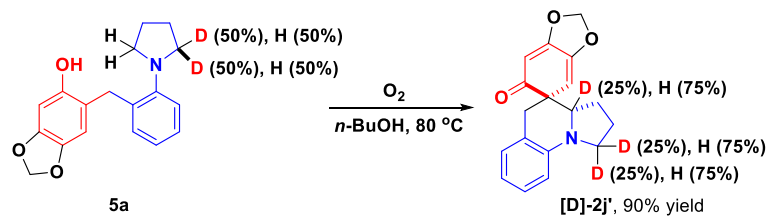

Loss of deuteration

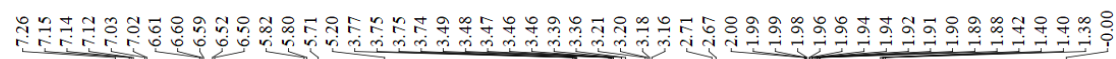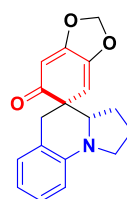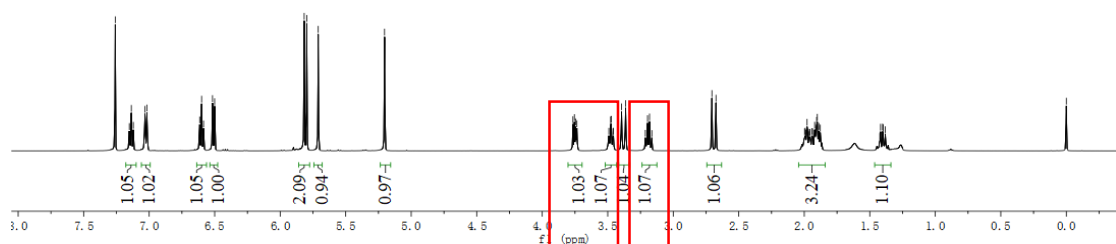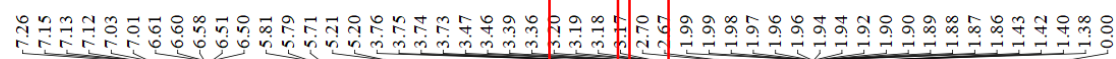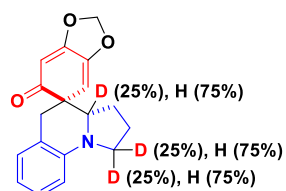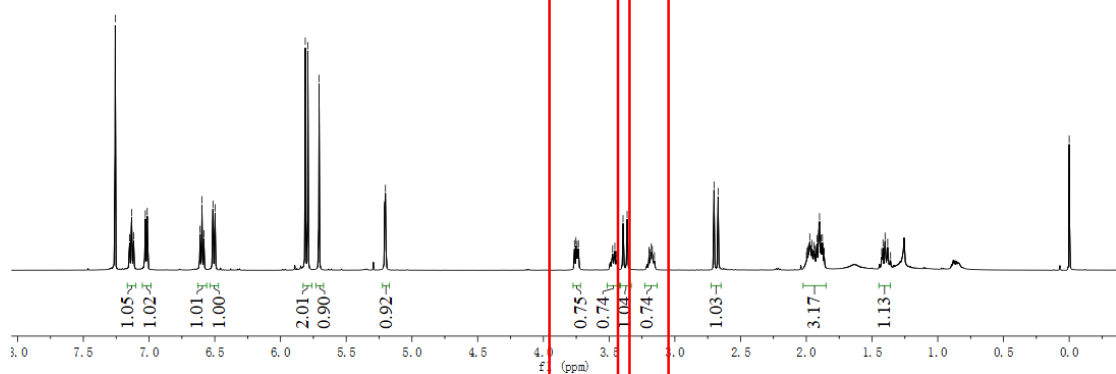



### 3.3 Aromatization-driven C-C Bond Cleavage of Spiroindolenine.

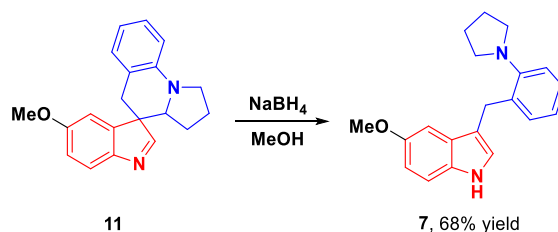

The reaction tube was charged with spiroindolenine **11** (0.1 mmol),  $\text{NaBH}_4$  (0.3 mmol, 3 equiv.) and  $\text{MeOH}$  (2 mL), and stirred at room temperature. Upon completion of the reaction as indicated by TLC analysis, the  $\text{H}_2\text{O}$  (2 mL) was added dropwise to the system at 0 °C and the resulting solution was extracted with  $\text{EtOAc}$  (5 mL $\times$ 3). The combined organic extracts were dried with anhydrous  $\text{Na}_2\text{SO}_4$  and concentrated in vacuo. The residue was purified by column chromatography on silica gel (eluent: ethyl acetate/petroleum ether, 1:50) to afford the pure product **7**.

### 3.4 Nucleophilic Addition between Grignard Reagent and the Imine of Spiroindolenine

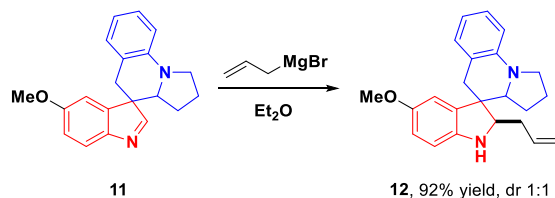

A reaction tube was charged with spiroindolenine **11** (0.05 mmol),  $\text{Et}_2\text{O}$  (2 mL) at 0 °C under  $\text{N}_2$  atmosphere. Then allyl magnesium bromide (0.2 mmol) was added in the mixture, and the mixture was stirred at 0 °C continually. Upon completion of the reaction as indicated by TLC analysis, the  $\text{H}_2\text{O}$  (2 mL) was added dropwise to the system at 0 °C and the resulting solution was extracted with  $\text{EtOAc}$  (5 mL $\times$ 3). The combined organic extracts were dried with anhydrous  $\text{Na}_2\text{SO}_4$  and concentrated in vacuo. The residue was purified by column chromatography on silica gel (eluent: ethyl acetate/petroleum ether, 1:50) to afford the pure addition-compound **12** in 92% yield (dr 1:1).

## 4. Characterization of Products

### 5-(diethylamino)-2-(2-(pyrrolidin-1-yl)benzyl)phenol (**1a**)

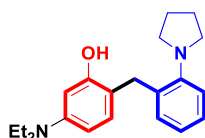

Flash column chromatography on a silica gel (ethyl acetate: petroleum ether, 1:20) gave the product (401 mg, 62% yield) as a white solid.

**$^1\text{H}$  NMR** (500 MHz,  $\text{CDCl}_3$ )  $\delta$  10.88 (s, 1H), 7.33 (d,  $J$  = 7.5 Hz, 1H), 7.21 – 7.09 (m, 2H), 7.06 (dd,  $J$  = 7.5, 4.6 Hz, 2H), 6.18 (s, 1H), 6.15 (d,  $J$  = 8.4 Hz, 1H), 3.80 (s, 2H), 3.26 (q,  $J$  = 7.0 Hz, 4H), 3.19 (s, 4H), 2.07 (s, 4H), 1.10 (t,  $J$  = 7.0 Hz, 6H);  **$^{13}\text{C}$  NMR** (125 MHz,  $\text{CDCl}_3$ )  $\delta$  156.3, 148.3, 146.1, 137.9, 130.9, 130.3, 127.2, 125.8, 119.8, 115.2, 103.8, 100.1, 53.8, 44.3, 33.3, 23.8, 12.7. **HRMS (ESI)  $m/z$** :  $[\text{M}+\text{H}]^+$  calcd for  $\text{C}_{21}\text{H}_{29}\text{N}_2\text{O}$  325.2274, found: 325.2267.

### 5-(diethylamino)-2-(4-methyl-2-(pyrrolidin-1-yl)benzyl)phenol (**1b**)

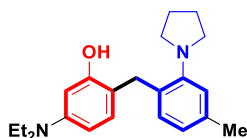

Flash column chromatography on a silica gel (ethyl acetate: petroleum ether, 1:20) gave the product (392 mg, 58% yield) as a white solid.

**<sup>1</sup>H NMR** (500 MHz, CDCl<sub>3</sub>) δ 10.86 (s, 1H), 7.21 (d, *J* = 7.7 Hz, 1H), 7.04 (d, *J* = 8.3 Hz, 1H), 6.97 (s, 1H), 6.87 (d, *J* = 7.7 Hz, 1H), 6.18 (d, *J* = 2.2 Hz, 1H), 6.14 (dd, *J* = 8.3, 2.0 Hz, 1H), 3.76 (s, 2H), 3.25 (q, *J* = 7.0 Hz, 4H), 3.17 (t, *J* = 6.0 Hz, 4H), 2.26 (s, 3H), 2.11 – 2.01 (m, 4H), 1.09 (t, *J* = 7.0 Hz, 6H); **<sup>13</sup>C NMR** (125 MHz, CDCl<sub>3</sub>) δ 156.3, 148.3, 145.8, 136.9, 134.8, 130.8, 130.3, 126.5, 120.4, 115.6, 103.9, 100.2, 53.8, 44.4, 32.9, 23.8, 21.2, 12.7. **HRMS (ESI) m/z:** [M+H]<sup>+</sup> calcd for C<sub>22</sub>H<sub>31</sub>N<sub>2</sub>O 339.2431, found: 339.2422.

### 2-(5-chloro-2-(pyrrolidin-1-yl)benzyl)-5-(diethylamino)phenol (1c)

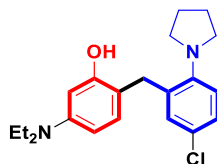

Flash column chromatography on a silica gel (ethyl acetate: petroleum ether, 1:20) gave the product (393 mg, 55% yield) as a white solid.

**<sup>1</sup>H NMR** (500 MHz, CDCl<sub>3</sub>) δ 10.57 (s, 1H), 7.29 (s, 1H), 7.09 (s, 2H), 7.04 (d, *J* = 8.2 Hz, 1H), 6.17 (d, *J* = 10.6 Hz, 2H), 3.76 (s, 2H), 3.26 (q, *J* = 7.0 Hz, 4H), 3.15 (t, *J* = 5.7 Hz, 4H), 2.07 (dt, *J* = 6.2, 3.1 Hz, 4H), 1.10 (t, *J* = 7.0 Hz, 6H); **<sup>13</sup>C NMR** (125 MHz, CDCl<sub>3</sub>) δ 156.3, 148.5, 144.7, 139.7, 130.8, 130.7, 130.4, 127.2, 121.8, 114.2, 103.9, 99.9, 53.9, 44.3, 33.0, 23.8, 12.7. **HRMS (ESI) m/z:** [M+H]<sup>+</sup> calcd for C<sub>21</sub>H<sub>28</sub>ClN<sub>2</sub>O 359.1885, found: 359.1877.

### 5-(diethylamino)-2-(5-methoxy-2-(pyrrolidin-1-yl)benzyl)phenol (1d)

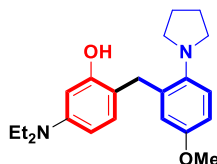

Flash column chromatography on a silica gel (ethyl acetate: petroleum ether, 1:20) gave the product (438 mg, 62% yield) as a white solid.

**<sup>1</sup>H NMR** (500 MHz, CDCl<sub>3</sub>) δ 11.09 (s, 1H), 7.10 (d, *J* = 8.8 Hz, 1H), 7.05 (d, *J* = 8.4 Hz, 1H), 6.87 (d, *J* = 3.0 Hz, 1H), 6.67 (dd, *J* = 8.8, 3.0 Hz, 1H), 6.19 (d, *J* = 2.5 Hz, 1H), 6.15 (dd, *J* = 8.4, 2.5 Hz, 1H), 3.76 (s, 2H), 3.75 (s, 3H), 3.26 (q, *J* = 7.0 Hz, 4H), 3.18 – 3.08 (m, 4H), 2.10 – 2.02 (m, 4H), 1.10 (t, *J* = 7.0 Hz, 6H); **<sup>13</sup>C NMR** (125 MHz, CDCl<sub>3</sub>) δ 157.2, 156.4, 148.4, 139.4, 139.1, 130.3, 120.9, 116.1, 114.9, 112.2, 103.8, 100.1, 55.4, 54.2, 44.4, 33.4, 23.8, 12.7. **HRMS (ESI) m/z:** [M+H]<sup>+</sup> calcd for C<sub>22</sub>H<sub>31</sub>N<sub>2</sub>O<sub>2</sub> 355.2380, found: 355.2369.

### 5-(diethylamino)-2-(2-fluoro-6-(pyrrolidin-1-yl)benzyl)phenol (1e)

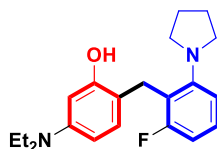

Flash column chromatography on a silica gel (ethyl acetate: petroleum ether, 1:20) gave the product (410 mg, 60% yield) as a white solid.

**<sup>1</sup>H NMR** (500 MHz, CDCl<sub>3</sub>) δ 10.59 (s, 1H), 7.18 (dd, *J* = 8.2, 2.4 Hz, 1H), 7.14 – 7.05 (m, 1H), 6.96 (d, *J* = 8.1 Hz, 1H), 6.82 (t, *J* = 8.8 Hz, 1H), 6.22 – 6.12 (m, 2H), 3.85 (d, *J* = 2.1 Hz, 2H), 3.26 (q, *J* = 7.0 Hz, 4H), 3.22–3.13 (m, 4H), 2.07 (dt, *J* = 6.1, 3.2 Hz, 4H), 1.10 (t, *J* = 7.0 Hz, 6H); **<sup>13</sup>C NMR** (125 MHz, CDCl<sub>3</sub>) δ 163.1, 161.1, 156.5, 148.3, 148.2, 148.1, 131.5, 127.5, 127.5, 125.3, 125.2, 115.4, 115.4, 113.2, 112.8, 112.6, 103.7, 99.7, 53.9, 44.3, 25.1, 23.8, 12.7. **HRMS (ESI) m/z**: [M+H]<sup>+</sup> calcd for C<sub>21</sub>H<sub>28</sub>FN<sub>2</sub>O 343.2180, found: 343.2167.

### 2-(2-chloro-6-(pyrrolidin-1-yl)benzyl)-5-(diethylamino)phenol (1f)

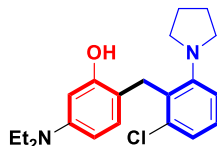

Flash column chromatography on a silica gel (ethyl acetate: petroleum ether, 1:20) gave the product (379 mg, 53% yield) as a white solid.

**<sup>1</sup>H NMR** (500 MHz, CDCl<sub>3</sub>) δ 10.90 (s, 1H), 7.43 (d, *J* = 8.1 Hz, 1H), 7.16 (dd, *J* = 7.7, 1.0 Hz, 1H), 7.11 (d, *J* = 6.9 Hz, 1H), 7.06 (t, *J* = 7.9 Hz, 1H), 6.22–6.13 (m, 2H), 4.01 (s, 2H), 3.27 (q, *J* = 7.0 Hz, 4H), 3.22–3.11 (m, 4H), 2.13 – 2.00 (m, 4H), 1.10 (t, *J* = 7.0 Hz, 6H); **<sup>13</sup>C NMR** (125 MHz, CDCl<sub>3</sub>) δ 156.9, 148.4, 148.3, 135.9, 135.2, 132.4, 127.6, 127.3, 118.5, 112.4, 103.6, 99.5, 54.1, 44.3, 29.1, 23.8, 12.7. **HRMS (ESI) m/z**: [M+H]<sup>+</sup> calcd for C<sub>21</sub>H<sub>28</sub>ClN<sub>2</sub>O 359.1885, found: 359.1879.

### 2-(2-bromo-6-(pyrrolidin-1-yl)benzyl)-5-(diethylamino)phenol (1g)

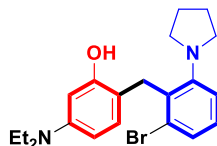

Flash column chromatography on a silica gel (ethyl acetate: petroleum ether, 1:20) gave the product (434 mg, 54% yield) as a white solid.

**<sup>1</sup>H NMR** (500 MHz, CDCl<sub>3</sub>) δ 10.97 (s, 1H), 7.57 (d, *J* = 8.0 Hz, 1H), 7.37 (dd, *J* = 7.9, 0.9 Hz, 1H), 7.16 (dd, *J* = 8.0, 0.7 Hz, 1H), 7.00 (t, *J* = 8.0 Hz, 1H), 6.21 – 6.13 (m, 2H), 4.06 (s, 2H), 3.27 (q, *J* = 7.0 Hz, 4H), 3.18 (s, 4H), 2.13 – 2.03 (m, 4H), 1.11 (t, *J* = 7.0 Hz, 6H); **<sup>13</sup>C NMR** (125 MHz, CDCl<sub>3</sub>) δ 156.9, 148.4, 148.4, 136.7, 132.6, 130.8, 128.0, 126.7, 119.3, 112.4, 103.2, 99.6, 54.1, 44.3, 31.5, 23.8, 12.8. **HRMS (ESI) m/z**: [M+H]<sup>+</sup> calcd for C<sub>21</sub>H<sub>28</sub>BrN<sub>2</sub>O 403.1380, found: 403.1371.

### 5-(diethylamino)-2-(2-((3aR,7aS)-octahydro-2H-isoindol-2-yl)benzyl)phenol (1h)

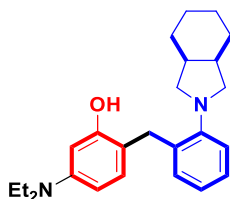

Flash column chromatography on a silica gel (ethyl acetate: petroleum ether, 1:20) gave the product (378 mg, 50% yield) as a white solid.

**<sup>1</sup>H NMR** (500 MHz, CDCl<sub>3</sub>) δ 10.96 (d, *J* = 165.2 Hz, 1H), 7.33 – 7.27 (m, 1H), 7.20 (dd, *J* = 23.8, 8.0 Hz, 1H), 7.15 – 7.09 (m, 1H), 7.08 – 6.98 (m, 2H), 6.24 – 6.18 (m, 1H), 6.14 (d, *J* = 8.3 Hz, 1H), 3.89 (d, *J* = 14.1 Hz, 1H), 3.79 (s, 1H), 3.68 (d, *J* = 14.1 Hz, 1H), 3.42 (dd, *J* = 9.8, 6.6 Hz, 1H), 3.32 – 3.16 (m, 7H), 2.47 – 2.37 (m, 1H), 1.95 (d, *J* = 12.1 Hz, 1H), 1.84 (d, *J* = 8.9 Hz, 1H), 1.78 – 1.71 (m, 1H), 1.69–1.67 (m, 1H), 1.66 – 1.56 (m, 2H), 1.46 – 1.37 (m, 1H), 1.33 (t, *J* = 9.6 Hz, 1H), 1.25 – 1.16 (m, 1H), 1.09 (t, *J* = 7.0 Hz, 6H); **<sup>13</sup>C NMR** (125 MHz, CDCl<sub>3</sub>) δ 156.3, 148.5, 148.2, 137.6, 137.3, 131.1, 131.0, 130.4, 130.3, 127.2, 127.2, 125.1, 125.1, 120.2, 119.9, 115.6, 115.4, 103.8, 100.3, 100.1, 59.1, 57.7, 45.2, 44.4, 37.8, 34.1, 33.8, 28.9, 26.3, 25.7, 22.9, 12.7. **HRMS (ESI) m/z**: [M+H]<sup>+</sup> calcd for C<sub>25</sub>H<sub>35</sub>N<sub>2</sub>O 379.2744, found: 379.2733.

#### 5-(pyrrolidin-1-yl)-2-(2-(pyrrolidin-1-yl)benzyl)phenol (1i)

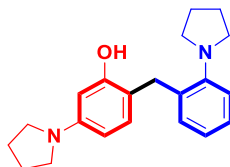

Flash column chromatography on a silica gel (ethyl acetate: petroleum ether, 1:20) gave the product (386 mg, 60% yield) as a white solid.

**<sup>1</sup>H NMR** (500 MHz, CDCl<sub>3</sub>) δ 10.90 (s, 1H), 7.33 (d, *J* = 7.4 Hz, 1H), 7.20 – 7.10 (m, 2H), 7.10 – 7.01 (m, 2H), 6.08 (s, 1H), 6.05 (d, *J* = 8.2 Hz, 1H), 3.82 (s, 2H), 3.19 (s, 8H), 2.07 (s, 4H), 1.92 (s, 4H); **<sup>13</sup>C NMR** (125 MHz, CDCl<sub>3</sub>) δ 156.2, 148.5, 146.0, 137.9, 130.9, 130.2, 127.2, 125.8, 119.8, 115.4, 103.7, 100.1, 53.9, 47.7, 33.3, 25.5, 23.8. **HRMS (ESI) m/z**: [M+H]<sup>+</sup> calcd for C<sub>21</sub>H<sub>27</sub>N<sub>2</sub>O 323.2118, found: 323.2110.

#### 6-(2-(pyrrolidin-1-yl)benzyl)benzo[d][1,3]dioxol-5-ol (1j)

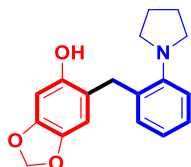

Flash column chromatography on a silica gel (ethyl acetate: petroleum ether, 1:10) gave the product (326 mg, 55% yield) as a yellow solid.

**<sup>1</sup>H NMR** (500 MHz, CDCl<sub>3</sub>) δ 10.94 (s, 1H), 7.32 (d, *J* = 7.5 Hz, 1H), 7.18 (t, *J* = 6.4 Hz, 2H), 7.08 (t, *J* = 7.0 Hz, 1H), 6.72 (s, 1H), 6.39 (s, 1H), 5.80 (s, 2H), 3.81 (s, 2H), 3.17 (s, 4H), 2.06 (s, 4H); **<sup>13</sup>C NMR** (125 MHz, CDCl<sub>3</sub>) δ 150.3, 146.9, 146.3, 140.4, 137.4, 130.7, 127.6, 125.9, 120.2, 119.3, 108.7, 100.7, 99.1, 54.1, 33.8, 23.8. **HRMS (ESI) m/z**: [M+H]<sup>+</sup> calcd for C<sub>18</sub>H<sub>19</sub>NO<sub>3</sub> 298.1438, found: 298.1430.

**4-(diethylamino)-1',2',3',3a'-tetrahydro-5'H-spiro[cyclohexane-1,4'-pyrrolo[1,2-a]quinoline]-2,4-dien-6-one (2a)**<sup>[3]</sup>

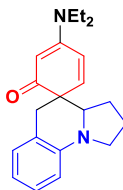

Flash column chromatography on a silica gel (ethyl acetate: petroleum ether, 1:8) gave the product (26.4 mg, 82% yield) as a yellow solid.

**<sup>1</sup>H NMR** (500 MHz, CDCl<sub>3</sub>) δ 7.12 (t, *J* = 7.6 Hz, 1H), 7.03 (d, *J* = 7.3 Hz, 1H), 6.58 (t, *J* = 7.3 Hz, 1H), 6.50 (d, *J* = 8.1 Hz, 1H), 6.39 (dd, *J* = 10.5, 2.2 Hz, 1H), 6.16 (d, *J* = 10.5 Hz, 1H), 5.33 (d, *J* = 2.1 Hz, 1H), 3.86 (dd, *J* = 9.9, 5.1 Hz, 1H), 3.54 – 3.43 (m, 2H), 3.37 (q, *J* = 7.1 Hz, 4H), 3.18 (d, *J* = 7.5 Hz, 1H), 2.62 (d, *J* = 15.8 Hz, 1H), 1.99 – 1.87 (m, 3H), 1.34 – 1.28 (m, 1H), 1.22 (t, *J* = 7.1 Hz, 6H); **<sup>13</sup>C NMR** (125 MHz, CDCl<sub>3</sub>) δ 197.4, 156.5, 143.9, 143.2, 129.1, 127.3, 119.9, 118.5, 114.9, 110.1, 96.6, 64.4, 47.2, 45.7, 44.9, 39.7, 27.8, 23.5. **HRMS (ESI) m/z:** [M+H]<sup>+</sup> calcd for C<sub>21</sub>H<sub>27</sub>N<sub>2</sub>O 323.2118, found: 323.2108.

**4-(diethylamino)-8'-methyl-1',2',3',3a'-tetrahydro-5'H-spiro[cyclohexane-1,4'-pyrrolo[1,2-a]quinoline]-2,4-dien-6-one (2b)**

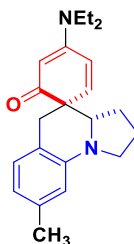

Flash column chromatography on a silica gel (ethyl acetate: petroleum ether, 1:8) gave the product (26.9 mg, 80% yield, dr > 20:1) as a reddish brown solid.

**<sup>1</sup>H NMR** (500 MHz, CDCl<sub>3</sub>) δ 6.92 (d, *J* = 7.5 Hz, 1H), 6.44 – 6.35 (m, 2H), 6.32 (s, 1H), 6.17 (d, *J* = 10.5 Hz, 1H), 5.33 (d, *J* = 2.2 Hz, 1H), 3.84 (dd, *J* = 9.8, 5.3 Hz, 1H), 3.49 – 3.40 (m, 2H), 3.37 (q, *J* = 7.1 Hz, 4H), 3.18 (d, *J* = 7.5 Hz, 1H), 2.59 (d, *J* = 15.7 Hz, 1H), 2.31 (s, 3H), 1.99 – 1.88 (m, 3H), 1.34 – 1.25 (m, 1H), 1.21 (t, *J* = 7.1 Hz, 6H); **<sup>13</sup>C NMR** (125 MHz, CDCl<sub>3</sub>) δ 197.5, 156.5, 144.1, 143.1, 136.9, 129.0, 118.4, 117.0, 115.9, 110.9, 96.6, 64.4, 47.2, 46.0, 44.9, 39.5, 27.8, 23.5, 21.6. **HRMS (ESI) m/z:** [M+H]<sup>+</sup> calcd for C<sub>22</sub>H<sub>29</sub>N<sub>2</sub>O 337.2274, found: 337.2269.

**7'-chloro-4-(diethylamino)-1',2',3',3a'-tetrahydro-5'H-spiro[cyclohexane-1,4'-pyrrolo[1,2-a]quinoline]-2,4-dien-6-one (2c)**

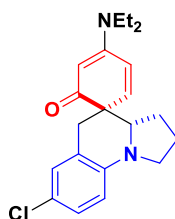

Flash column chromatography on a silica gel (ethyl acetate: petroleum ether, 1:8) gave the product (32.0 mg, 90% yield, dr > 20:1) as a reddish brown solid.

**<sup>1</sup>H NMR** (500 MHz, CDCl<sub>3</sub>) δ 7.02 (t, *J* = 8.0 Hz, 1H), 6.65 (d, *J* = 7.9 Hz, 1H), 6.42 (dd, *J* = 16.1, 5.3 Hz, 2H), 6.12 (d, *J* = 10.4 Hz, 1H), 5.36 (s, 1H), 3.80 (dd, *J* = 9.8, 5.1 Hz, 1H), 3.45 (t, *J* = 8.2 Hz, 1H), 3.38 (q, *J* = 7.1 Hz, 4H), 3.25 (d, *J* = 16.8 Hz, 1H), 3.20 (d, *J* = 7.8 Hz, 1H), 2.97 (d, *J* = 16.7 Hz, 1H), 2.01 – 1.88 (m, 3H), 1.38–1.28 (m, 1H), 1.23 (t, *J* = 7.1 Hz, 6H); **<sup>13</sup>C NMR** (125 MHz, CDCl<sub>3</sub>) δ 196.8, 156.6, 144.4, 143.5, 134.7, 127.5, 118.8, 117.8, 115.9, 108.7, 96.6, 63.8, 47.5, 45.6, 44.9, 37.0, 27.8, 23.6, 18.5. **HRMS (ESI) m/z**: [M+H]<sup>+</sup> calcd for C<sub>21</sub>H<sub>26</sub>ClN<sub>2</sub>O 357.1728, found: 357.1720.

**4-(diethylamino)-7'-methoxy-1',2',3',3a'-tetrahydro-5'H-spiro[cyclohexane-1,4'-pyrrolo[1,2-a]quinoline]-2,4-dien-6-one (2d)**

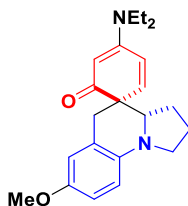

Flash column chromatography on a silica gel (ethyl acetate: petroleum ether, 1:8) gave the product (18.3 mg, 52% yield, dr > 20:1) as a reddish brown solid.

**<sup>1</sup>H NMR** (500 MHz, CDCl<sub>3</sub>) δ 6.66 (dd, *J* = 8.7, 2.8 Hz, 1H), 6.59 (d, *J* = 2.7 Hz, 1H), 6.37 (d, *J* = 8.7 Hz, 1H), 6.33 (dd, *J* = 10.5, 2.3 Hz, 1H), 6.10 (d, *J* = 10.5 Hz, 1H), 5.26 (d, *J* = 2.3 Hz, 1H), 3.72 (dd, *J* = 9.6, 5.4 Hz, 1H), 3.68 – 3.60 (m, 3H), 3.42 (d, *J* = 15.9 Hz, 1H), 3.37 – 3.19 (m, 5H), 3.08 (dd, *J* = 16.0, 8.3 Hz, 1H), 2.56 – 2.46 (m, 1H), 1.90 – 1.82 (m, 2H), 1.29 – 1.17 (m, 1H), 1.14 (t, *J* = 7.1 Hz, 6H), 1.05 (dd, *J* = 13.4, 6.6 Hz, 1H); **<sup>13</sup>C NMR** (125 MHz, CDCl<sub>3</sub>) δ 197.4, 156.6, 150.3, 144.1, 138.1, 121.1, 118.5, 115.4, 112.9, 111.0, 96.6, 64.7, 55.9, 47.7, 46.2, 44.9, 39.7, 27.7, 23.5. **HRMS (ESI) m/z**: [M+H]<sup>+</sup> calcd for C<sub>22</sub>H<sub>29</sub>N<sub>2</sub>O<sub>2</sub> 353.2224, found: 353.2229.

**4-(diethylamino)-6'-fluoro-1',2',3',3a'-tetrahydro-5'H-spiro[cyclohexane-1,4'-pyrrolo[1,2-a]quinoline]-2,4-dien-6-one (2e)**

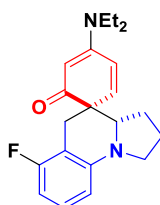

Flash column chromatography on a silica gel (ethyl acetate: petroleum ether, 1:8) gave the product (25.8 mg, 76% yield, dr 2:1) as a reddish brown solid.

**<sup>1</sup>H NMR** (500 MHz, CDCl<sub>3</sub>) δ 7.04 (dd, *J* = 15.0, 7.8 Hz, 1H), 6.44 (ddd, *J* = 36.8, 10.5, 2.0 Hz, 1H), 6.37 – 6.27 (m, 2H), 6.19 (dd, *J* = 47.4, 10.4 Hz, 1H), 5.79 (tdd, *J* = 10.6, 8.7, 5.1 Hz, 1H), 5.35 (dd, *J* = 10.8, 2.0 Hz, 1H), 5.10 (dd, *J* = 15.1, 9.2 Hz, 2H), 3.96 – 3.74 (m, 2H), 3.48 – 3.32 (m, 4H), 3.18 (dd, *J* = 31.4, 16.6 Hz, 1H), 2.83 (dd, *J* = 16.0, 11.6 Hz, 1H), 2.54 (dt, *J* = 18.7, 9.3 Hz, 1H), 2.26 – 1.96 (m, 1H), 1.96 – 1.72 (m, 3H), 1.43 – 1.32 (m, 1H), 1.23 (q, *J* = 7.0 Hz, 6H); **<sup>13</sup>C NMR** (125 MHz, CDCl<sub>3</sub>) δ 197.10 (s), 196.78 (s), 162.1 (d, *J* = 240.0 Hz), 161.7 (d, *J* = 240.0 Hz), 156.6, 143.5, 143.3, 143.2, 135.3, 134.9, 127.4, 127.3, 118.7, 118.6, 117.5, 117.2, 107.9 (d, *J* = 20.0 Hz), 106.9 (d, *J* = 20.0 Hz), 106.46 (d, *J* = 2.2 Hz), 106.1 (d, *J* = 2.2 Hz), 101.9, 101.7, 96.7, 96.6, 65.1, 62.6, 59.1, 57.0, 45.1, 45.0, 44.9, 37.0, 36.1, 32.1, 31.8, 28.5, 27.7, 26.0, 25.2. **HRMS (ESI) m/z**: [M+H]<sup>+</sup> calcd for C<sub>21</sub>H<sub>26</sub>FN<sub>2</sub>O 341.2024, found: 341.2016.

**6'-chloro-4-(diethylamino)-1',2',3',3a'-tetrahydro-5'H-spiro[cyclohexane-1,4'-pyrrolo[1,2-a]quinoline]-2,4-dien-6-one (2f)**

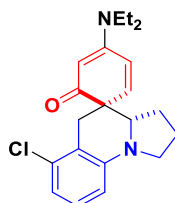

Flash column chromatography on a silica gel (ethyl acetate: petroleum ether, 1:8) gave the product (29.5 mg, 83% yield, dr > 20:1) as a reddish brown solid.

**<sup>1</sup>H NMR** (500 MHz, CDCl<sub>3</sub>) δ 7.05 (d, *J* = 8.6 Hz, 1H), 6.99 (s, 1H), 6.41 (t, *J* = 10.7 Hz, 2H), 6.08 (d, *J* = 10.4 Hz, 1H), 5.33 (s, 1H), 3.83 (dd, *J* = 9.4, 4.4 Hz, 1H), 3.41 (dq, *J* = 27.4, 6.9 Hz, 6H), 3.14 (d, *J* = 7.7 Hz, 1H), 2.56 (d, *J* = 16.0 Hz, 1H), 1.94 (dt, *J* = 22.1, 11.2 Hz, 3H), 1.28 (dd, *J* = 16.6, 8.8 Hz, 1H), 1.22 (t, *J* = 7.1 Hz, 6H); **<sup>13</sup>C NMR** (125 MHz, CDCl<sub>3</sub>) δ 196.9, 156.5, 143.3, 141.8, 128.7, 127.0, 121.4, 119.5, 118.9, 111.1, 96.6, 64.4, 47.4, 45.3, 39.4, 27.8, 23.5. **HRMS (ESI) m/z:** [M+H]<sup>+</sup> calcd for C<sub>21</sub>H<sub>26</sub>ClN<sub>2</sub>O 357.1728, found: 357.1721.

**6'-bromo-4-(diethylamino)-1',2',3',3a'-tetrahydro-5'H-spiro[cyclohexane-1,4'-pyrrolo[1,2-a]quinoline]-2,4-dien-6-one (2g)**

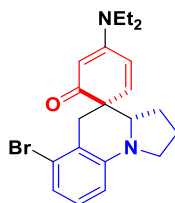

Flash column chromatography on a silica gel (ethyl acetate: petroleum ether, 1:8) gave the product (28.0 mg, 90% yield, dr > 20:1) as a reddish brown solid.

**<sup>1</sup>H NMR** (500 MHz, CDCl<sub>3</sub>) δ 6.95 (t, *J* = 8.0 Hz, 1H), 6.83 (d, *J* = 7.8 Hz, 1H), 6.47 – 6.39 (m, 2H), 6.12 (d, *J* = 10.4 Hz, 1H), 5.36 (d, *J* = 2.2 Hz, 1H), 3.80 (dd, *J* = 9.8, 5.3 Hz, 1H), 3.49 – 3.41 (m, 1H), 3.39 (q, *J* = 7.1 Hz, 4H), 3.27 (d, *J* = 16.7 Hz, 1H), 3.20 (dd, *J* = 16.2, 8.8 Hz, 1H), 2.94 (d, *J* = 16.7 Hz, 1H), 2.03 – 1.86 (m, 3H), 1.31 (dd, *J* = 14.5, 6.6 Hz, 1H), 1.27 – 1.19 (m, 6H); **<sup>13</sup>C NMR** (125 MHz, CDCl<sub>3</sub>) δ 196.7, 156.6, 144.5, 143.4, 128.0, 125.6, 119.4, 119.1, 118.8, 109.3, 96.6, 63.9, 58.4, 47.4, 45.9, 45.0, 39.9, 27.7, 23.6. **HRMS (ESI) m/z:** [M+H]<sup>+</sup> calcd for C<sub>21</sub>H<sub>26</sub>BrN<sub>2</sub>O 401.1223, found: 401.1228.

**4-(diethylamino)-6a',6b',7',8',9',10',10a',11'-octahydro-5'H-spiro[cyclohexane-1,6'-isoindolo[2,1-a]quinoline]-2,4-dien-6-one (2h)**

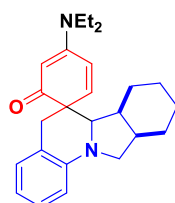

Flash column chromatography on a silica gel (ethyl acetate: petroleum ether, 1:8) gave the product (29.3 mg, 78% yield, dr 1:1) as a yellow oil.

**<sup>1</sup>H NMR** (500 MHz, CDCl<sub>3</sub>) δ 7.12 (t, *J* = 7.4 Hz, 2H), 6.99 (t, *J* = 6.9 Hz, 2H), 6.59 – 6.52 (m, 2H), 6.50 (d, *J* = 8.0 Hz, 1H), 6.46 (d, *J* = 8.0 Hz, 1H), 6.37 (t, *J* = 2.5 Hz, 1H), 6.35 (t, *J* = 2.5 Hz, 1H), 6.14

(d,  $J = 3.7$  Hz, 1H), 6.12 (d,  $J = 3.7$  Hz, 1H), 5.35 (dd,  $J = 6.4, 2.2$  Hz, 2H), 4.43 (dt,  $J = 12.8, 6.4$  Hz, 1H), 4.10 (d,  $J = 9.7$  Hz, 1H), 3.74 (d,  $J = 10.0$  Hz, 1H), 3.62 – 3.54 (m, 1H), 3.50 – 3.34 (m, 9H), 3.26 – 3.16 (m, 2H), 2.71 (dd,  $J = 10.4, 8.7$  Hz, 1H), 2.59 (dd,  $J = 15.7, 5.2$  Hz, 2H), 2.08 (dd,  $J = 11.9, 5.5$  Hz, 1H), 2.00 – 1.91 (m, 1H), 1.84 – 1.59 (m, 9H), 1.45 – 1.39 (m, 3H), 1.25 – 1.19 (m, 12H), 1.17 – 0.96 (m, 5H), 0.90 – 0.83 (m, 1H);  $^{13}\text{C}$  NMR (125 MHz,  $\text{CDCl}_3$ )  $\delta$  198.1, 197.9, 157.2, 156.9, 145.1, 145.0, 143.5, 143.0, 128.8, 127.5, 127.4, 119.3, 119.0, 118.0, 117.9, 114.7, 114.4, 109.9, 109.1, 96.3, 96.2, 69.4, 69.1, 68.8, 64.0, 53.8, 51.9, 48.3, 45.1, 44.9, 43.3, 41.1, 41.0, 40.9, 37.4, 29.6, 29.1, 28.6, 26.6, 25.8, 25.8, 25.2, 21.6. HRMS (ESI)  $m/z$ :  $[\text{M}+\text{H}]^+$  calcd for  $\text{C}_{25}\text{H}_{33}\text{N}_2\text{O}$  377.2587, found: 377.2576.

**4-(pyrrolidin-1-yl)-1',2',3',3a'-tetrahydro-5'H-spiro[cyclohexane-1,4'-pyrrolo[1,2-a]quinoline]-2,4-dien-6-one (2i)<sup>[3]</sup>**

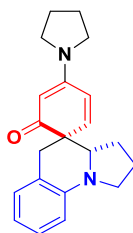

Flash column chromatography on a silica gel (ethyl acetate: petroleum ether, 1:10) gave the product (23.4 mg, 73% yield, dr > 20:1) as a reddish brown solid.

$^1\text{H}$  NMR (500 MHz,  $\text{CDCl}_3$ )  $\delta$  7.13 (t,  $J = 7.6$  Hz, 1H), 7.03 (d,  $J = 7.3$  Hz, 1H), 6.58 (dd,  $J = 10.7, 4.0$  Hz, 1H), 6.50 (d,  $J = 8.0$  Hz, 1H), 6.38 (dd,  $J = 10.3, 2.1$  Hz, 1H), 6.16 (d,  $J = 10.3$  Hz, 1H), 5.23 (d,  $J = 1.9$  Hz, 1H), 3.88 (dd,  $J = 9.9, 5.2$  Hz, 1H), 3.55 (s, 2H), 3.48 (dd,  $J = 9.2, 6.8$  Hz, 2H), 3.33 (s, 2H), 3.20 (t,  $J = 8.1$  Hz, 1H), 2.61 (d,  $J = 15.8$  Hz, 1H), 2.01 (s, 4H), 1.98 – 1.90 (m, 3H), 1.37 – 1.25 (m, 2H);  $^{13}\text{C}$  NMR (125 MHz,  $\text{CDCl}_3$ )  $\delta$  197.0, 155.9, 144.1, 143.2, 129.1, 127.3, 119.9, 115.0, 110.1, 97.0, 64.3, 48.2, 47.9, 47.2, 46.2, 40.0, 27.9, 25.4, 24.8, 23.5. HRMS (ESI)  $m/z$ :  $[\text{M}+\text{H}]^+$  calcd for  $\text{C}_{21}\text{H}_{25}\text{N}_2\text{O}$  321.1961, found: 321.1955.

**1',2',3',3a'-tetrahydro-5'H,6H-spiro[benzo[d][1,3]dioxole-5,4'-pyrrolo[1,2-a]quinolin]-6-one (2j)<sup>[3]</sup>**

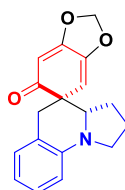

Flash column chromatography on a silica gel (ethyl acetate: petroleum ether, 1:20) gave the product (27.1 mg, 92% yield, dr > 20:1) as a yellow solid.

$^1\text{H}$  NMR (500 MHz,  $\text{CDCl}_3$ )  $\delta$  7.14 (t,  $J = 7.7$  Hz, 1H), 7.02 (d,  $J = 7.3$  Hz, 1H), 6.60 (t,  $J = 7.3$  Hz, 1H), 6.51 (d,  $J = 8.1$  Hz, 1H), 5.81 (d,  $J = 9.9$  Hz, 2H), 5.71 (s, 1H), 5.20 (s, 1H), 3.75 (dd,  $J = 9.8, 5.4$  Hz, 1H), 3.52 – 3.43 (m, 1H), 3.38 (d,  $J = 15.5$  Hz, 1H), 3.19 (dd,  $J = 16.3, 8.7$  Hz, 1H), 2.69 (d,  $J = 15.6$  Hz, 1H), 2.04 – 1.84 (m, 3H), 1.46 – 1.34 (m, 1H);  $^{13}\text{C}$  NMR (125 MHz,  $\text{CDCl}_3$ )  $\delta$  201.2, 163.8, 145.2, 142.9, 129.3, 127.6, 119.2, 115.4, 110.4, 104.6, 101.5, 99.3, 65.4, 48.4, 47.1, 41.1, 27.5, 23.5. HRMS (ESI)  $m/z$ :  $[\text{M}+\text{H}]^+$  calcd for  $\text{C}_{18}\text{H}_{18}\text{NO}_3$  296.1281, found: 296.1271.

**2-(2-(2-allylpyrrolidin-1-yl)benzyl)-5-(diethylamino)phenol (3a)**



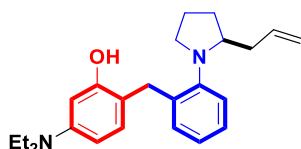

Flash column chromatography on a silica gel (ethyl acetate: petroleum ether, 1:20) gave the product (25.7 mg, 71% yield) as a white solid.

**<sup>1</sup>H NMR** (500 MHz, CDCl<sub>3</sub>) δ 10.32 (s, 1H), 7.36 (d, *J* = 7.6 Hz, 1H), 7.19 – 7.11 (m, 2H), 7.10 – 7.04 (m, 2H), 6.22 (d, *J* = 2.0 Hz, 1H), 6.17 (d, *J* = 8.3 Hz, 1H), 5.70 (ddd, *J* = 14.2, 10.0, 5.1 Hz, 1H), 5.08 – 4.95 (m, 2H), 3.92 (d, *J* = 14.1 Hz, 1H), 3.67 (d, *J* = 14.0 Hz, 1H), 3.63 – 3.56 (m, 1H), 3.42 – 3.36 (m, 1H), 3.32 – 3.22 (m, 4H), 2.82 (dd, *J* = 17.4, 8.6 Hz, 1H), 2.36 – 2.26 (m, 1H), 2.24 – 2.18 (m, 1H), 2.13 – 2.07 (m, 2H), 2.00 – 1.90 (m, 1H), 1.86 – 1.76 (m, 1H), 1.10 (t, *J* = 7.0 Hz, 6H); **<sup>13</sup>C NMR** (125 MHz, CDCl<sub>3</sub>) δ 155.8, 148.3, 145.0, 139.2, 135.5, 131.2, 130.3, 127.3, 125.9, 121.0, 116.7, 115.5, 104.1, 100.4, 63.0, 55.8, 44.4, 36.6, 33.2, 29.5, 22.0, 12.7. **HRMS (ESI) m/z**: [M+H]<sup>+</sup> calcd for C<sub>24</sub>H<sub>33</sub>N<sub>2</sub>O 365.2587, found: 365.2572.

### 2-(2-(2-allylpyrrolidin-1-yl)-4-methylbenzyl)-5-(diethylamino)phenol (3b)

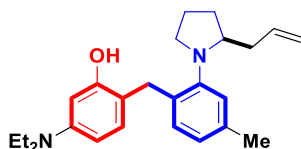

Flash column chromatography on a silica gel (ethyl acetate: petroleum ether, 1:20) gave the product (22.3 mg, 60% yield) as a yellow oil.

**<sup>1</sup>H NMR** (500 MHz, CDCl<sub>3</sub>) δ 10.31 (s, 1H), 7.24 (d, *J* = 7.7 Hz, 1H), 7.04 (d, *J* = 8.4 Hz, 1H), 6.94 (s, 1H), 6.89 (d, *J* = 7.7 Hz, 1H), 6.21 (d, *J* = 2.3 Hz, 1H), 6.16 (dd, *J* = 8.3, 2.4 Hz, 1H), 5.76–5.68 (m, 1H), 5.06 – 4.96 (m, 2H), 3.87 (d, *J* = 14.1 Hz, 1H), 3.64 (d, *J* = 14.1 Hz, 1H), 3.57 (ddd, *J* = 9.8, 8.3, 4.4 Hz, 1H), 3.43 – 3.33 (m, 1H), 3.26 (q, *J* = 7.0 Hz, 4H), 2.88 – 2.78 (m, 1H), 2.34 – 2.29 (m, 1H), 2.27 (s, 3H), 2.24–2.18 (m, 1H), 2.16 – 2.06 (m, 2H), 2.02 – 1.90 (m, 1H), 1.86 – 1.74 (m, 1H), 1.10 (t, *J* = 7.0 Hz, 6H); **<sup>13</sup>C NMR** (125 MHz, CDCl<sub>3</sub>) δ 155.8, 148.2, 144.8, 136.9, 136.2, 135.6, 130.9, 130.3, 126.6, 121.7, 116.7, 115.8, 104.2, 100.5, 63.0, 55.6, 44.4, 36.6, 32.9, 29.5, 22.0, 21.2, 12.7. **HRMS (ESI) m/z**: [M+H]<sup>+</sup> calcd for C<sub>25</sub>H<sub>35</sub>N<sub>2</sub>O 379.2744, found: 379.2736.

### 2-(2-(2-allylpyrrolidin-1-yl)-5-methoxybenzyl)-5-(diethylamino)phenol (3c)

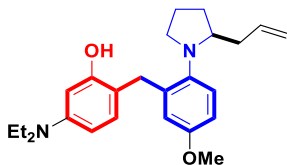

Flash column chromatography on a silica gel (ethyl acetate: petroleum ether, 1:20) gave the product (16.9 mg, 43% yield) as a white solid.

**<sup>1</sup>H NMR** (500 MHz, CDCl<sub>3</sub>) δ 10.46 (s, 1H), 6.99 (dd, *J* = 11.3, 8.6 Hz, 2H), 6.82 (d, *J* = 3.0 Hz, 1H), 6.64 (dd, *J* = 8.8, 3.0 Hz, 1H), 6.15 (d, *J* = 2.2 Hz, 1H), 6.09 (dd, *J* = 8.3, 2.2 Hz, 1H), 5.66–5.58 (m, 1H), 5.00 – 4.85 (m, 2H), 3.77 (d, *J* = 13.9 Hz, 1H), 3.70 (s, 3H), 3.59 (d, *J* = 14.0 Hz, 1H), 3.43 (ddd, *J* = 9.7, 8.4, 4.0 Hz, 1H), 3.20 (q, *J* = 7.2 Hz, 5H), 2.71 (dd, *J* = 17.9, 8.5 Hz, 1H), 2.25 – 2.17 (m, 1H), 2.16 – 2.09 (m, 1H), 2.09 – 1.96 (m, 2H), 1.92 – 1.82 (m, 1H), 1.76 – 1.68 (m, 1H), 1.03 (t, *J* = 7.0 Hz, 6H); **<sup>13</sup>C NMR** (125 MHz, CDCl<sub>3</sub>) δ 156.1, 154.8, 147.3, 139.8, 136.9, 134.5, 129.2, 121.2, 115.6, 115.1,

114.2, 111.3, 103.1, 99.4, 62.7, 54.9, 54.3, 43.3, 35.5, 32.4, 28.3, 20.8, 11.6. **HRMS (ESI) m/z:** [M+H]<sup>+</sup> calcd for C<sub>25</sub>H<sub>35</sub>N<sub>2</sub>O<sub>2</sub> 395.2693, found: 395.2700.

**2-(2-(2-allylpyrrolidin-1-yl)-5-chlorobenzyl)-5-(diethylamino)phenol (3d)**

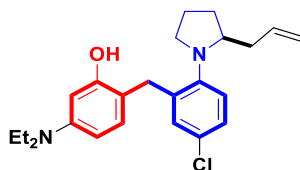

Flash column chromatography on a silica gel (ethyl acetate: petroleum ether, 1:20) gave the product (33.8 mg, 85% yield) as a yellow oil.

**<sup>1</sup>H NMR** (500 MHz, CDCl<sub>3</sub>) δ 10.00 (s, 1H), 7.32 (d, *J* = 2.5 Hz, 1H), 7.13 (dd, *J* = 8.6, 2.5 Hz, 1H), 7.05 (dd, *J* = 10.1, 8.6 Hz, 2H), 6.24 – 6.15 (m, 2H), 5.73–5.65 (m, 1H), 5.04–4.98 (m, 2H), 3.88 (d, *J* = 14.1 Hz, 1H), 3.62 (d, *J* = 14.1 Hz, 1H), 3.57 (ddd, *J* = 9.7, 8.3, 4.6 Hz, 1H), 3.34 (dt, *J* = 14.5, 5.2 Hz, 1H), 3.27 (q, *J* = 7.2 Hz, 4H), 2.79 (dd, *J* = 17.2, 8.6 Hz, 1H), 2.32 – 2.18 (m, 2H), 2.15 – 2.06 (m, 2H), 2.01 – 1.89 (m, 1H), 1.87 – 1.74 (m, 1H), 1.11 (t, *J* = 7.0 Hz, 6H); **<sup>13</sup>C NMR** (125 MHz, CDCl<sub>3</sub>) δ 155.7, 148.5, 143.7, 141.0, 135.2, 130.9, 130.8, 130.4, 127.2, 122.5, 116.9, 114.4, 104.2, 100.2, 63.2, 55.7, 44.4, 36.5, 32.9, 29.5, 22.0, 12.7. **HRMS (ESI) m/z:** [M+H]<sup>+</sup> calcd for C<sub>24</sub>H<sub>32</sub>ClN<sub>2</sub>O 399.2198, found: 399.2190.

**2-(2-(2-allylpyrrolidin-1-yl)-6-fluorobenzyl)-5-(diethylamino)phenol (3e)**

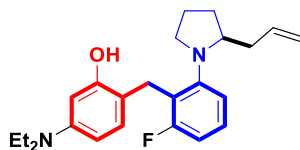

Flash column chromatography on a silica gel (ethyl acetate: petroleum ether, 1:20) gave the product (24.0 mg, 63% yield) as a yellow oil.

**<sup>1</sup>H NMR** (500 MHz, CDCl<sub>3</sub>) δ 9.98 (s, 1H), 7.15 – 7.07 (m, 1H), 7.05 – 6.97 (m, 1H), 6.84 (d, *J* = 8.1 Hz, 1H), 6.75 (t, *J* = 8.8 Hz, 1H), 6.12 (s, 1H), 6.09 (dd, *J* = 8.3, 2.4 Hz, 1H), 5.67 – 5.55 (m, 1H), 4.96–4.90 (m, 2H), 3.81 (d, *J* = 14.3 Hz, 1H), 3.69 (d, *J* = 14.3 Hz, 1H), 3.56 – 3.49 (m, 1H), 3.35 – 3.26 (m, 1H), 3.22 – 3.12 (m, 4H), 2.73 (dd, *J* = 17.1, 8.5 Hz, 1H), 2.25 – 2.17 (m, 1H), 2.15–2.09 (m, 1H), 2.09 – 1.97 (m, 2H), 1.90–1.81 (m, 1H), 1.75–1.68 (m, 1H), 1.02 (t, *J* = 7.0 Hz, 6H); **<sup>13</sup>C NMR** (125 MHz, CDCl<sub>3</sub>) δ 162.2 (d, *J* = 245.7 Hz), 156.1, 148.3, 147.1 (d, *J* = 6.2 Hz), 135.3, 131.4 (d, *J* = 3.0 Hz), 127.5 (d, *J* = 10.2 Hz), 126.5 (d, *J* = 15.9 Hz), 116.9, 116.6 (d, *J* = 2.5 Hz), 113.6, 112.8, 112.6, 104.0, 99.9, 63.0, 55.7, 44.4, 36.5, 29.5, 24.7 (d, *J* = 3.4 Hz), 22.0, 12.8. **HRMS (ESI) m/z:** [M+H]<sup>+</sup> calcd for C<sub>24</sub>H<sub>32</sub>FN<sub>2</sub>O 383.2493, found: 383.2484.

**2-(2-(2-allylpyrrolidin-1-yl)-6-chlorobenzyl)-5-(diethylamino)phenol (3f)**

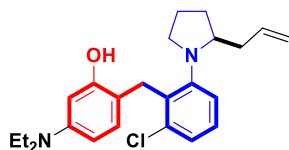

Flash column chromatography on a silica gel (ethyl acetate: petroleum ether, 1:20) gave the product (27.8 mg, 70% yield) as a yellow oil.

**<sup>1</sup>H NMR** (500 MHz, CDCl<sub>3</sub>) δ 10.37 (s, 1H), 7.46 (d, *J* = 8.5 Hz, 1H), 7.20 (dd, *J* = 6.8, 2.1 Hz, 1H), 7.12 – 7.06 (m, 2H), 6.21 (d, *J* = 2.3 Hz, 1H), 6.17 (dd, *J* = 8.5, 2.4 Hz, 1H), 5.73–5.64 (m, 1H), 5.04–4.98 (m, 2H), 4.02 (dd, *J* = 56.0, 14.4 Hz, 2H), 3.59 (td, *J* = 9.2, 4.9 Hz, 1H), 3.45 – 3.35 (m, 1H), 3.27 (q, *J* = 7.1 Hz, 4H), 2.81 (dd, *J* = 17.0, 8.7 Hz, 1H), 2.33 – 2.18 (m, 2H), 2.17 – 2.06 (m, 2H), 2.02 – 1.91 (m, 1H), 1.90 – 1.78 (m, 1H), 1.11 (t, *J* = 7.0 Hz, 6H); **<sup>13</sup>C NMR** (125 MHz, CDCl<sub>3</sub>) δ 156.4, 148.3, 147.3, 136.6, 135.9, 135.2, 132.0, 127.5, 127.3, 119.9, 116.9, 113.1, 103.7, 99.9, 63.4, 55.6, 44.3, 36.3, 29.3, 28.7, 21.9, 12.8. **HRMS (ESI) m/z:** [M+H]<sup>+</sup> calcd for C<sub>24</sub>H<sub>32</sub>ClN<sub>2</sub>O 399.2198, found: 399.2191.

**2-(2-(2-allylpyrrolidin-1-yl)-6-bromobenzyl)-5-(diethylamino)phenol (3g)**

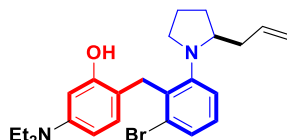

Flash column chromatography on a silica gel (ethyl acetate: petroleum ether, 1:20) gave the product (27.4 mg, 62% yield) as a yellow solid.

**<sup>1</sup>H NMR** (500 MHz, CDCl<sub>3</sub>) δ 10.42 (s, 1H), 7.59 (d, *J* = 8.5 Hz, 1H), 7.40 (d, *J* = 7.9 Hz, 1H), 7.12 (d, *J* = 8.0 Hz, 1H), 7.02 (t, *J* = 8.0 Hz, 1H), 6.21 (d, *J* = 2.2 Hz, 1H), 6.17 (dd, *J* = 8.5, 2.3 Hz, 1H), 5.74 – 5.62 (m, 1H), 5.01 (t, *J* = 13.9 Hz, 2H), 4.07 (dd, *J* = 36.4, 14.5 Hz, 2H), 3.56 (td, *J* = 9.1, 4.8 Hz, 1H), 3.46 – 3.34 (m, 1H), 3.27 (q, *J* = 7.0 Hz, 4H), 2.80 (dd, *J* = 17.0, 8.7 Hz, 1H), 2.26–2.17 (m, 2H), 2.16 – 2.06 (m, 2H), 2.01 – 1.92 (m, 1H), 1.88 – 1.78 (m, 1H), 1.11 (t, *J* = 7.0 Hz, 6H); **<sup>13</sup>C NMR** (125 MHz, CDCl<sub>3</sub>) δ 156.3, 148.3, 147.5, 138.3, 135.2, 132.1, 130.9, 127.9, 126.7, 120.7, 116.9, 113.2, 103.6, 99.9, 63.6, 55.7, 44.3, 36.3, 31.1, 29.3, 21.9, 12.7. **HRMS (ESI) m/z:** [M+H]<sup>+</sup> calcd for C<sub>24</sub>H<sub>32</sub>BrN<sub>2</sub>O 443.1693, found: 443.1684.

**2-(2-(1-allyloctahydro-2H-isoindol-2-yl)benzyl)-5-(diethylamino)phenol (3h)**

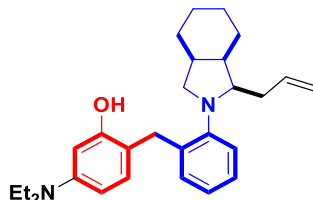

Flash column chromatography on a silica gel (ethyl acetate: petroleum ether, 1:20) gave the product (25.0 mg, 60% yield) as a yellow oil.

**<sup>1</sup>H NMR** (500 MHz, CDCl<sub>3</sub>) δ 10.04 (s, 1H), 7.31 (dd, *J* = 7.6, 1.4 Hz, 1H), 7.22 (d, *J* = 7.2 Hz, 1H), 7.20 – 7.15 (m, 1H), 7.08–7.05 (m, 1H), 7.03 (d, *J* = 8.4 Hz, 1H), 6.26 (d, *J* = 2.5 Hz, 1H), 6.18 (dd, *J* = 8.4, 2.5 Hz, 1H), 5.66 (ddd, *J* = 17.1, 6.7, 3.6 Hz, 1H), 5.03 (dd, *J* = 17.2, 1.7 Hz, 1H), 4.92 (dd, *J* = 10.3, 1.6 Hz, 1H), 4.04 (d, *J* = 14.2 Hz, 1H), 3.70–3.65 (m, 2H), 3.36 (dd, *J* = 9.6, 5.9 Hz, 1H), 3.27 (q, *J* = 7.1 Hz, 4H), 2.61 (t, *J* = 9.9 Hz, 1H), 2.39 (t, *J* = 6.7 Hz, 2H), 2.01–1.95 (m, 2H), 1.92–1.77 (m, 4H), 1.39 – 1.21 (m, 4H), 1.11 (t, *J* = 7.0 Hz, 6H); **<sup>13</sup>C NMR** (125 MHz, CDCl<sub>3</sub>) δ 155.6, 149.9, 148.2, 139.6, 136.6, 130.9, 130.4, 127.6, 125.8, 125.0, 116.5, 115.5, 104.4, 100.5, 69.8, 62.2, 49.1, 44.4, 42.7, 36.5, 33.5, 29.6, 27.6, 26.4, 25.6, 12.7. **HRMS (ESI) m/z:** [M+H]<sup>+</sup> calcd for C<sub>28</sub>H<sub>39</sub>N<sub>2</sub>O 419.3057, found: 419.3048.

**2-(2-(2-allylpyrrolidin-1-yl)benzyl)-5-(pyrrolidin-1-yl)phenol (3i)**

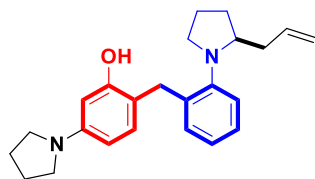

Flash column chromatography on a silica gel (ethyl acetate: petroleum ether, 1:20) gave the product (18.1 mg, 50% yield) as a yellow solid.

**<sup>1</sup>H NMR** (500 MHz, CDCl<sub>3</sub>) δ 10.34 (s, 1H), 7.36 (dd, *J* = 7.5, 1.4 Hz, 1H), 7.19 – 7.12 (m, 2H), 7.08–7.05 (m, 2H), 6.12 (d, *J* = 2.0 Hz, 1H), 6.07 (dd, *J* = 8.2, 2.2 Hz, 1H), 5.71 (ddt, *J* = 17.1, 10.2, 7.1 Hz, 1H), 5.06 – 4.95 (m, 2H), 3.94 (d, *J* = 14.0 Hz, 1H), 3.68 (d, *J* = 14.1 Hz, 1H), 3.60 (ddd, *J* = 9.8, 8.3, 4.3 Hz, 1H), 3.43 – 3.35 (m, 1H), 3.20 (t, *J* = 6.5 Hz, 4H), 2.82 (dd, *J* = 17.5, 8.6 Hz, 1H), 2.34 – 2.26 (m, 1H), 2.25–2.18 (m, 1H), 2.16–2.06 (m, 2H), 2.03 – 1.86 (m, 5H), 1.85–1.77 (m, 1H); **<sup>13</sup>C NMR** (125 MHz, CDCl<sub>3</sub>) δ 155.6, 148.5, 144.9, 139.3, 135.5, 131.1, 130.2, 127.2, 125.8, 120.9, 116.7, 115.6, 104.0, 100.3, 62.9, 55.8, 47.7, 36.5, 33.2, 29.5, 25.5, 21.9. **HRMS (ESI) m/z**: [M+H]<sup>+</sup> calcd for C<sub>24</sub>H<sub>31</sub>N<sub>2</sub>O 363.2431, found: 363.2423.

### 6-(4-methyl-2-(2-vinylpyrrolidin-1-yl)benzyl)benzo[d][1,3]dioxol-5-ol (3j)

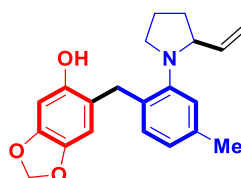

Flash column chromatography on a silica gel (ethyl acetate: petroleum ether, 1:10) gave the product (21.9 mg, 65% yield) as a yellow solid.

**<sup>1</sup>H NMR** (500 MHz, CDCl<sub>3</sub>) δ 10.41 (s, 1H), 7.20 (d, *J* = 7.6 Hz, 1H), 6.94 (s, 1H), 6.90 (d, *J* = 7.6 Hz, 1H), 6.69 (s, 1H), 6.42 (s, 1H), 5.80 (d, *J* = 15.4 Hz, 2H), 5.78 – 5.70 (m, 1H), 5.08 (d, *J* = 17.1 Hz, 1H), 5.01 (d, *J* = 10.1 Hz, 1H), 3.92 – 3.82 (m, 2H), 3.63 (d, *J* = 14.0 Hz, 1H), 3.58 (d, *J* = 8.0 Hz, 1H), 2.91 – 2.81 (m, 1H), 2.27 (s, 3H), 2.23 – 2.09 (m, 2H), 2.05 – 1.92 (m, 2H); **<sup>13</sup>C NMR** (125 MHz, CDCl<sub>3</sub>) δ 149.5, 146.8, 144.8, 140.7, 137.2, 137.1, 135.4, 130.5, 126.7, 122.5, 120.0, 118.2, 108.7, 100.7, 99.4, 67.0, 55.9, 33.4, 30.9, 22.3, 21.2. **HRMS (ESI) m/z**: [M+H]<sup>+</sup> calcd for C<sub>21</sub>H<sub>24</sub>NO<sub>3</sub> 338.1751, found: 338.1754.

### 6-(5-chloro-2-(2-vinylpyrrolidin-1-yl)benzyl)benzo[d][1,3]dioxol-5-ol (3k)

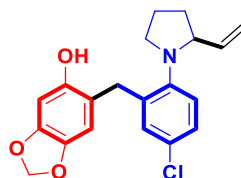

Flash column chromatography on a silica gel (ethyl acetate: petroleum ether, 1:10) gave the product (22.8 mg, 64% yield) as a yellow solid.

**<sup>1</sup>H NMR** (500 MHz, CDCl<sub>3</sub>) δ 10.08 (s, 1H), 7.28 (s, 1H), 7.14 (d, *J* = 8.5 Hz, 1H), 7.07 (d, *J* = 8.5 Hz, 1H), 6.68 (s, 1H), 6.43 (s, 1H), 5.84 (d, *J* = 13.3 Hz, 2H), 5.77 – 5.63 (m, 1H), 5.04 (dd, *J* = 24.9, 13.6 Hz, 2H), 3.88 (d, *J* = 14.0 Hz, 1H), 3.81 (dd, *J* = 15.3, 7.6 Hz, 1H), 3.62 (d, *J* = 14.0 Hz, 1H), 3.57 (d, *J* = 8.3 Hz, 1H), 2.83 (dd, *J* = 16.6, 8.3 Hz, 1H), 2.21 (dd, *J* = 10.8, 6.1 Hz, 1H), 2.17 – 2.07 (m, 1H), 2.07

– 1.90 (m, 2H);  $^{13}\text{C}$  NMR (125 MHz,  $\text{CDCl}_3$ )  $\delta$  149.5, 147.1, 143.7, 140.9, 140.2, 136.8, 130.9, 130.5, 127.4, 123.3, 118.7, 118.6, 108.7, 100.9, 99.4, 67.4, 55.9, 33.5, 30.9, 22.3. **HRMS (ESI) m/z:**  $[\text{M}+\text{H}]^+$  calcd for  $\text{C}_{20}\text{H}_{21}\text{ClNO}_3$  358.1204, found: 358.1193.

**6-(2-(2-ethynylpyrrolidin-1-yl)benzyl)benzo[d][1,3]dioxol-5-ol (3l)<sup>[3]</sup>**

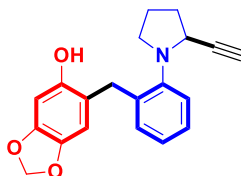

Flash column chromatography on a silica gel (ethyl acetate: petroleum ether, 1:10) gave the product (19.9 mg, 62% yield) as a yellow solid.

$^1\text{H}$  NMR (500 MHz,  $\text{CDCl}_3$ )  $\delta$  9.87 (s, 1H), 7.34 (d,  $J = 7.4$  Hz, 1H), 7.25 (d,  $J = 6.8$  Hz, 1H), 7.20 (t,  $J = 7.5$  Hz, 1H), 7.13 (t,  $J = 7.2$  Hz, 1H), 6.72 (s, 1H), 6.41 (s, 1H), 5.81 (d,  $J = 14.0$  Hz, 2H), 4.21 (s, 1H), 3.87 (d,  $J = 14.1$  Hz, 1H), 3.79 (d,  $J = 14.1$  Hz, 1H), 3.58 – 3.47 (m, 1H), 3.03 (t,  $J = 9.9$  Hz, 1H), 2.49 – 2.41 (m, 1H), 2.23 (s, 1H), 2.22 – 2.13 (m, 2H), 2.12 – 2.04 (m, 1H);  $^{13}\text{C}$  NMR (125 MHz,  $\text{CDCl}_3$ )  $\delta$  149.8, 146.9, 143.7, 140.6, 137.9, 130.7, 127.3, 126.5, 122.2, 119.1, 108.7, 100.8, 99.0, 81.8, 73.7, 55.8, 51.7, 33.5, 31.8, 22.2. **HRMS (ESI) m/z:**  $[\text{M}+\text{H}]^+$  calcd for  $\text{C}_{20}\text{H}_{20}\text{NO}_3$  322.1438, found: 322.1426.

**2-(5-chloro-2-(2-methylpyrrolidin-1-yl)benzyl)-5-(diethylamino)phenol (3m)**

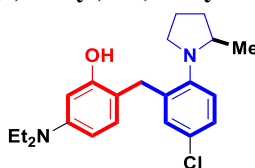

Flash column chromatography on a silica gel (ethyl acetate: petroleum ether, 1:10) gave the product (26.7 mg, 72% yield) as a yellow solid.

$^1\text{H}$  NMR (500 MHz,  $\text{CDCl}_3$ )  $\delta$  10.22 (s, 1H), 7.32 (d,  $J = 2.4$  Hz, 1H), 7.11 (dd,  $J = 8.6, 2.4$  Hz, 1H), 7.03 (t,  $J = 8.2$  Hz, 2H), 6.21 (d,  $J = 2.0$  Hz, 1H), 6.17 (d,  $J = 8.3$  Hz, 1H), 3.91 (d,  $J = 14.1$  Hz, 1H), 3.64 – 3.54 (m, 2H), 3.42 (dt,  $J = 8.4, 6.4$  Hz, 1H), 3.26 (q,  $J = 7.4$  Hz, 4H), 2.76 (dd,  $J = 17.1, 9.0$  Hz, 1H), 2.24 – 2.14 (m, 1H), 2.13 – 2.03 (m, 1H), 2.00 – 1.87 (m, 1H), 1.84 – 1.70 (m, 1H), 1.10 (t,  $J = 7.1$  Hz, 6H), 1.08 (d,  $J = 6.3$  Hz, 3H);  $^{13}\text{C}$  NMR (125 MHz,  $\text{CDCl}_3$ )  $\delta$  155.9, 148.5, 143.7, 140.9, 130.9, 130.6, 130.4, 127.2, 122.4, 114.5, 104.1, 100.3, 58.8, 55.7, 44.4, 33.0, 31.8, 21.9, 17.0, 12.7. **HRMS (ESI) m/z:**  $[\text{M}+\text{H}]^+$  calcd for  $\text{C}_{22}\text{H}_{30}\text{ClN}_2\text{O}$  373.2041, found: 373.2033.

**5-(diethylamino)-2-(2-(2-ethylpyrrolidin-1-yl)-5-methoxybenzyl)phenol (3n)**

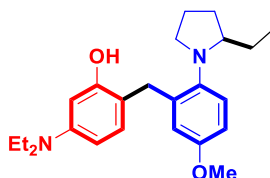

Flash column chromatography on a silica gel (ethyl acetate: petroleum ether, 1:20) gave the product (16.4 mg, 43% yield) as a yellow solid.

$^1\text{H}$  NMR (500 MHz,  $\text{CDCl}_3$ )  $\delta$  10.65 (s, 1H), 7.05 (d,  $J = 8.2$  Hz, 2H), 6.89 (s, 1H), 6.70 (d,  $J = 8.6$  Hz, 1H), 6.22 (s, 1H), 6.16 (d,  $J = 8.1$  Hz, 1H), 3.83 (d,  $J = 13.9$  Hz, 1H), 3.76 (s, 3H), 3.68 (d,  $J = 13.9$  Hz,

1H), 3.48 (s, 1H), 3.35 – 3.20 (m, 4H), 3.10 (d,  $J = 7.4$  Hz, 1H), 2.82 – 2.71 (m, 1H), 2.21 (d,  $J = 5.6$  Hz, 1H), 2.07 (d,  $J = 8.1$  Hz, 1H), 1.93 (s, 1H), 1.78 – 1.67 (m, 1H), 1.54 (s, 1H), 1.38 (dd,  $J = 9.7, 7.0$  Hz, 1H), 1.10 (t,  $J = 6.5$  Hz, 6H), 0.85 (t,  $J = 7.1$  Hz, 3H);  $^{13}\text{C}$  NMR (125 MHz,  $\text{CDCl}_3$ )  $\delta$  157.1, 155.9, 148.3, 140.94, 138.3, 130.3, 122.2, 116.0, 115.4, 112.3, 104.1, 100.5, 66.2, 56.3, 55.4, 44.4, 33.5, 29.3, 24.9, 21.8, 12.7, 11.5. **HRMS (ESI) m/z:**  $[\text{M}+\text{H}]^+$  calcd for  $\text{C}_{24}\text{H}_{35}\text{N}_2\text{O}_2$  383.2693, found: 383.2697.

**2-(5-chloro-2-(2-phenylpyrrolidin-1-yl)benzyl)-5-(diethylamino)phenol (3o)**

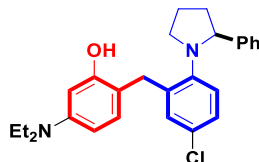

Flash column chromatography on a silica gel (ethyl acetate: petroleum ether, 1:20) gave the product (26.0 mg, 60% yield) as a yellow solid.

$^1\text{H}$  NMR (500 MHz,  $\text{CDCl}_3$ )  $\delta$  9.48 (s, 1H), 7.22 – 7.15 (m, 5H), 7.13 (d,  $J = 2.2$  Hz, 1H), 7.06 – 6.99 (m, 2H), 6.92 (d,  $J = 8.4$  Hz, 1H), 6.23 (d,  $J = 2.1$  Hz, 1H), 6.16 (dd,  $J = 8.3, 2.1$  Hz, 1H), 4.29 (t,  $J = 7.6$  Hz, 1H), 3.66 – 3.54 (m, 1H), 3.41 (s, 2H), 3.34 – 3.21 (m, 4H), 3.14 – 3.03 (m, 1H), 2.52 – 2.41 (m, 1H), 2.35 – 2.22 (m, 2H), 2.20 – 2.07 (m, 1H), 1.11 (t,  $J = 7.0$  Hz, 6H);  $^{13}\text{C}$  NMR (125 MHz,  $\text{CDCl}_3$ )  $\delta$  155.5, 148.4, 144.6, 140.7, 139.9, 130.5, 130.5, 130.4, 128.4, 128.1, 127.7, 127.1, 123.6, 114.3, 104.4, 100.2, 70.2, 55.4, 44.4, 33.1, 32.5, 23.5, 12.7. **HRMS (ESI) m/z:**  $[\text{M}+\text{H}]^+$  calcd for  $\text{C}_{27}\text{H}_{32}\text{ClN}_2\text{O}$  435.2198, found: 435.2188.

**1'-allyl-4-(diethylamino)-1',2',3',3a'-tetrahydro-5'H-spiro[cyclohexane-1,4'-pyrrolo[1,2-a]quinoline]-2,4-dien-6-one (4a)**

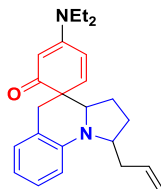

Flash column chromatography on a silica gel (ethyl acetate: petroleum ether, 1:8) gave the product (27.1 mg, 75% yield, dr 2:1) as a yellow solid.

$^1\text{H}$  NMR (500 MHz,  $\text{CDCl}_3$ )  $\delta$  7.11 (t,  $J = 7.7$  Hz, 1H), 7.04 (dd,  $J = 29.2, 7.5$  Hz, 1H), 6.56 (ddd,  $J = 32.1, 18.0, 4.4$  Hz, 2H), 6.42 (ddd,  $J = 40.3, 10.5, 2.3$  Hz, 1H), 6.23 (dd,  $J = 60.0, 10.4$  Hz, 1H), 5.80 (ddt,  $J = 17.0, 10.3, 7.1$  Hz, 1H), 5.33 (dd,  $J = 10.4, 2.3$  Hz, 1H), 5.15 – 5.04 (m, 2H), 4.02 – 3.78 (m, 2H), 3.48 (t,  $J = 16.4$  Hz, 1H), 3.43 – 3.32 (m, 4H), 2.66 – 2.51 (m, 2H), 2.23 – 1.67 (m, 4H), 1.43 – 1.32 (m, 1H), 1.29 – 1.15 (m, 6H);  $^{13}\text{C}$  NMR (125 MHz,  $\text{CDCl}_3$ )  $\delta$  197.4, 197.1, 156.6, 156.5, 144.1, 144.0, 142.1, 141.7, 135.6, 135.2, 129.8, 129.4, 127.2, 127.0, 120.7, 119.8, 118.5, 118.3, 117.3, 117.0, 115.0, 114.9, 110.9, 110.3, 96.6, 96.5, 65.6, 63.3, 58.6, 56.5, 45.9, 45.8, 44.9, 39.8, 39.4, 37.2, 36.0, 28.7, 27.8, 26.2, 25.2. **HRMS (ESI) m/z:**  $[\text{M}+\text{H}]^+$  calcd for  $\text{C}_{24}\text{H}_{31}\text{N}_2\text{O}$  363.2431, found: 363.2439.

**1'-allyl-4-(diethylamino)-8'-methyl-1',2',3',3a'-tetrahydro-5'H-spiro[cyclohexane-1,4'-pyrrolo[1,2-a]quinoline]-2,4-dien-6-one (4b)**

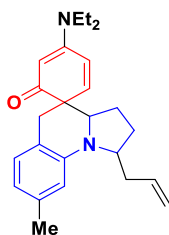

Flash column chromatography on a silica gel (ethyl acetate: petroleum ether, 1:8) gave the product (26.3 mg, 70% yield, dr 2:1) as a yellow solid.

**<sup>1</sup>H NMR** (500 MHz, CDCl<sub>3</sub>) δ 6.93 (dd, *J* = 30.3, 7.4 Hz, 1H), 6.45–6.36 (m, 2H), 6.36 – 6.15 (m, 2H), 5.89 – 5.75 (m, 1H), 5.32 (dd, *J* = 10.6, 2.0 Hz, 1H), 5.10 (dd, *J* = 16.4, 11.2 Hz, 2H), 4.00 – 3.77 (m, 2H), 3.52 – 3.25 (m, 5H), 2.66 – 2.50 (m, 2H), 2.31 (s, 3H), 2.23 – 1.72 (m, 4H), 1.39–1.30 (m, 1H), 1.25–1.19 (m, 6H); **<sup>13</sup>C NMR** (125 MHz, CDCl<sub>3</sub>) δ 197.6, 197.3, 156.6, 156.5, 144.2, 144.1, 142.0, 141.6, 136.8, 136.6, 135.7, 135.3, 129.7, 129.2, 118.3, 118.2, 117.8, 117.2, 116.9, 115.9, 115.9, 111.5, 110.9, 96.7, 96.6, 65.7, 63.3, 58.5, 56.5, 46.2, 46.0, 44.9, 39.6, 39.2, 37.2, 36.1, 29.7, 29.3, 28.7, 27.8, 26.2, 25.2, 21.7. **HRMS (ESI) m/z:** [M+H]<sup>+</sup> calcd for C<sub>25</sub>H<sub>33</sub>N<sub>2</sub>O 377.2587, found: 377.2578.

**1'-allyl-4-(diethylamino)-7'-methoxy-1',2',3',3a'-tetrahydro-5'H-spiro[cyclohexane-1,4'-pyrrolo[1,2-a]quinoline]-2,4-dien-6-one (4c)**

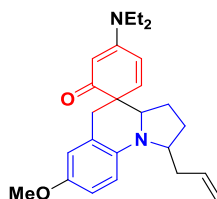

Flash column chromatography on a silica gel (ethyl acetate: petroleum ether, 1:8) gave the product (21.1 mg, 54% yield, dr 2:1) as a yellow solid.

**<sup>1</sup>H NMR** (500 MHz, CDCl<sub>3</sub>) δ 6.74–6.64 (m, 2H), 6.52 – 6.35 (m, 2H), 6.25 (dd, *J* = 63.0, 10.4 Hz, 1H), 5.86 – 5.73 (m, 1H), 5.33 (dd, *J* = 12.0, 2.2 Hz, 1H), 5.11–5.05 (m, 2H), 3.96 – 3.76 (m, 2H), 3.76 – 3.73 (m, 3H), 3.50 (dd, *J* = 16.0, 12.3 Hz, 1H), 3.44 – 3.33 (m, 4H), 2.56 (dd, *J* = 27.3, 16.2 Hz, 2H), 1.97–1.68 (m, 4H), 1.40 – 1.31 (m, 1H), 1.26 – 1.19 (m, 6H); **<sup>13</sup>C NMR** (125 MHz, CDCl<sub>3</sub>) δ 197.5, 197.1, 156.6, 156.5, 150.1, 150.0, 144.3, 144.2, 136.8, 136.4, 135.8, 135.4, 121.8, 120.9, 118.3, 118.2, 117.2, 116.9, 115.9, 115.6, 112.9, 112.8, 111.3, 110.9, 96.7, 96.6, 65.9, 63.6, 59.0, 56.7, 55.9, 46.4, 46.2, 44.9, 39.9, 39.5, 37.3, 36.3, 28.7, 27.9, 26.2, 25.3. **HRMS (ESI) m/z:** [M+H]<sup>+</sup> calcd for C<sub>25</sub>H<sub>33</sub>N<sub>2</sub>O<sub>2</sub> 393.2537, found: 393.2528.

**1'-allyl-7'-chloro-4-(diethylamino)-1',2',3',3a'-tetrahydro-5'H-spiro[cyclohexane-1,4'-pyrrolo[1,2-a]quinoline]-2,4-dien-6-one (4d)**

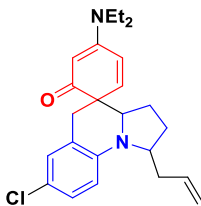

Flash column chromatography on a silica gel (ethyl acetate: petroleum ether, 1:8) gave the product (28.5 mg, 72% yield, dr 2:1) as a yellow solid.

**<sup>1</sup>H NMR** (500 MHz, CDCl<sub>3</sub>) δ 7.10 – 6.95 (m, 2H), 6.52 – 6.45 (m, 1H), 6.44 – 6.36 (m, 1H), 6.21 (d, *J* = 10.4 Hz, 1H), 6.10 (d, *J* = 10.5 Hz, 1H), 5.85 – 5.72 (m, 1H), 5.33 (dd, *J* = 9.5, 2.0 Hz, 1H), 5.11–5.07 (m, 2H), 3.94 (t, *J* = 7.0 Hz, 1H), 3.87 – 3.75 (m, 2H), 3.51 – 3.33 (m, 5H), 2.61 – 2.46 (m, 2H), 2.23 – 2.13 (m, 1H), 2.02 – 1.69 (m, 4H), 1.41 – 1.32 (m, 1H), 1.27 – 1.19 (m, 6H); **<sup>13</sup>C NMR** (125 MHz, CDCl<sub>3</sub>) δ 196.9, 196.6, 156.7, 156.5, 143.5, 143.4, 140.6, 140.2, 135.3, 134.7, 129.3, 128.9, 126.9, 126.7, 122.3, 121.4, 119.6, 119.4, 118.7, 118.6, 117.5, 117.2, 111.8, 111.1, 96.6, 96.6, 65.6, 63.3, 58.6, 56.7, 45.5, 45.4, 45.0, 39.4, 39.1, 37.0, 35.7, 28.7, 27.7, 26.1, 25.1. **HRMS (ESI) m/z**: [M+H]<sup>+</sup> calcd for C<sub>24</sub>H<sub>30</sub>ClN<sub>2</sub>O 397.2041, found: 397.2037.

**1'-allyl-4-(diethylamino)-6'-fluoro-1',2',3',3a'-tetrahydro-5'H-spiro[cyclohexane-1,4'-pyrrolo[1,2-a]quinoline]-2,4-dien-6-one (4e)**

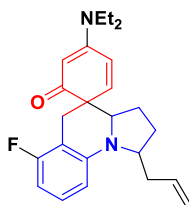

Flash column chromatography on a silica gel (ethyl acetate: petroleum ether, 1:8) gave the product (31.2 mg, 82% yield, dr 2:1) as a yellow solid.

**<sup>1</sup>H NMR** (500 MHz, CDCl<sub>3</sub>) δ 7.04 (dd, *J* = 15.0, 7.8 Hz, 1H), 6.44 (ddd, *J* = 36.8, 10.5, 2.0 Hz, 1H), 6.37 – 6.27 (m, 2H), 6.19 (dd, *J* = 47.4, 10.4 Hz, 1H), 5.83–5.74 m, 1H), 5.35 (dd, *J* = 10.8, 2.0 Hz, 1H), 5.10 (dd, *J* = 15.1, 9.2 Hz, 2H), 3.96 – 3.74 (m, 2H), 3.48 – 3.32 (m, 4H), 3.18 (dd, *J* = 31.4, 16.6 Hz, 1H), 2.83 (dd, *J* = 16.0, 11.6 Hz, 1H), 2.56–2.50 (m, 1H), 2.26 – 1.96 (m, 1H), 1.96 – 1.72 (m, 3H), 1.43 – 1.32 (m, 1H), 1.23 (q, *J* = 7.0 Hz, 6H); **<sup>13</sup>C NMR** (125 MHz, CDCl<sub>3</sub>) δ 197.1, 196.8, 163.1, 162.6, 161.2, 160.7, 156.6, 143.5, 143.4, 143.3, 135.3, 134.9, 127.5, 127.4, 127.3, 118.7, 118.6, 117.5, 117.2, 107.9, 107.8, 106.9, 106.5, 106.5, 106.1, 101.9, 101.7, 96.7, 96.6, 65.1, 62.6, 59.1, 57.0, 45.1, 45.0, 44.9, 37.0, 36.1, 32.2, 32.1, 31.9, 28.5, 27.7, 26.0, 25.2. **HRMS (ESI) m/z**: [M+H]<sup>+</sup> calcd for C<sub>24</sub>H<sub>30</sub>FN<sub>2</sub>O 381.2337, found: 381.2330.

**1'-allyl-6'-chloro-4-(diethylamino)-1',2',3',3a'-tetrahydro-5'H-spiro[cyclohexane-1,4'-pyrrolo[1,2-a]quinoline]-2,4-dien-6-one (4f)**

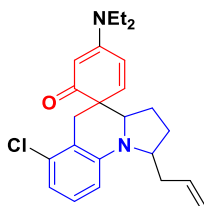

Flash column chromatography on a silica gel (ethyl acetate: petroleum ether, 1:8) gave the product (30.8 mg, 78% yield, dr 2:1) as a yellow solid.

**<sup>1</sup>H NMR** (500 MHz, CDCl<sub>3</sub>) δ 7.03 (t, *J* = 8.1 Hz, 1H), 6.72 – 6.62 (m, 1H), 6.47 (dd, *J* = 10.3, 2.0 Hz, 1H), 6.44 – 6.37 (m, 1H), 6.19 (dd, *J* = 51.4, 10.4 Hz, 1H), 5.83–5.73 (m, 1H), 5.36 (dd, *J* = 11.4, 2.2 Hz, 1H), 5.16 – 5.04 (m, 2H), 3.95 – 3.73 (m, 2H), 3.50 – 3.33 (m, 4H), 3.26 (dd, *J* = 22.9, 16.9 Hz, 1H), 2.97–2.89 (t, *J* = 18.1 Hz, 1H), 2.55–2.48 (m, 1H), 2.20 – 1.70 (m, 5H), 1.43 – 1.33 (m, 1H), 1.23 (q, *J* = 6.9 Hz, 6H); **<sup>13</sup>C NMR** (125 MHz, CDCl<sub>3</sub>) δ 196.9, 196.6, 156.6, 143.7, 143.6, 143.3, 143.1, 135.4, 135.3, 134.85, 127.4, 127.3, 118.7, 118.6, 118.6, 117.7, 117.6, 117.3, 116.0, 115.9, 109.2, 108.9, 96.8, 96.6,



65.0, 62.5, 59.0, 56.9, 45.9, 45.7, 45.0, 37.1, 36.8, 36.7, 36.1, 28.5, 27.9, 25.9, 25.2. **HRMS (ESI) m/z:**  $[M+H]^+$  calcd for  $C_{24}H_{30}ClN_2O$  397.2041, found: 397.2034.

**1'-allyl-6'-bromo-4-(diethylamino)-1',2',3',3a'-tetrahydro-5'H-spiro[cyclohexane-1,4'-pyrrolo[1,2-a]quinoline]-2,4-dien-6-one (4g)**

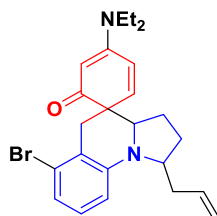

Flash column chromatography on a silica gel (ethyl acetate: petroleum ether, 1:8) gave the product (27.3 mg, 62% yield, dr 2:1) as a yellow solid.

**$^1H$  NMR** (500 MHz,  $CDCl_3$ )  $\delta$  6.95 (t,  $J$  = 8.0 Hz, 1H), 6.86-6.82 (m, 1H), 6.54 – 6.38 (m, 2H), 6.19 (dd,  $J$  = 51.6, 10.4 Hz, 1H), 5.83-5.73 (m, 1H), 5.36 (dd,  $J$  = 11.4, 2.2 Hz, 1H), 5.15 – 5.05 (m, 2H), 3.94 – 3.74 (m, 2H), 3.48 – 3.34 (m, 4H), 3.30-3.24 (m, 1H), 2.94-2.86 (m, 1H), 2.53 (dd,  $J$  = 14.1, 5.1 Hz, 1H), 2.23 – 1.88 (m, 2H), 1.88 – 1.69 (m, 3H), 1.43 – 1.33 (m, 1H), 1.24 (t,  $J$  = 7.0 Hz, 6H);  **$^{13}C$  NMR** (125 MHz,  $CDCl_3$ )  $\delta$  196.8, 196.5, 156.6, 143.6, 143.5, 143.4, 143.2, 135.3, 134.8, 127.9, 127.8, 126.3, 125.9, 120.3, 119.2, 119.2, 118.6, 118.6, 117.6, 117.3, 109.9, 109.6, 96.8, 96.6, 65.1, 62.6, 59.0, 56.9, 46.2, 46.0, 45.0, 40.1, 39.8, 36.7, 36.0, 28.6, 27.9, 25.9, 25.1. **HRMS (ESI) m/z:**  $[M+H]^+$  calcd for  $C_{24}H_{30}BrN_2O$  441.1536, found: 441.1527.

**11'-allyl-4-(diethylamino)-6a',6b',7',8',9',10',10a',11'-octahydro-5'H-spiro[cyclohexane-1,6'-isoindolo[2,1-a]quinoline]-2,4-dien-6-one (4h)**

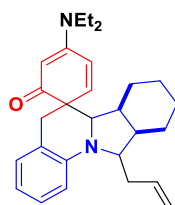

Flash column chromatography on a silica gel (ethyl acetate: petroleum ether, 1:8) gave the product (22.0 mg, 53% yield, dr 7:1) as a yellow oil.

**$^1H$  NMR** (500 MHz,  $CDCl_3$ )  $\delta$  7.10 (t,  $J$  = 7.7 Hz, 1H), 7.05 (d,  $J$  = 7.3 Hz, 1H), 6.56 (dd,  $J$  = 13.0, 5.7 Hz, 1H), 6.48 (d,  $J$  = 8.1 Hz, 1H), 6.42 (dd,  $J$  = 10.5, 2.2 Hz, 1H), 6.23 (d,  $J$  = 10.4 Hz, 1H), 5.86 – 5.75 (m, 1H), 5.32 (d,  $J$  = 2.2 Hz, 1H), 5.09 (d,  $J$  = 5.3 Hz, 1H), 5.07 (s, 1H), 4.05 (d,  $J$  = 10.3 Hz, 1H), 3.52 (dd,  $J$  = 16.2, 7.8 Hz, 1H), 3.46 – 3.32 (m, 4H), 2.61 (d,  $J$  = 16.2 Hz, 1H), 2.58 – 2.50 (m, 1H), 2.02 – 1.89 (m, 2H), 1.89 – 1.82 (m, 1H), 1.78 – 1.70 (m, 2H), 1.69 – 1.57 (m, 2H), 1.46 – 1.37 (m, 3H), 1.33 – 1.25 (m, 2H), 1.22 (t,  $J$  = 7.2 Hz, 6H);  **$^{13}C$  NMR** (125 MHz,  $CDCl_3$ )  $\delta$  197.2, 156.4, 144.3, 142.0, 135.8, 129.5, 126.9, 120.5, 118.2, 116.7, 114.7, 110.9, 97.2, 64.2, 62.9, 45.4, 44.9, 41.6, 40.5, 37.6, 34.9, 29.0, 26.2, 25.6, 21.6. **HRMS (ESI) m/z:**  $[M+H]^+$  calcd for  $C_{28}H_{37}N_2O$  417.2900, found: 417.2888.

**7'-chloro-4-(diethylamino)-1'-methyl-1',2',3',3a'-tetrahydro-5'H-spiro[cyclohexane-1,4'-pyrrolo[1,2-a]quinoline]-2,4-dien-6-one (4i)**

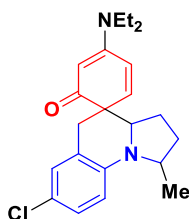

Flash column chromatography on a silica gel (ethyl acetate: petroleum ether, 1:8) gave the product (22.6 mg, 61% yield, dr 2:1) as a yellow oil.

**<sup>1</sup>H NMR** (500 MHz, CDCl<sub>3</sub>) δ 6.95-6.88 (m, 2H), 6.44 – 6.37 (m, 1H), 6.33 (dd, *J* = 15.4, 5.2 Hz, 1H), 6.08 (dd, *J* = 42.9, 10.4 Hz, 1H), 5.25 (dd, *J* = 9.0, 1.7 Hz, 1H), 3.90-3.85 (m, 1H), 3.85 – 3.68 (m, 1H), 3.43 – 3.24 (m, 5H), 2.46 (dd, *J* = 22.1, 16.1 Hz, 1H), 2.02 – 1.70 (m, 2H), 1.53-1.46 (m, 1H), 1.36-1.26 (m, 1H), 1.19 – 1.09 (m, 7H), 0.98 (d, *J* = 6.1 Hz, 2H); **<sup>13</sup>C NMR** (125 MHz, CDCl<sub>3</sub>) δ 196.9, 196.7, 156.6, 156.5, 143.6, 143.4, 140.8, 140.4, 129.2, 128.8, 126.9, 126.7, 121.9, 121.5, 119.2, 119.1, 118.7, 118.5, 111.9, 111.1, 96.5, 65.7, 62.8, 54.3, 52.2, 45.4, 45.1, 44.9, 39.5, 39.2, 31.8, 31.0, 26.1, 25.2, 19.0, 17.8. **HRMS (ESI) *m/z***: [M+H]<sup>+</sup> calcd for C<sub>22</sub>H<sub>28</sub>ClN<sub>2</sub>O 371.1885, found: 371.1875.

**DEPT 90 <sup>13</sup>C NMR** (126 MHz, CDCl<sub>3</sub>) δ 143.6, 143.4, 129.2, 128.8, 126.9, 126.7, 118.7, 118.5, 111.9, 111.1, 96.5, 65.7, 62.8, 54.3, 52.2.

**7'-chloro-4-(diethylamino)-1'-phenyl-1',2',3',3a'-tetrahydro-5'H-spiro[cyclohexane-1,4'-pyrrolo[1,2-a]quinoline]-2,4-dien-6-one (4j)**

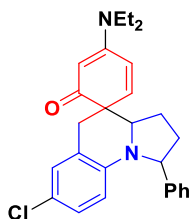

Flash column chromatography on a silica gel (ethyl acetate: petroleum ether, 1:8) gave the product (25.9 mg, 60% yield, dr 2:1) as a yellow oil.

**<sup>1</sup>H NMR** (500 MHz, CDCl<sub>3</sub>) δ 7.32-7.28 (m, 2H), 7.25 – 7.19 (m, 3H), 7.04-6.98 (m, 1H), 6.87 – 6.80 (m, 1H), 6.71 (d, *J* = 10.4 Hz, 1H), 6.61-6.41 (m, 1H), 6.13 (dd, *J* = 26.3, 9.6 Hz, 2H), 5.37 (dd, *J* = 11.4, 2.2 Hz, 1H), 4.73 – 4.54 (m, 1H), 4.33 (t, *J* = 7.1 Hz, 1H), 3.86 (dd, *J* = 11.2, 4.6 Hz, 1H), 3.58 (dd, *J* = 24.5, 16.1 Hz, 1H), 3.41-3.37 (m, 4H), 2.63 (t, *J* = 16.6 Hz, 1H), 2.48 – 2.29 (m, 1H), 2.04-1.96 (m, 1H), 1.88 – 1.74 (m, 2H), 1.58 – 1.40 (m, 1H), 1.26-1.22 (m, 6H), 0.91 – 0.82 (m, 1H); **<sup>13</sup>C NMR** (125 MHz, CDCl<sub>3</sub>) δ 196.9, 196.2, 156.5, 145.0, 144.2, 143.8, 143.4, 141.5, 140.8, 128.9, 128.8, 128.7, 126.9, 126.9, 126.6, 125.9, 125.5, 123.0, 121.5, 120.8, 120.0, 118.8, 118.8, 113.4, 112.4, 96.6, 96.4, 66.8, 65.7, 64.6, 61.9, 46.9, 45.5, 45.0, 39.7, 38.9, 35.6, 34.1, 26.9, 25.3. **HRMS (ESI) *m/z***: [M+H]<sup>+</sup> calcd for C<sub>27</sub>H<sub>30</sub>ClN<sub>2</sub>O 433.2041, found: 433.2029.

**1'-allyl-4-(pyrrolidin-1-yl)-1',2',3',3a'-tetrahydro-5'H-spiro[cyclohexane-1,4'-pyrrolo[1,2-a]quinoline]-2,4-dien-6-one (4k)**

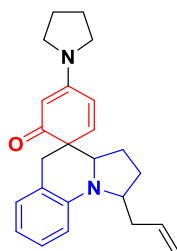

Flash column chromatography on a silica gel (ethyl acetate: petroleum ether, 1:8) gave the product (21.6 mg, 60% yield, dr 2:1) as a yellow solid.

**<sup>1</sup>H NMR** (500 MHz, CDCl<sub>3</sub>) δ 7.11 (t, *J* = 7.7 Hz, 1H), 7.03 (dd, *J* = 30.5, 7.5 Hz, 1H), 6.61 – 6.48 (m, 2H), 6.39 (ddd, *J* = 39.1, 10.3, 2.1 Hz, 1H), 6.22 (dd, *J* = 60.2, 10.3 Hz, 1H), 5.86 – 5.75 (m, 1H), 5.21 (dd, *J* = 9.9, 2.0 Hz, 1H), 5.14 – 5.05 (m, 2H), 4.02 – 3.79 (m, 2H), 3.63 – 3.44 (m, 3H), 3.33 (s, 2H), 2.62–2.52 (m, 2H), 2.11–1.98 (m, 4H), 1.98 – 1.67 (m, 4H), 1.44 – 1.32 (m, 1H); **<sup>13</sup>C NMR** (125 MHz, CDCl<sub>3</sub>) δ 197.1, 196.7, 155.9, 155.9, 144.1, 144.1, 142.1, 141.7, 135.6, 135.2, 129.8, 129.4, 127.2, 127.1, 120.7, 119.9, 119.8, 119.7, 117.3, 117.0, 115.0, 114.9, 110.9, 110.3, 97.0, 96.9, 65.6, 63.2, 58.6, 56.6, 48.2, 47.9, 46.4, 46.2, 40.0, 39.6, 37.2, 36.0, 28.7, 27.8, 26.2, 25.4, 25.3, 24.8. **HRMS (ESI) m/z**: [M+H]<sup>+</sup> calcd for C<sub>24</sub>H<sub>29</sub>N<sub>2</sub>O 361.2274, found: 361.2266.

#### 6-(2-(pyrrolidin-1-yl-2-d)benzyl)benzo[d][1,3]dioxol-5-ol (5a)

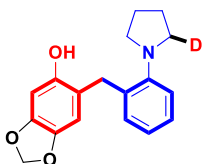

Flash column chromatography on a silica gel (ethyl acetate: petroleum ether, 1:10) gave the product (24.4 mg, 82% yield) as a yellow solid.

**<sup>1</sup>H NMR** (500 MHz, CDCl<sub>3</sub>) δ 10.96 (s, 1H), 7.32 (d, *J* = 7.5 Hz, 1H), 7.21 – 7.15 (m, 2H), 7.12 – 7.06 (m, 1H), 6.72 (s, 1H), 6.39 (s, 1H), 5.80 (s, 2H), 3.81 (s, 2H), 3.17 (d, *J* = 6.1 Hz, 3H), 2.09 – 2.04 (m, 4H); **<sup>13</sup>C NMR** (125 MHz, CDCl<sub>3</sub>) δ 150.3, 146.9, 146.4, 140.5, 137.4, 130.8, 127.6, 125.9, 120.2, 119.3, 108.7, 100.7, 99.1, 54.1, 53.9, 53.7, 53.6, 33.8, 23.9, 23.8. **HRMS (ESI) m/z**: [M+H]<sup>+</sup> calcd for C<sub>18</sub>H<sub>19</sub>DNO<sub>3</sub> 299.1500, found: 299.1487.

#### 5-(diethylamino)-2-(2-(pyrrolidin-1-yl-2-d)benzyl)phenol (5b)

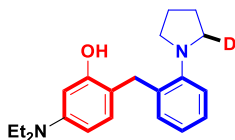

Flash column chromatography on a silica gel (ethyl acetate: petroleum ether, 1:20) gave the product (20.4 mg, 63% yield) as a yellow solid.

**<sup>1</sup>H NMR** (500 MHz, CDCl<sub>3</sub>) δ 10.89 (s, 1H), 7.33 (d, *J* = 7.4 Hz, 1H), 7.16 (t, *J* = 9.0 Hz, 2H), 7.09 – 7.02 (m, 2H), 6.19 (d, *J* = 2.1 Hz, 1H), 6.15 (dd, *J* = 8.3, 2.2 Hz, 1H), 3.80 (s, 2H), 3.26 (q, *J* = 7.0 Hz, 4H), 3.21 – 3.12 (m, 3H), 2.07 (d, *J* = 2.9 Hz, 4H), 1.09 (t, *J* = 7.0 Hz, 6H); **<sup>13</sup>C NMR** (125 MHz, CDCl<sub>3</sub>) δ 156.3, 148.4, 146.1, 137.9, 130.9, 130.3, 127.3, 125.8, 119.8, 115.3, 103.8, 100.1, 53.8, 44.4, 33.3, 29.7, 23.8, 23.7, 12.7. **HRMS (ESI) m/z**: [M+H]<sup>+</sup> calcd for C<sub>21</sub>H<sub>28</sub>DN<sub>2</sub>O 326.2337, found: 326.2330.

**5-(diethylamino)-2-(3-fluoro-2-(pyrrolidin-1-yl-2-d)benzyl)phenol (5c)**

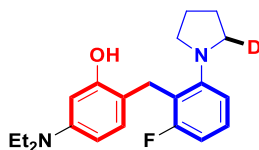

Flash column chromatography on a silica gel (ethyl acetate: petroleum ether, 1:20) gave the product (18.5 mg, 54% yield) as a yellow solid.

**<sup>1</sup>H NMR** (500 MHz, CDCl<sub>3</sub>) δ 10.60 (s, 1H), 7.18 (dd, *J* = 8.3, 2.8 Hz, 1H), 7.08 (dt, *J* = 8.1, 4.1 Hz, 1H), 6.96 (d, *J* = 8.1 Hz, 1H), 6.85 – 6.79 (m, 1H), 6.17 (dt, *J* = 8.3, 2.6 Hz, 2H), 3.84 (d, *J* = 2.5 Hz, 2H), 3.26 (q, *J* = 7.0 Hz, 4H), 3.18 (dd, *J* = 11.4, 4.8 Hz, 3H), 2.06 (dd, *J* = 6.4, 3.1 Hz, 4H), 1.10 (t, *J* = 7.0 Hz, 6H); **<sup>13</sup>C NMR** (125 MHz, CDCl<sub>3</sub>) δ 162.1 (d, *J* = 242.5 Hz), 161.1, 156.5, 148.3, 148.1 (d, *J* = 6.3 Hz), 131.5 (d, *J* = 2.9 Hz), 127.5 (d, *J* = 10.2 Hz), 125.2 (d, *J* = 16.0 Hz), 115.4 (d, *J* = 2.9 Hz), 113.2, 112.8, 112.6, 103.7, 99.7, 53.9, 44.3, 25.1, 25.0, 23.8, 23.7, 12.7. **HRMS (ESI) m/z**: [M+H]<sup>+</sup> calcd for C<sub>21</sub>H<sub>27</sub>DFN<sub>2</sub>O 344.2243, found: 344.2236.

**2-(2-(2-allylpyrrolidin-1-yl-5-d)-4-methylbenzyl)-5-(diethylamino)phenol (5d)**

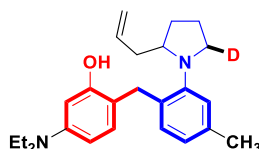

Flash column chromatography on a silica gel (ethyl acetate: petroleum ether, 1:20) gave the product (23.8 mg, 63% yield) as a yellow solid.

**<sup>1</sup>H NMR** (500 MHz, CDCl<sub>3</sub>) δ 10.33 (s, 1H), 7.24 (d, *J* = 7.7 Hz, 1H), 7.04 (d, *J* = 8.3 Hz, 1H), 6.94 (s, 1H), 6.89 (d, *J* = 7.7 Hz, 1H), 6.21 (d, *J* = 1.8 Hz, 1H), 6.16 (d, *J* = 8.3 Hz, 1H), 5.80 – 5.65 (m, 1H), 5.08 – 4.95 (m, 2H), 3.86 (d, *J* = 14.1 Hz, 1H), 3.64 (d, *J* = 14.1 Hz, 1H), 3.55 (dd, *J* = 8.0, 4.5 Hz, 1H), 3.43 – 3.34 (m, 1H), 3.32 – 3.20 (m, 4H), 2.81 (t, *J* = 8.0 Hz, 1H), 2.31 (s, 1H), 2.28 (d, *J* = 9.5 Hz, 3H), 2.24 – 2.16 (m, 1H), 2.10 (tdd, *J* = 12.1, 9.2, 6.0 Hz, 2H), 1.95 (dt, *J* = 9.9, 6.8 Hz, 1H), 1.85 – 1.76 (m, 1H), 1.10 (t, *J* = 7.0 Hz, 6H), 0.90 – 0.79 (m, 1H); **<sup>13</sup>C NMR** (125 MHz, CDCl<sub>3</sub>) δ 154.7, 147.2, 143.7, 135.8, 135.1, 134.5, 129.8, 129.2, 125.5, 120.6, 115.6, 114.7, 103.1, 99.4, 62.0, 43.3, 35.5, 31.8, 28.4, 20.9, 20.2, 11.6. **HRMS (ESI) m/z**: [M+H]<sup>+</sup> calcd for C<sub>25</sub>H<sub>34</sub>DN<sub>2</sub>O 380.2807, found: 380.2800.

**2-(3-chloro-2-(2,5-diallylpyrrolidin-1-yl)benzyl)-5-(diethylamino)phenol (6f)**

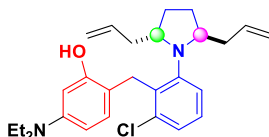

Flash column chromatography on a silica gel (ethyl acetate: petroleum ether, 1:20) gave the product (23.2 mg, 53% yield) as a yellow solid.

**<sup>1</sup>H NMR** (500 MHz, CDCl<sub>3</sub>) δ 9.83 (s, 1H), 7.46 (d, *J* = 8.5 Hz, 1H), 7.18 (d, *J* = 7.8 Hz, 1H), 7.08 (t, *J* = 8.0 Hz, 1H), 6.99 (d, *J* = 8.0 Hz, 1H), 6.20 (d, *J* = 2.0 Hz, 1H), 6.17 (d, *J* = 8.5 Hz, 1H), 5.80-5.72 (m, 1H), 5.56 – 5.48 (m, 1H), 5.08 – 4.91 (m, 4H), 4.10 (d, *J* = 14.5 Hz, 1H), 4.04-3.98 (m, 1H), 3.87 (d, *J* =

14.5 Hz, 1H), 3.65 – 3.56 (m, 1H), 3.33 – 3.22 (m, 4H), 2.38 – 2.16 (m, 4H), 1.88 – 1.70 (m, 4H), 1.11 (t,  $J = 7.0$  Hz, 6H);  $^{13}\text{C}$  NMR (125 MHz,  $\text{CDCl}_3$ )  $\delta$  156.2, 148.3, 143.9, 136.3, 135.5, 134.7, 132.1, 126.8, 126.7, 121.9, 117.5, 116.7, 113.0, 103.6, 99.8, 62.0, 59.2, 44.3, 36.3, 36.0, 29.7, 29.0, 28.8, 27.9, 12.7. **HRMS (ESI)  $m/z$ :**  $[\text{M}+\text{H}]^+$  calcd for  $\text{C}_{27}\text{H}_{36}\text{ClN}_2\text{O}$  439.2511, found: 439.2500.

#### 5-methoxy-3-(2-(pyrrolidin-1-yl)benzyl)-1H-indole (7)

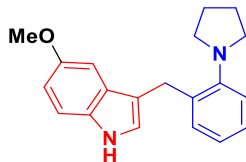

Flash column chromatography on a silica gel (ethyl acetate: petroleum ether, 1:20) gave the product (20.8 mg, 68% yield) as a yellow solid.

$^1\text{H}$  NMR (500 MHz,  $\text{CDCl}_3$ )  $\delta$  7.72 (s, 1H), 7.10 (dd,  $J = 15.5, 8.7$  Hz, 3H), 6.99 (d,  $J = 4.1$  Hz, 1H), 6.94 (d,  $J = 2.4$  Hz, 1H), 6.81 (dd,  $J = 5.6, 2.0$  Hz, 2H), 6.69 (s, 1H), 4.08 (s, 2H), 3.76 (d,  $J = 2.4$  Hz, 3H), 3.15 (s, 4H), 1.84 (d,  $J = 2.7$  Hz, 4H);  $^{13}\text{C}$  NMR (125 MHz,  $\text{CDCl}_3$ )  $\delta$  153.9, 149.2, 132.4, 131.7, 131.2, 128.3, 126.7, 123.6, 121.1, 116.9, 116.1, 112.1, 111.9, 101.1, 56.0, 51.9, 28.3, 25.0. **HRMS (ESI)  $m/z$ :**  $[\text{M}+\text{H}]^+$  calcd for  $\text{C}_{20}\text{H}_{23}\text{N}_2\text{O}$  307.1805, found: 307.1796.

#### 5-methoxy-1',2',3',3a'-tetrahydro-5'H-spiro[indole-3,4'-pyrrolo[1,2-a]quinoline] (11)<sup>[4]</sup>

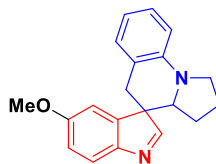

#### Prepared According to the Literature.<sup>[4]</sup>

Flash column chromatography on a neutral alumina (ethyl acetate: petroleum ether, 1:15) gave the product as inseparable diastereomers (dr = 1:1) as a white solid.

$^1\text{H}$  NMR (500 MHz,  $\text{CDCl}_3$ )  $\delta$  7.94 (d,  $J = 2.6$  Hz, 1H), 7.80 (d,  $J = 2.6$  Hz, 1H), 7.57 (dd,  $J = 8.4, 2.6$  Hz, 1H), 7.53 (dd,  $J = 8.4, 2.6$  Hz, 1H), 7.19 (dd,  $J = 15.1, 7.3$  Hz, 2H), 7.03 (d,  $J = 7.0$  Hz, 1H), 6.95 (d,  $J = 7.0$  Hz, 1H), 6.92 – 6.86 (m, 1H), 6.83 – 6.77 (m, 1H), 6.74 (d,  $J = 2.1$  Hz, 1H), 6.67 – 6.60 (m, 2H), 6.57 (d,  $J = 3.0$  Hz, 2H), 6.12 (d,  $J = 2.1$  Hz, 1H), 4.18 – 4.07 (m, 1H), 3.96 – 3.87 (m, 1H), 3.87 – 3.77 (m, 3H), 3.58–3.55 (m, 4H), 3.49 (dd,  $J = 18.8, 9.8$  Hz, 2H), 3.40 (d,  $J = 16.2$  Hz, 1H), 3.33 – 3.25 (m, 1H), 3.24 – 3.15 (m, 1H), 2.61 (d,  $J = 16.1$  Hz, 1H), 2.42 (d,  $J = 15.5$  Hz, 1H), 1.98 (d,  $J = 5.2$  Hz, 1H), 1.92 – 1.80 (m, 3H), 1.78–1.66 (m, 1H), 1.58–1.48 (m, 1H), 1.05 – 0.92 (m, 1H), 0.75–0.63 (m, 1H);  $^{13}\text{C}$  NMR (125 MHz,  $\text{CDCl}_3$ )  $\delta$  174.8, 173.2, 159.0, 158.4, 149.8, 149.4, 144.0, 143.8, 142.8, 140.2, 129.7, 128.7, 128.3, 128.0, 121.7, 121.2, 119.8, 117.2, 115.9, 115.8, 112.6, 112.5, 110.9, 110.6, 110.1, 108.4, 62.9, 60.2, 57.0, 56.8, 55.8, 55.4, 47.4, 36.1, 34.2, 27.6, 27.1, 23.5, 23.3. **HRMS (ESI)  $m/z$ :**  $[\text{M}+\text{H}]^+$  calcd for  $\text{C}_{20}\text{H}_{21}\text{N}_2\text{O}$  305.1648, found: 305.1651.

#### 2-allyl-5-methoxy-1',2',3',3a'-tetrahydro-5'H-spiro[indoline-3,4'-pyrrolo[1,2-a]quinoline] (12)

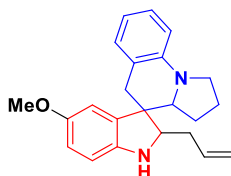

Flash column chromatography on a silica gel (ethyl acetate: petroleum ether, 1:20) gave the separable diastereomers (31.8 mg, 92% yield, dr 1:1) as a yellow oil.

**<sup>1</sup>H NMR** (500 MHz, CDCl<sub>3</sub>) δ 7.12 (t, *J* = 7.7 Hz, 1H), 6.93 (d, *J* = 7.3 Hz, 1H), 6.60 – 6.49 (m, 3H), 6.44 (d, *J* = 8.0 Hz, 1H), 5.96 (d, *J* = 1.8 Hz, 1H), 5.90 – 5.77 (m, 1H), 5.25-5.13 (m, 2H), 3.62-3.54 (m, 2H), 3.47-3.44 (m, 1H), 3.43 (s, 3H), 3.20 (dd, *J* = 16.6, 9.2 Hz, 1H), 3.07 (d, *J* = 15.2 Hz, 1H), 2.77 (d, *J* = 15.3 Hz, 1H), 2.45 – 2.36 (m, 1H), 2.35 – 2.25 (m, 1H), 2.04-1.97 (m, 1H), 1.97 – 1.86 (m, 2H), 1.40-1.30 (m, 1H); **<sup>13</sup>C NMR** (125 MHz, CDCl<sub>3</sub>) δ 153.2, 144.3, 144.0, 135.9, 132.6, 129.5, 127.7, 119.3, 118.1, 115.4, 112.7, 112.2, 109.3, 109.1, 65.5, 64.4, 55.5, 47.3, 46.2, 35.5, 35.0, 28.8, 23.7. **HRMS (ESI)** *m/z*: [M+H]<sup>+</sup> calcd for C<sub>23</sub>H<sub>27</sub>N<sub>2</sub>O 347.2118, found: 347.2106.

## Reference

1. Jurberg, I. D.; Peng, B.; Wgstefeld, E.; Wasserloos, M.; Maulide, N. *Angew. Chem. Int. Ed.* **2012**, *51*, 1950.
2. Adili, A.; Tao, Z.-L.; Chen, D.-F.; Han, Z.-Y. *Org. Biomol. Chem.* **2015**, *13*, 2247.
3. Li, S.-S.; Lv, X.; Ren, D.; Shao, C.-L.; Liu, Q.; Xiao, J. *Chem. Sci.* **2018**, *9*, 8253.
4. Bai, G.; Dong, F.; Xu, L.; Liu, Y.; Wang, L.; Li, S.-S. *Org. Lett.* **2019**, *21*, 6225.

## 5. Crystal Structures and Data

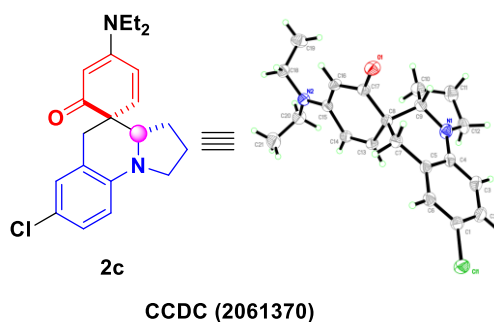

Table 1. Crystal data and structure refinement for **2c**.

|                                   |                                                                                                                         |
|-----------------------------------|-------------------------------------------------------------------------------------------------------------------------|
| Identification code               | <b>2c</b>                                                                                                               |
| Empirical formula                 | C <sub>21</sub> H <sub>25</sub> ClN <sub>2</sub> O                                                                      |
| Formula weight                    | 356.88                                                                                                                  |
| Temperature                       | 293(2) K                                                                                                                |
| Wavelength                        | 1.54184 Å                                                                                                               |
| Crystal system, space group       | Monoclinic, P2(1)/c                                                                                                     |
| Unit cell dimensions              | a = 15.3242(6) Å    alpha = 90 deg.<br>b = 13.8242(5) Å    beta = 104.165(4) deg.<br>c = 9.0303(4) Å    gamma = 90 deg. |
| Volume                            | 1854.85(13) Å <sup>3</sup>                                                                                              |
| Z, Calculated density             | 4, 1.278 Mg/m <sup>3</sup>                                                                                              |
| Absorption coefficient            | 1.896 mm <sup>-1</sup>                                                                                                  |
| F(000)                            | 760                                                                                                                     |
| Crystal size                      | 0.230 x 0.220 x 0.210 mm                                                                                                |
| Theta range for data collection   | 4.368 to 67.243 deg.                                                                                                    |
| Limiting indices                  | -18 ≤ h ≤ 17, -16 ≤ k ≤ 12, -10 ≤ l ≤ 10                                                                                |
| Reflections collected / unique    | 6379 / 3327 [R(int) = 0.0208]                                                                                           |
| Completeness to theta = 67.243    | 99.9 %                                                                                                                  |
| Refinement method                 | Full-matrix least-squares on F <sup>2</sup>                                                                             |
| Data / restraints / parameters    | 3327 / 0 / 229                                                                                                          |
| Goodness-of-fit on F <sup>2</sup> | 1.057                                                                                                                   |
| Final R indices [I > 2σ(I)]       | R1 = 0.0407, wR2 = 0.1046                                                                                               |
| R indices (all data)              | R1 = 0.0502, wR2 = 0.1108                                                                                               |
| Extinction coefficient            | 0.0041(3)                                                                                                               |
| Largest diff. peak and hole       | 0.182 and -0.168 e.Å <sup>-3</sup>                                                                                      |

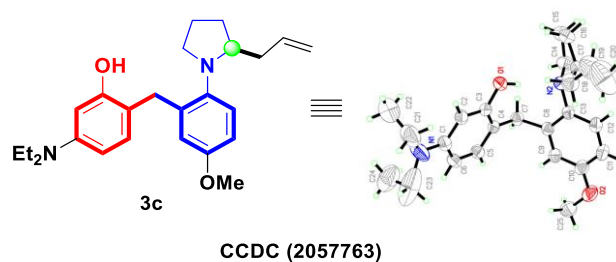

Table S2. Crystal data and structure refinement for **3c**.

|                                   |                                                                                                                           |
|-----------------------------------|---------------------------------------------------------------------------------------------------------------------------|
| Identification code               | <b>3c</b>                                                                                                                 |
| Empirical formula                 | C <sub>25</sub> H <sub>34</sub> N <sub>2</sub> O <sub>2</sub>                                                             |
| Formula weight                    | 394.54                                                                                                                    |
| Temperature                       | 293(2) K                                                                                                                  |
| Wavelength                        | 1.54184 Å                                                                                                                 |
| Crystal system, space group       | Trigonal, R-3                                                                                                             |
| Unit cell dimensions              | a = 34.3408(11) Å      alpha = 90 deg.<br>b = 34.3408(11) Å      beta = 90 deg.<br>c = 10.4316(3) Å      gamma = 120 deg. |
| Volume                            | 10653.8(6) Å <sup>3</sup>                                                                                                 |
| Z, Calculated density             | 18, 1.107 Mg/m <sup>3</sup>                                                                                               |
| Absorption coefficient            | 0.545 mm <sup>-1</sup>                                                                                                    |
| F(000)                            | 3852                                                                                                                      |
| Crystal size                      | 0.12 x 0.12 x 0.11 mm                                                                                                     |
| Theta range for data collection   | 2.57 to 67.19 deg.                                                                                                        |
| Limiting indices                  | -40 ≤ h ≤ 41, -27 ≤ k ≤ 41, -12 ≤ l ≤ 12                                                                                  |
| Reflections collected / unique    | 23249 / 4238 [R(int) = 0.0452]                                                                                            |
| Completeness to theta = 67.19     | 100.0 %                                                                                                                   |
| Max. and min. transmission        | 0.9425 and 0.9375                                                                                                         |
| Refinement method                 | Full-matrix least-squares on F <sup>2</sup>                                                                               |
| Data / restraints / parameters    | 4238 / 6 / 287                                                                                                            |
| Goodness-of-fit on F <sup>2</sup> | 1.048                                                                                                                     |
| Final R indices [I > 2σ(I)]       | R1 = 0.0732, wR2 = 0.2217                                                                                                 |
| R indices (all data)              | R1 = 0.1047, wR2 = 0.2539                                                                                                 |
| Extinction coefficient            | 0.00032(7)                                                                                                                |
| Largest diff. peak and hole       | 0.464 and -0.221 e.Å <sup>-3</sup>                                                                                        |



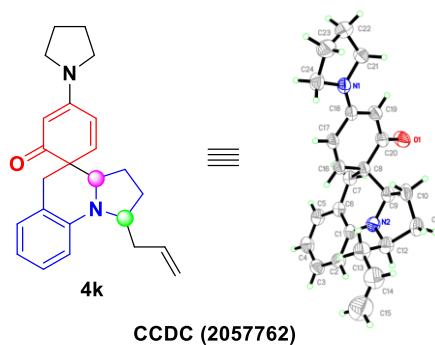

Table S3. Crystal data and structure refinement for **4k**.

|                                   |                                                                                                                                        |
|-----------------------------------|----------------------------------------------------------------------------------------------------------------------------------------|
| Identification code               | <b>4k</b>                                                                                                                              |
| Empirical formula                 | C <sub>24</sub> H <sub>28</sub> N <sub>2</sub> O                                                                                       |
| Formula weight                    | 360.22                                                                                                                                 |
| Temperature                       | 293(2) K                                                                                                                               |
| Wavelength                        | 1.54184 Å                                                                                                                              |
| Crystal system, space group       | triclinic, P -1                                                                                                                        |
| Unit cell dimensions              | a = 11.9297(10) Å    alpha = 75.136(9) deg.<br>b = 12.9240(9) Å    beta = 78.644(10) deg.<br>c = 13.666(2) Å    gamma = 89.902(6) deg. |
| Volume                            | 1994.0(4) Å <sup>3</sup>                                                                                                               |
| Z, Calculated density             | 2, 1.199 Mg/m <sup>3</sup>                                                                                                             |
| Absorption coefficient            | 0.567 mm <sup>-1</sup>                                                                                                                 |
| F(000)                            | 774                                                                                                                                    |
| Crystal size                      | 0.08 x 0.08 x 0.07 mm                                                                                                                  |
| Theta range for data collection   | 3.42 to 67.24 deg.                                                                                                                     |
| Limiting indices                  | -14 ≤ h ≤ 13, -10 ≤ k ≤ 15, -15 ≤ l ≤ 16                                                                                               |
| Reflections collected / unique    | 13345 / 7100 [R(int) = 0.0415]                                                                                                         |
| Completeness to theta = 67.24     | 99.3 %                                                                                                                                 |
| Max. and min. transmission        | 0.9614 and 0.9561                                                                                                                      |
| Refinement method                 | Full-matrix least-squares on F <sup>2</sup>                                                                                            |
| Data / restraints / parameters    | 7100 / 6 / 487                                                                                                                         |
| Goodness-of-fit on F <sup>2</sup> | 1.071                                                                                                                                  |
| Final R indices [I > 2sigma(I)]   | R1 = 0.1157, wR2 = 0.2884                                                                                                              |
| R indices (all data)              | R1 = 0.1753, wR2 = 0.3647                                                                                                              |
| Largest diff. peak and hole       | 0.612 and -0.477 e.Å <sup>-3</sup>                                                                                                     |

## 6. $^1\text{H}$ and $^{13}\text{C}$ NMR Spectra

### 5-(diethylamino)-2-(2-(pyrrolidin-1-yl)benzyl)phenol (**1a**)

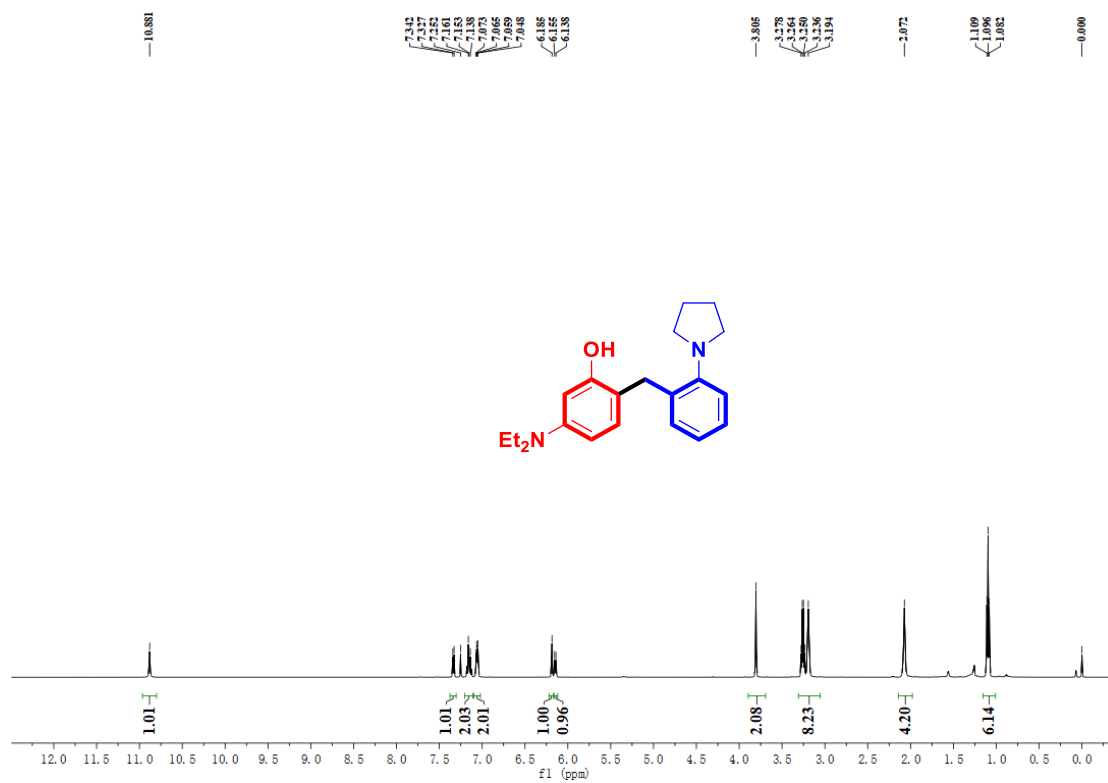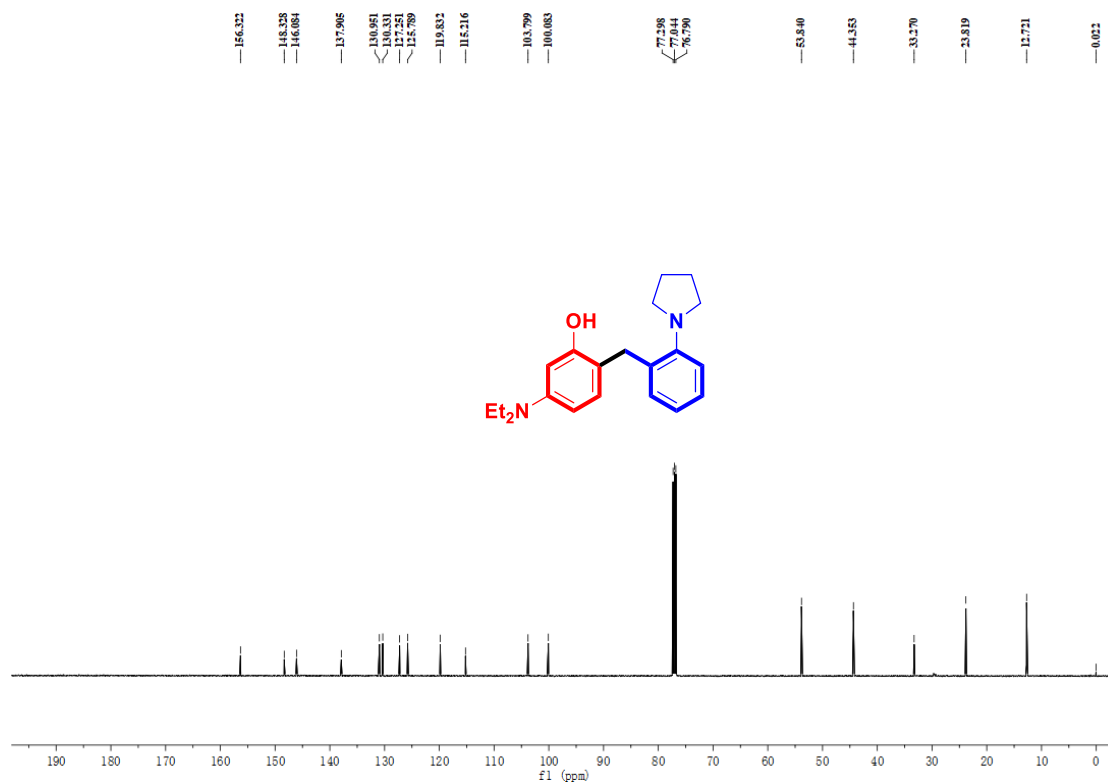

**5-(diethylamino)-2-(4-methyl-2-(pyrrolidin-1-yl)benzyl)phenol (1b)**

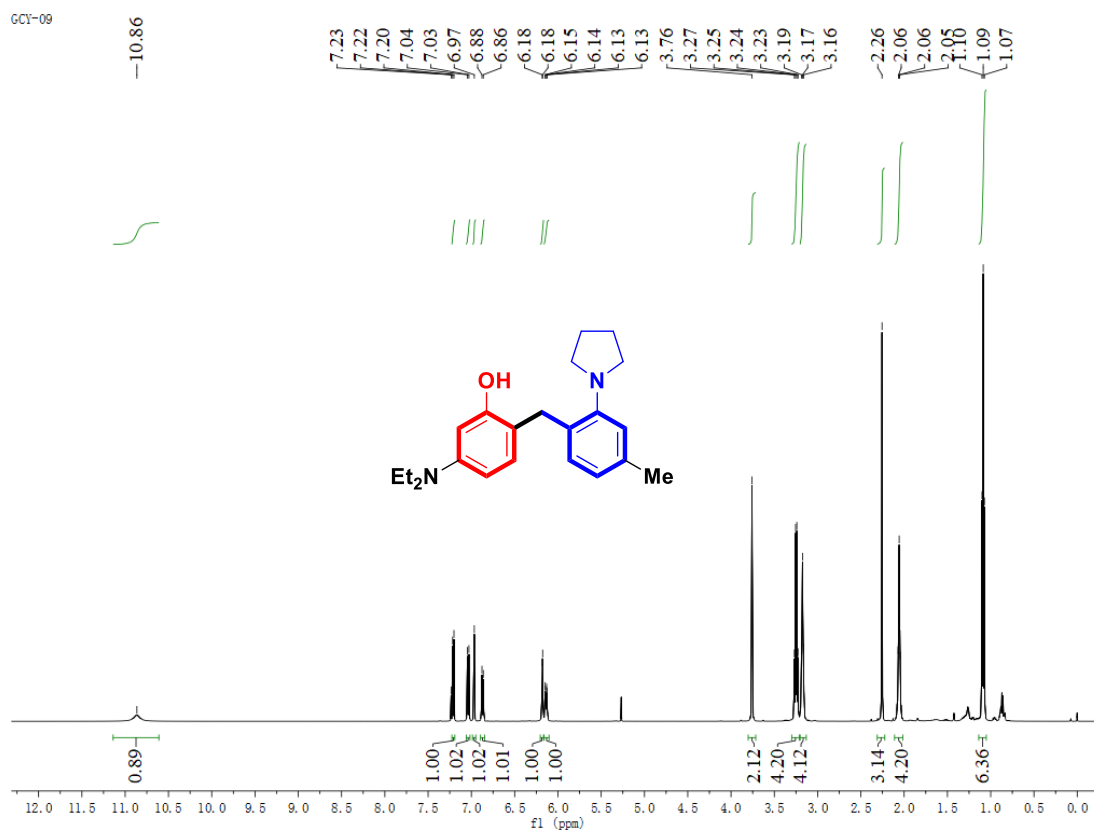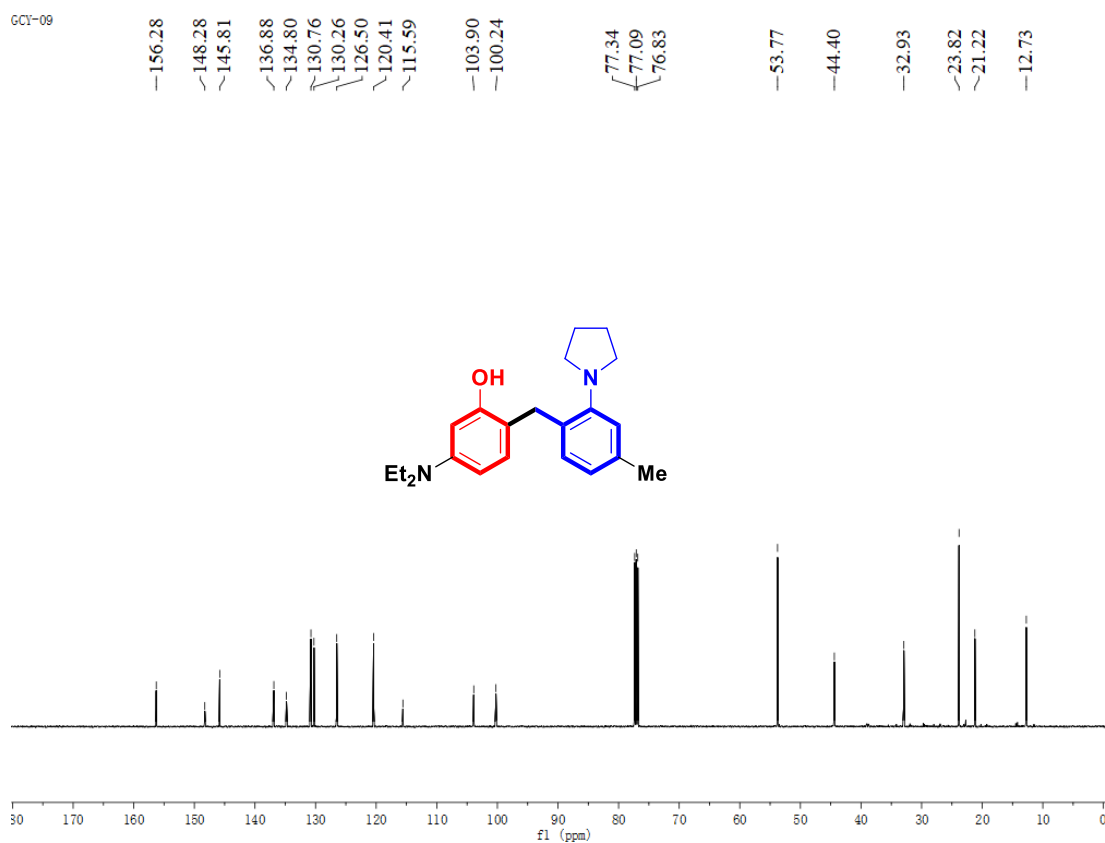

**2-(5-chloro-2-(pyrrolidin-1-yl)benzyl)-5-(diethylamino)phenol (1c)**

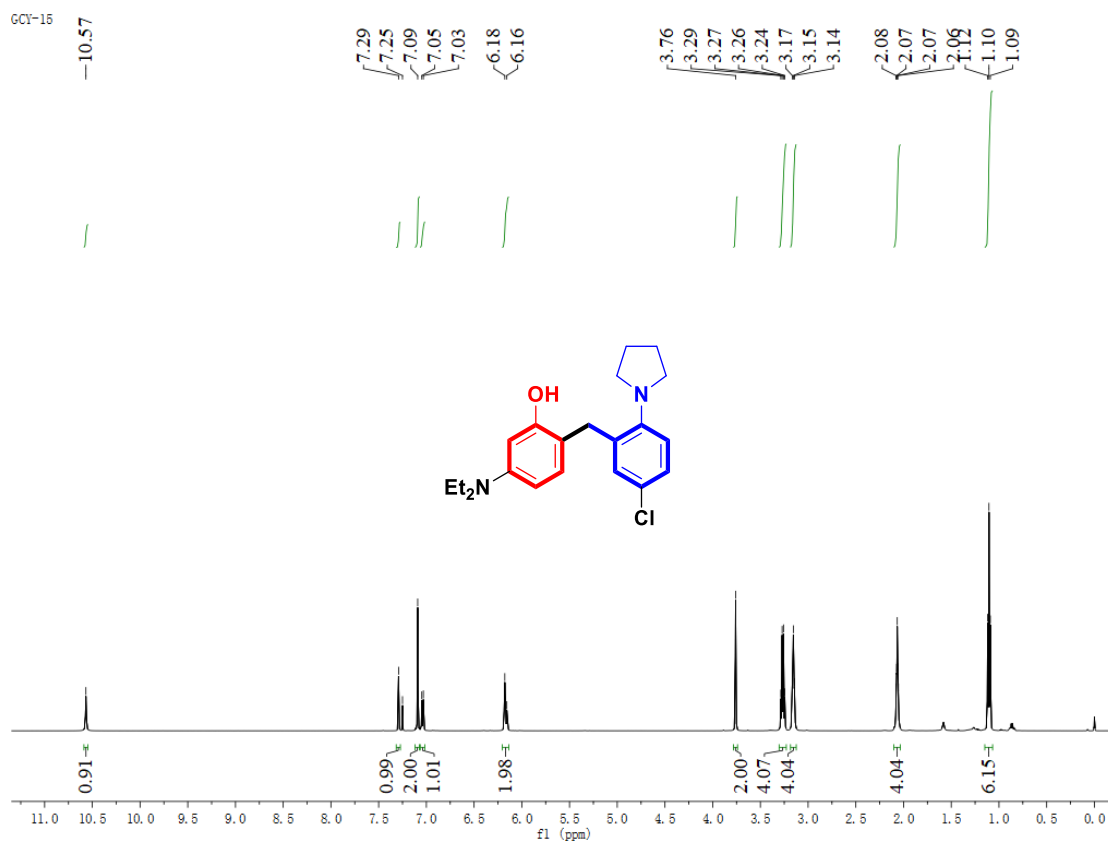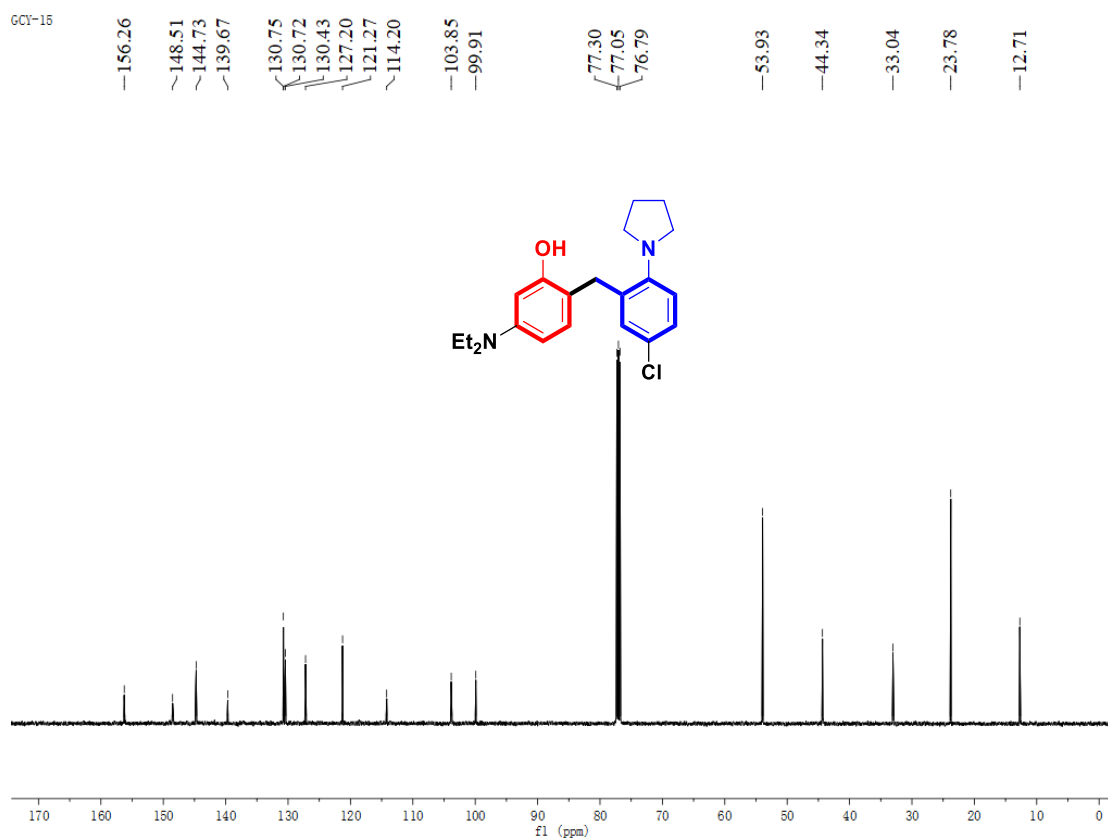

**5-(diethylamino)-2-(5-methoxy-2-(pyrrolidin-1-yl)benzyl)phenol (1d)**

GCY-18

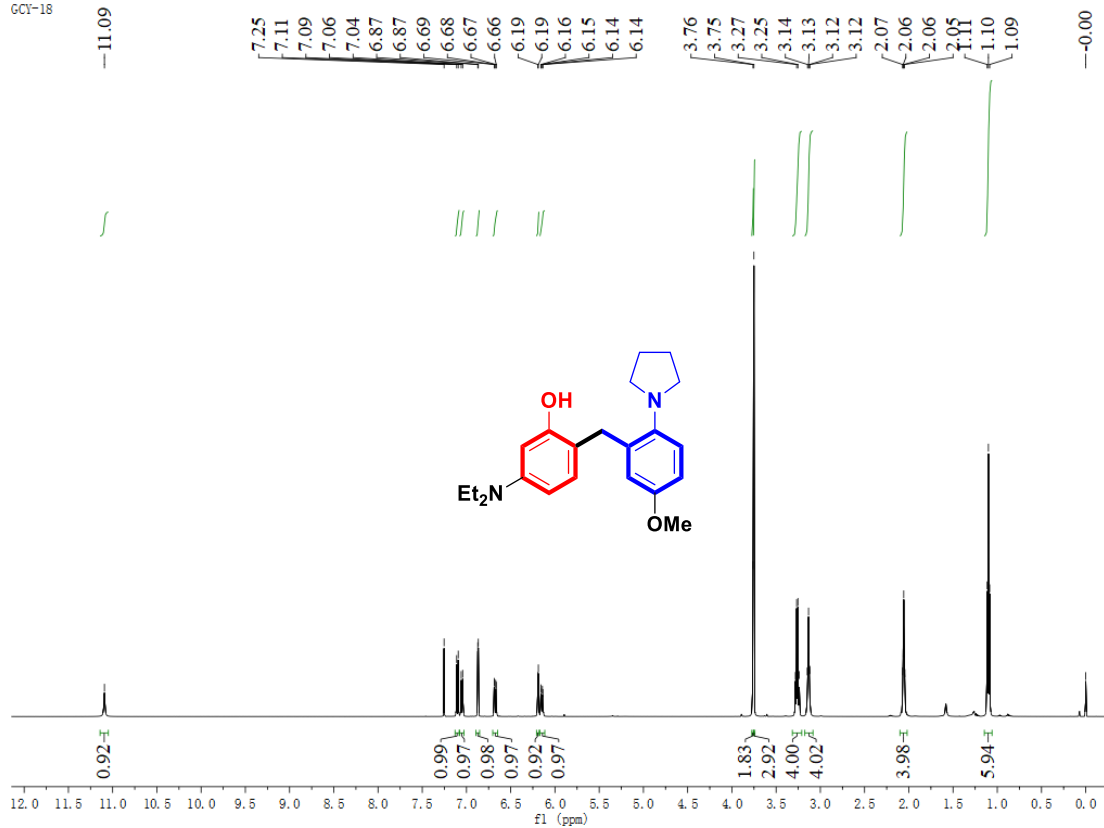

GCY-18

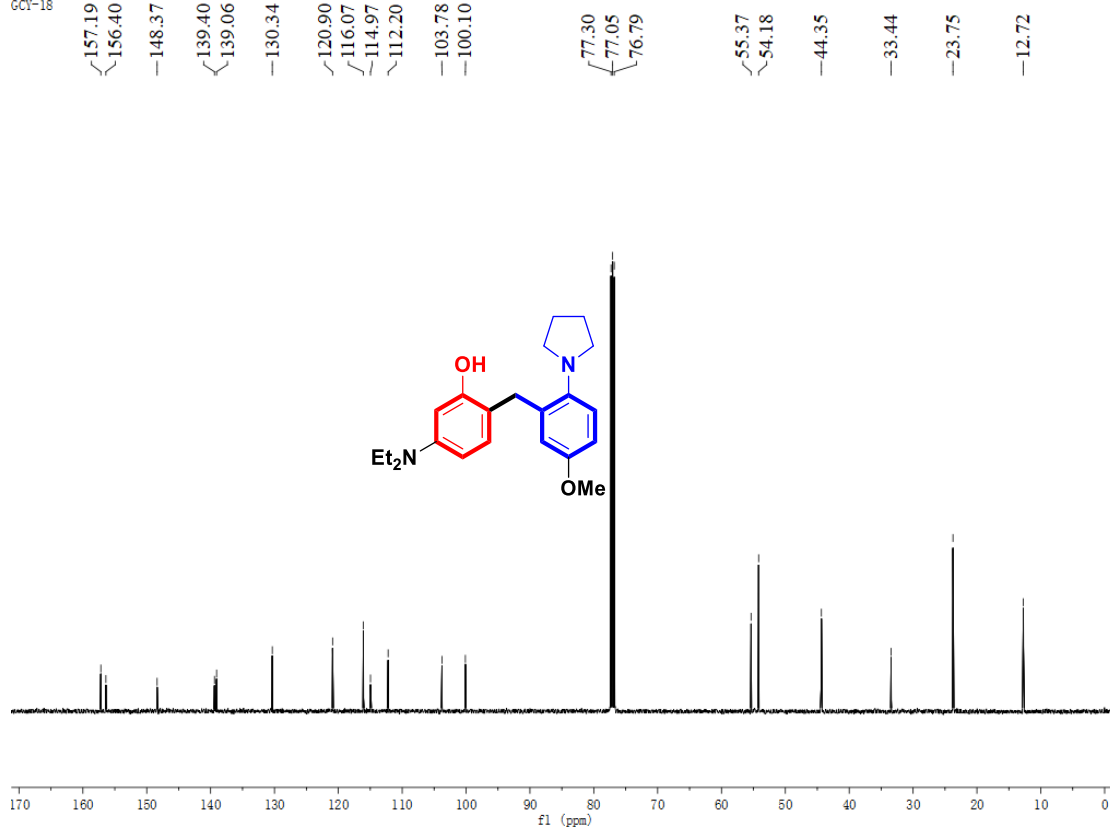

**5-(diethylamino)-2-(2-fluoro-6-(pyrrolidin-1-yl)benzyl)phenol (1e)**

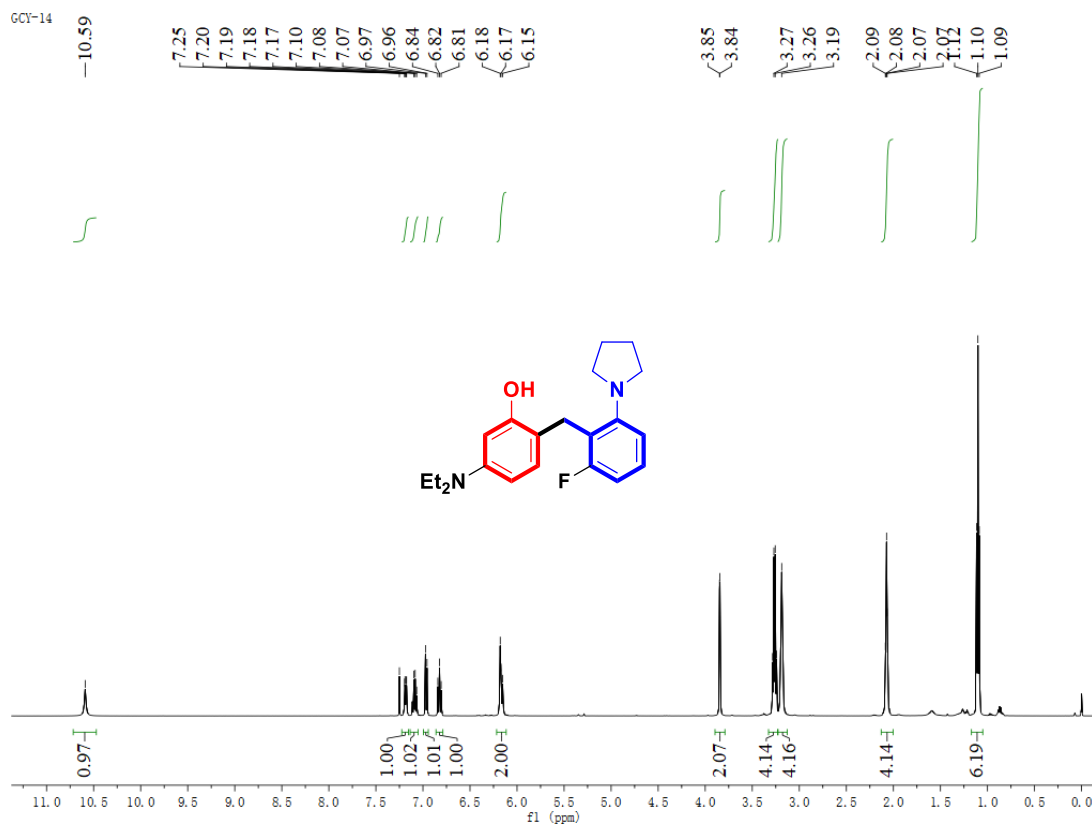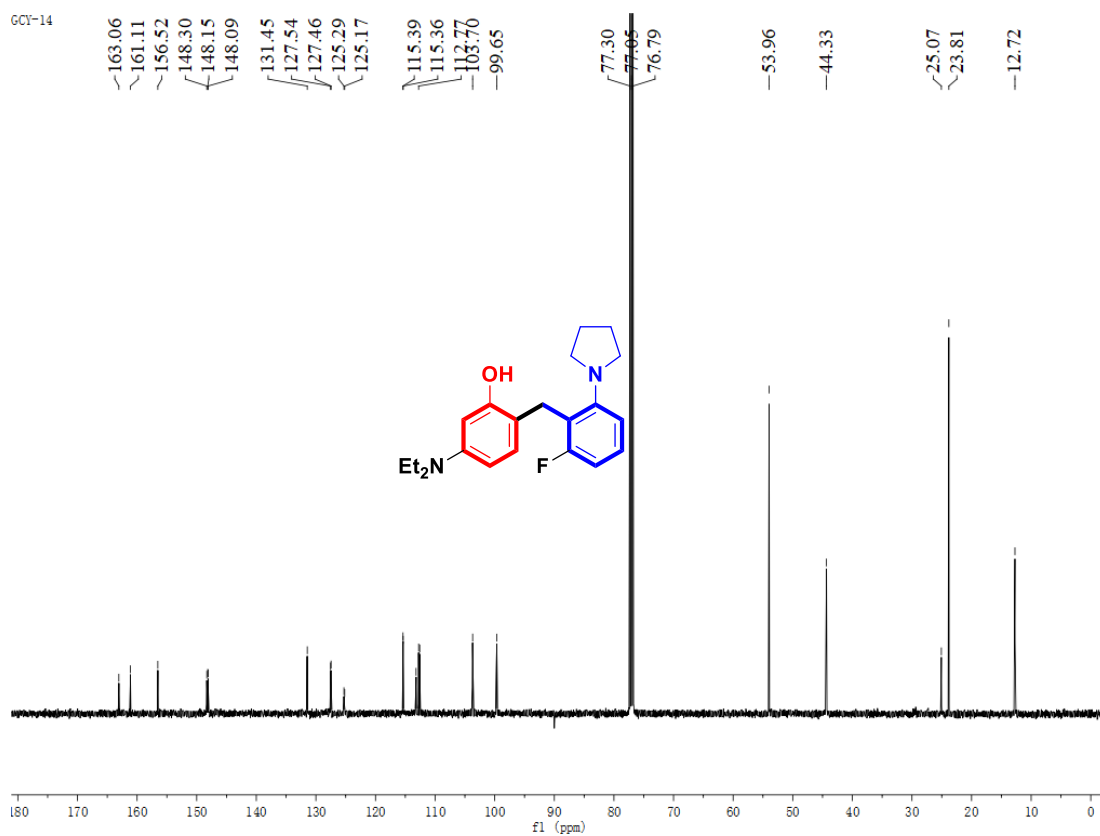

**2-(2-chloro-6-(pyrrolidin-1-yl)benzyl)-5-(diethylamino)phenol (1f)**

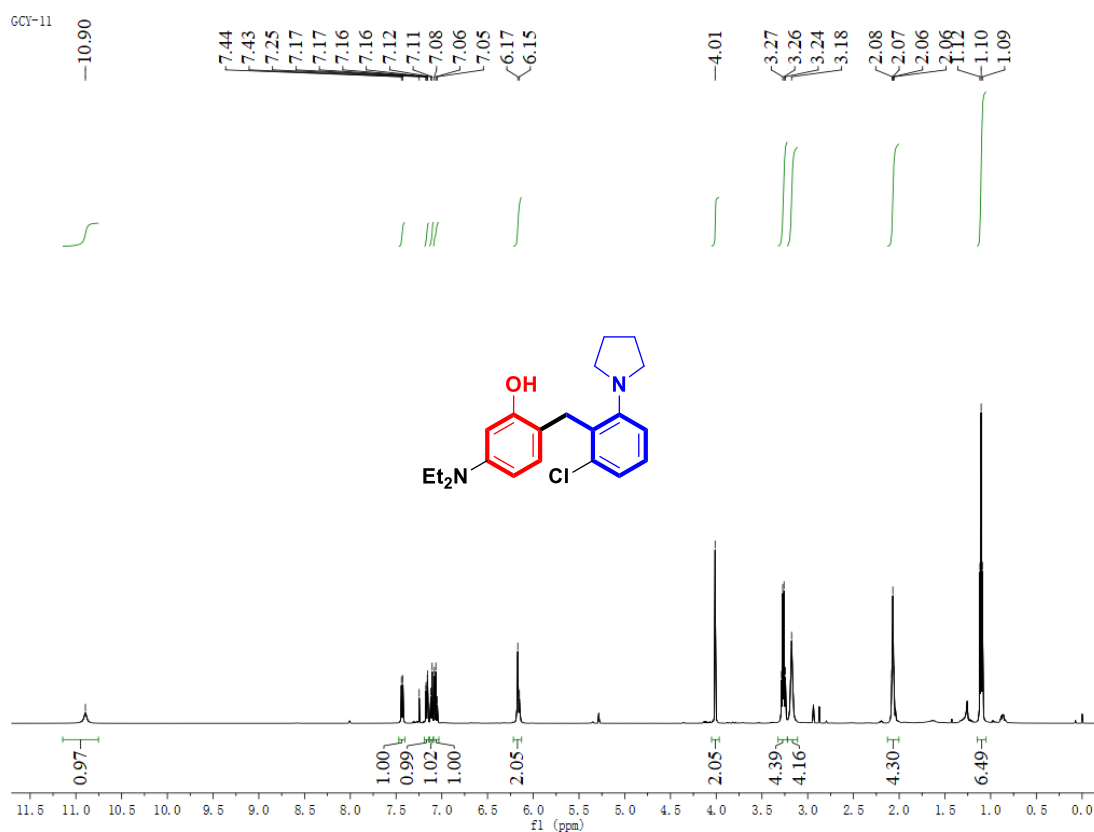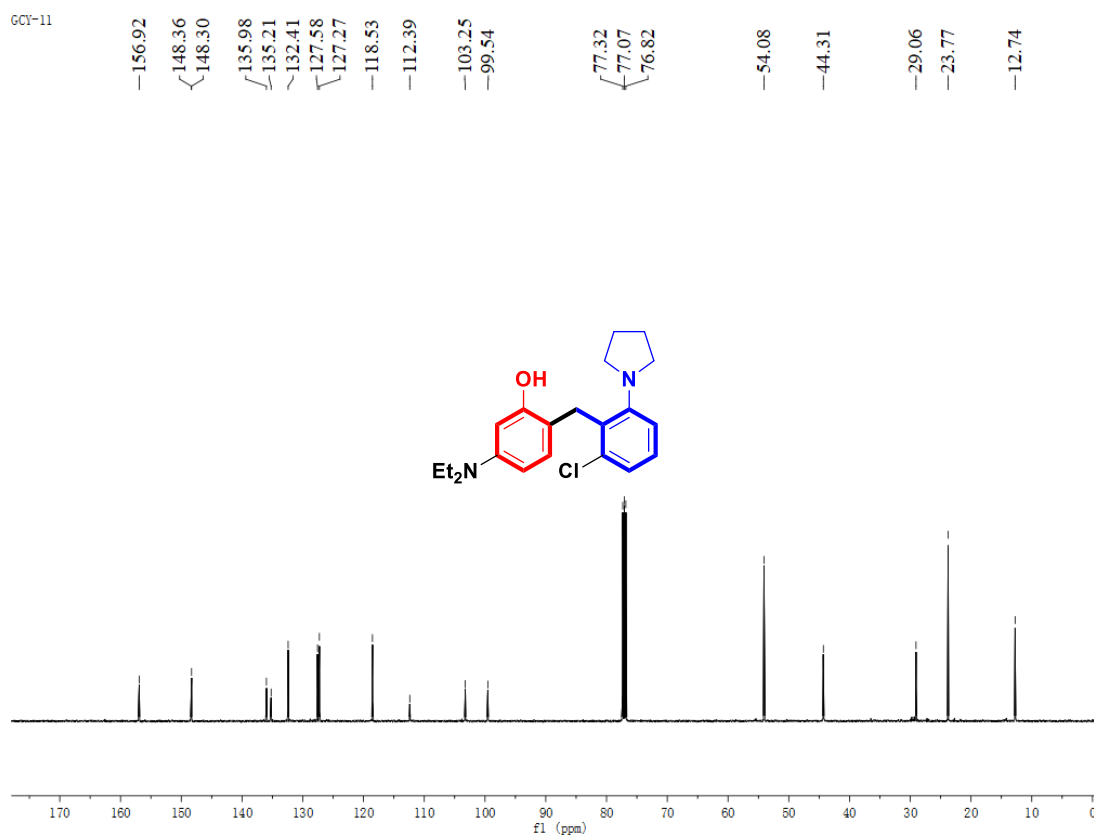

**2-(2-bromo-6-(pyrrolidin-1-yl)benzyl)-5-(diethylamino)phenol (1g)**

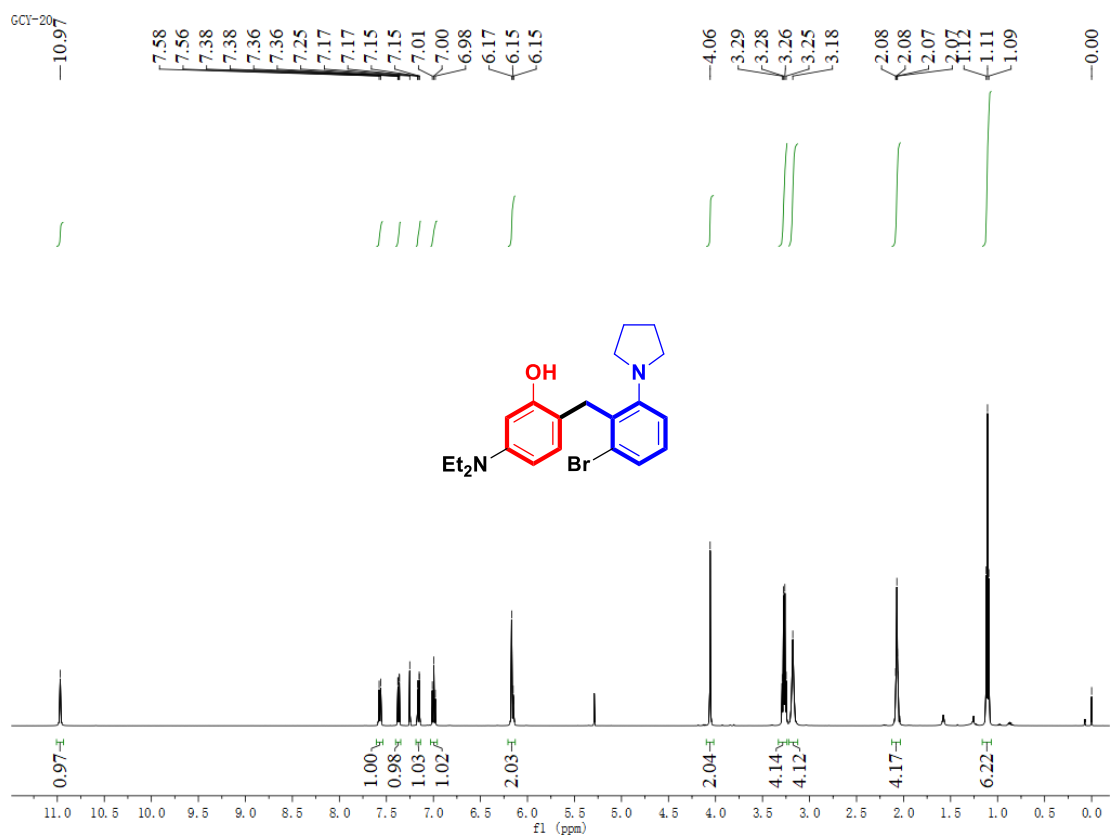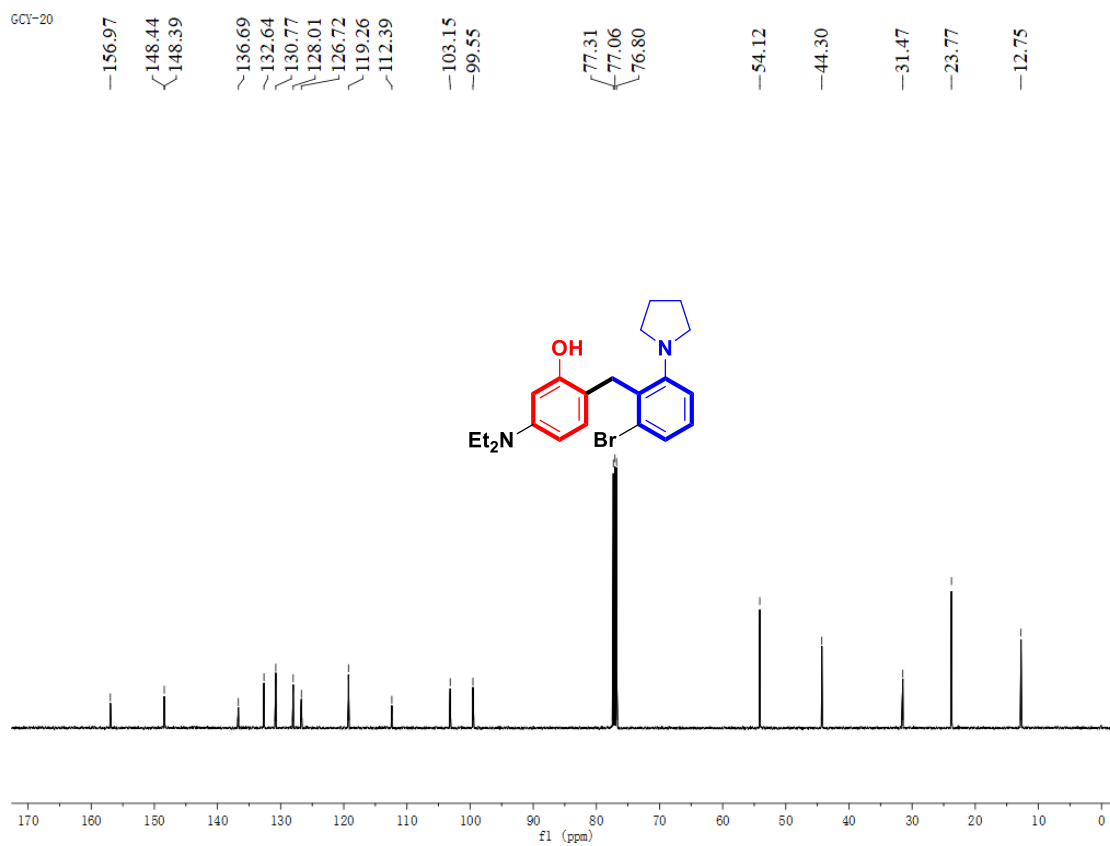



5-(diethylamino)-2-(2-((3aR,7aS)-octahydro-2H-isoindol-2-yl)benzyl)phenol (1h)

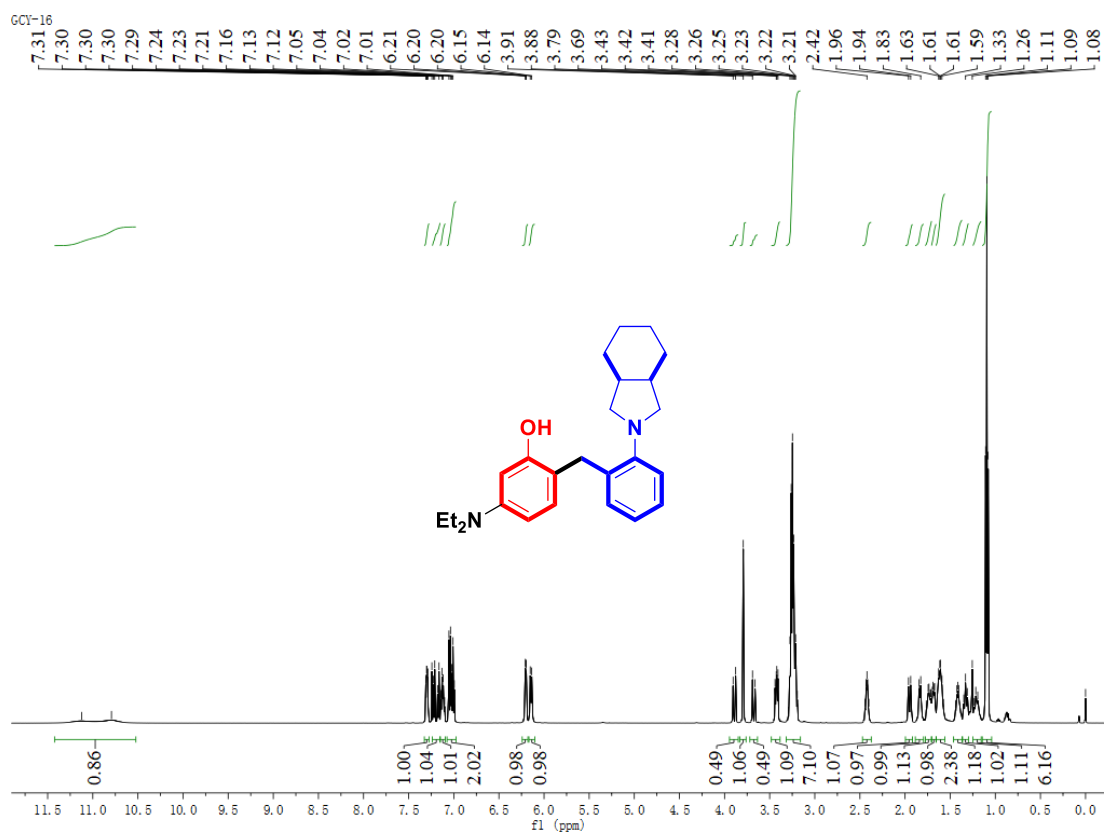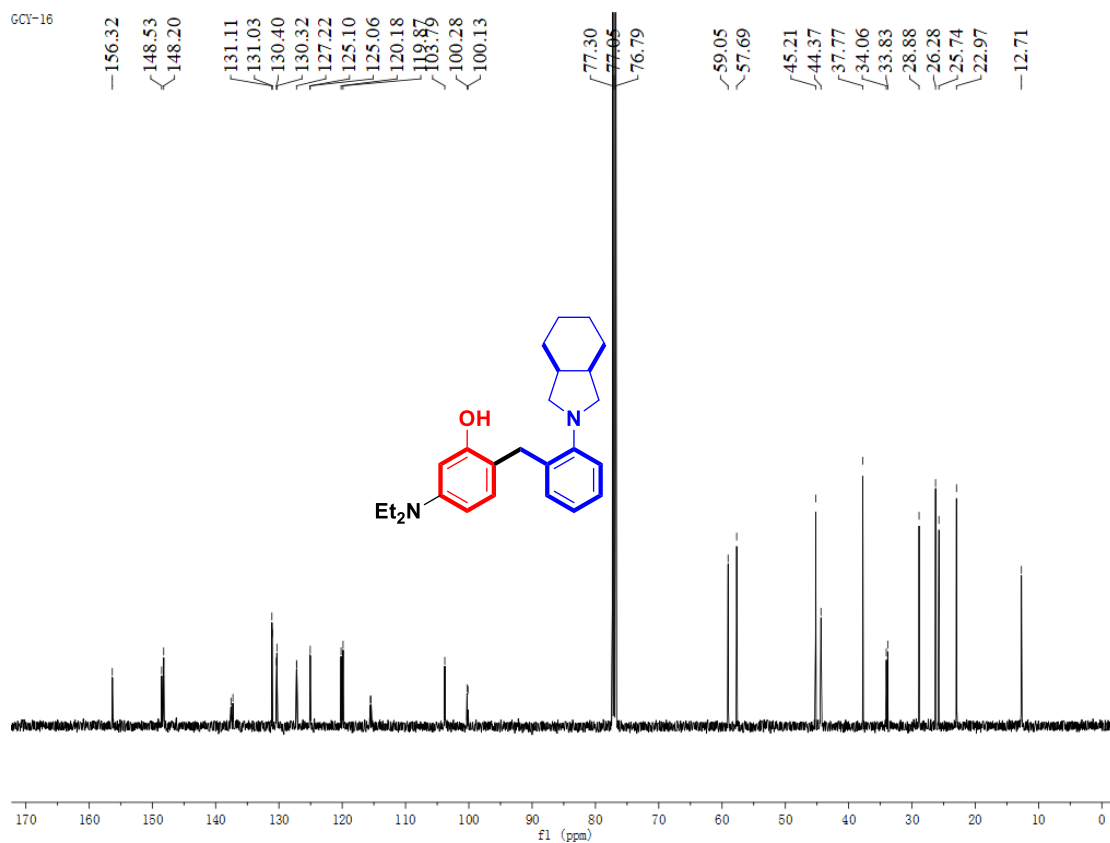

5-(pyrrolidin-1-yl)-2-(2-(pyrrolidin-1-yl)benzyl)phenol (1i)

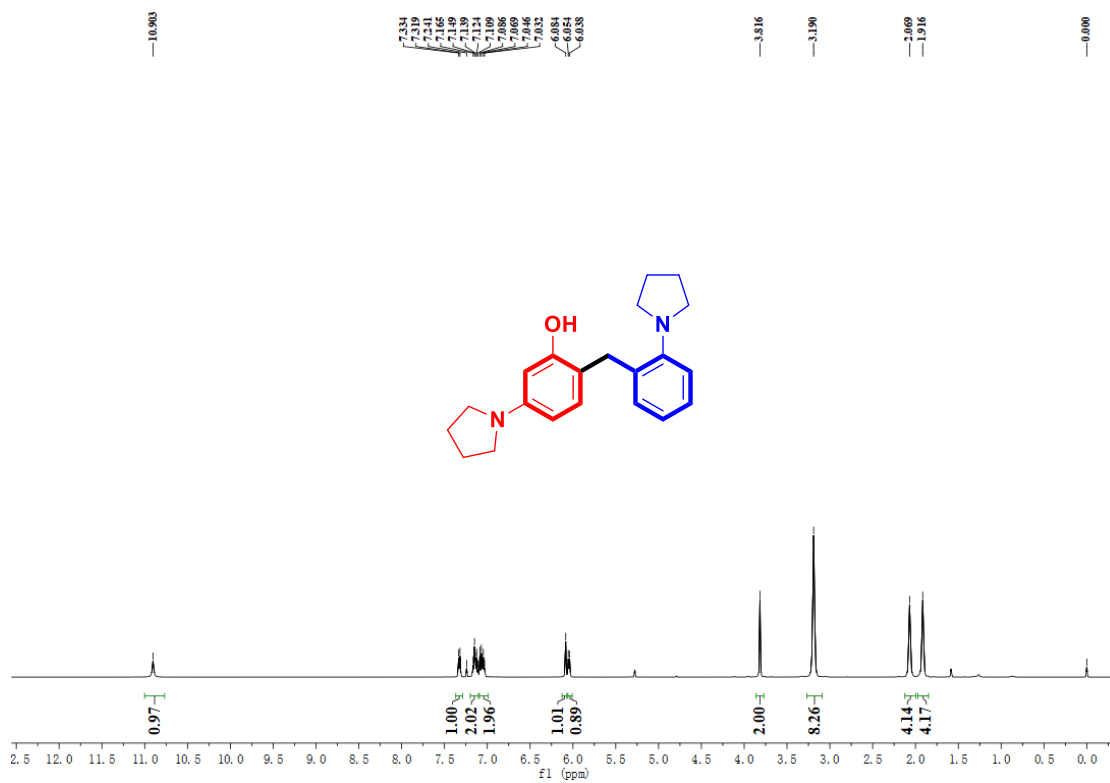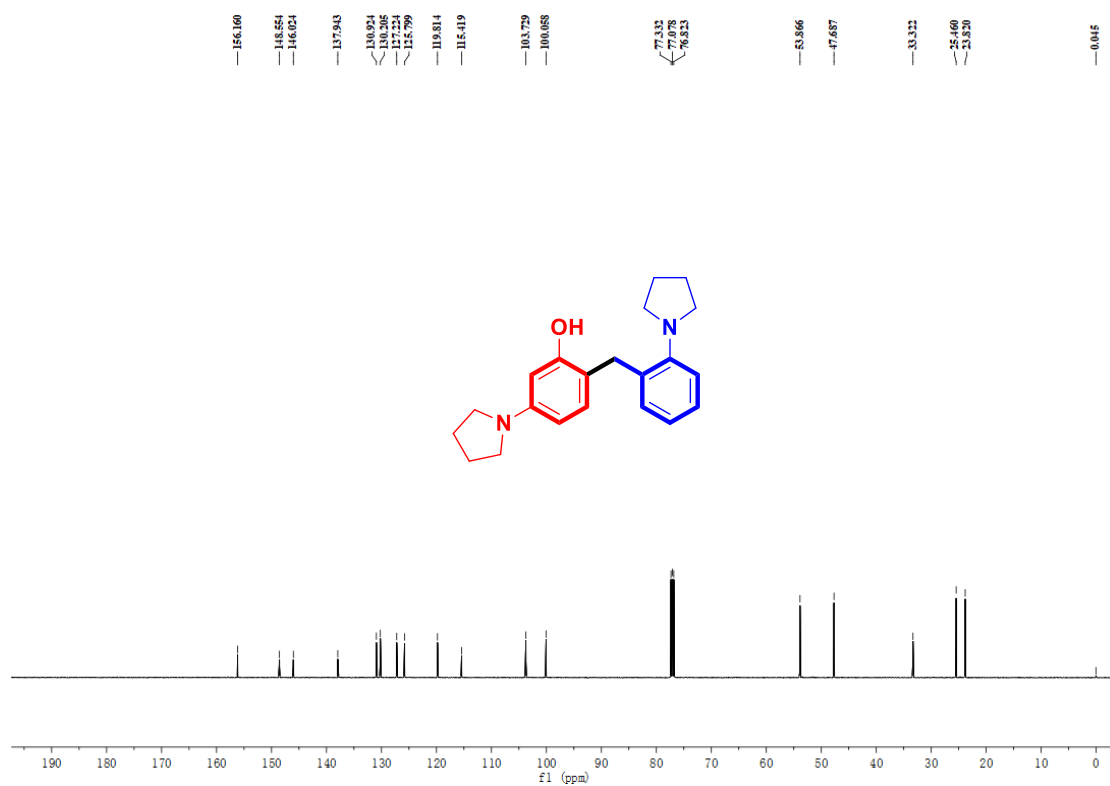

**6-(2-(pyrrolidin-1-yl)benzyl)benzo[d][1,3]dioxol-5-ol (1j)**

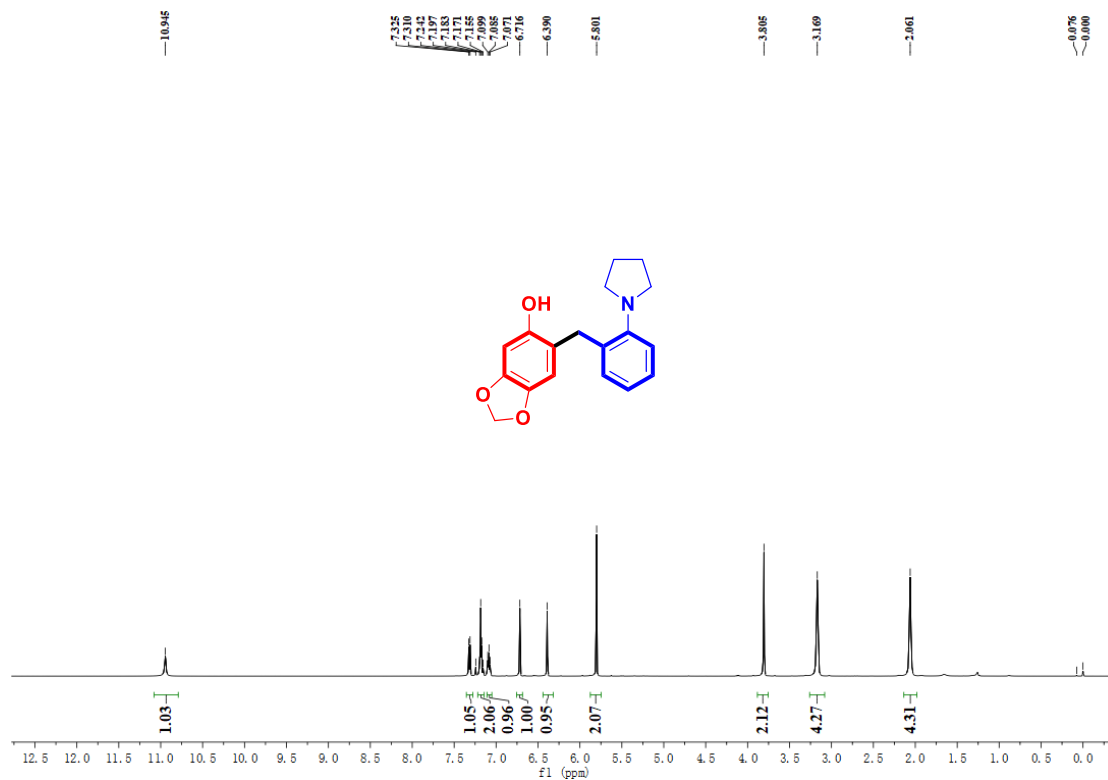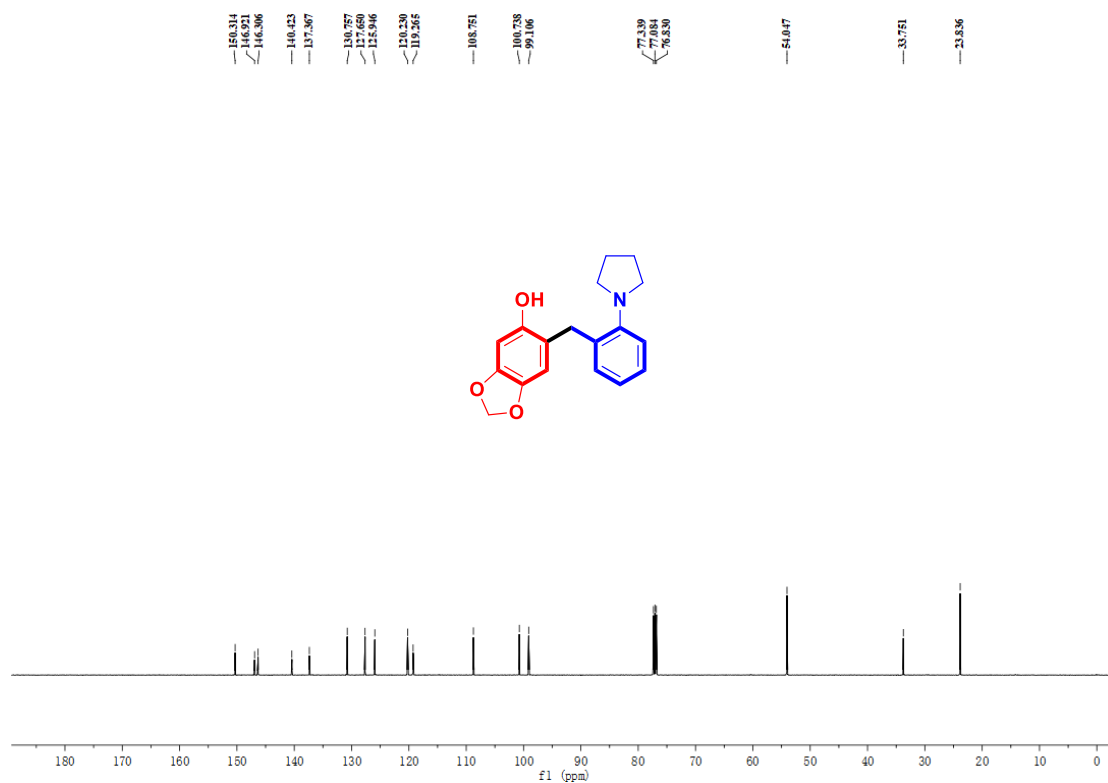

**4-(diethylamino)-1',2',3',3a'-tetrahydro-5'H-spiro[cyclohexane-1,4'-pyrrolo[1,2-a]quinoline]-2,4-dien-6-one (2a)<sup>[3]</sup>**

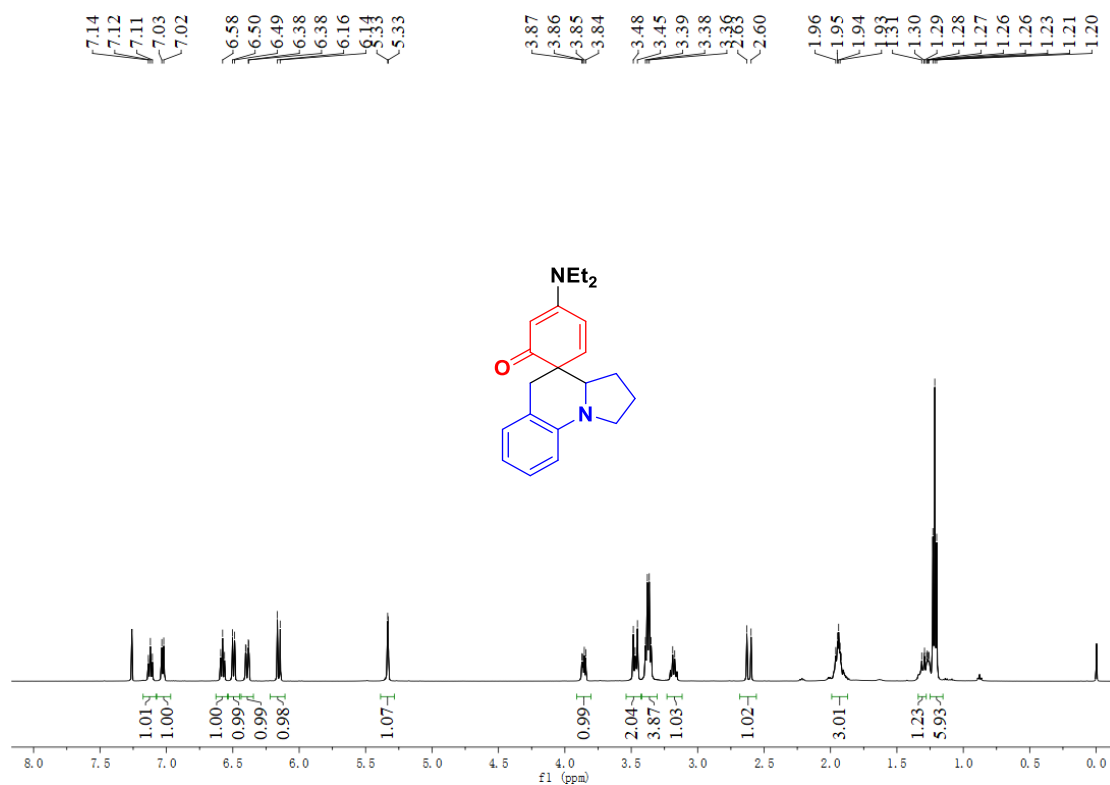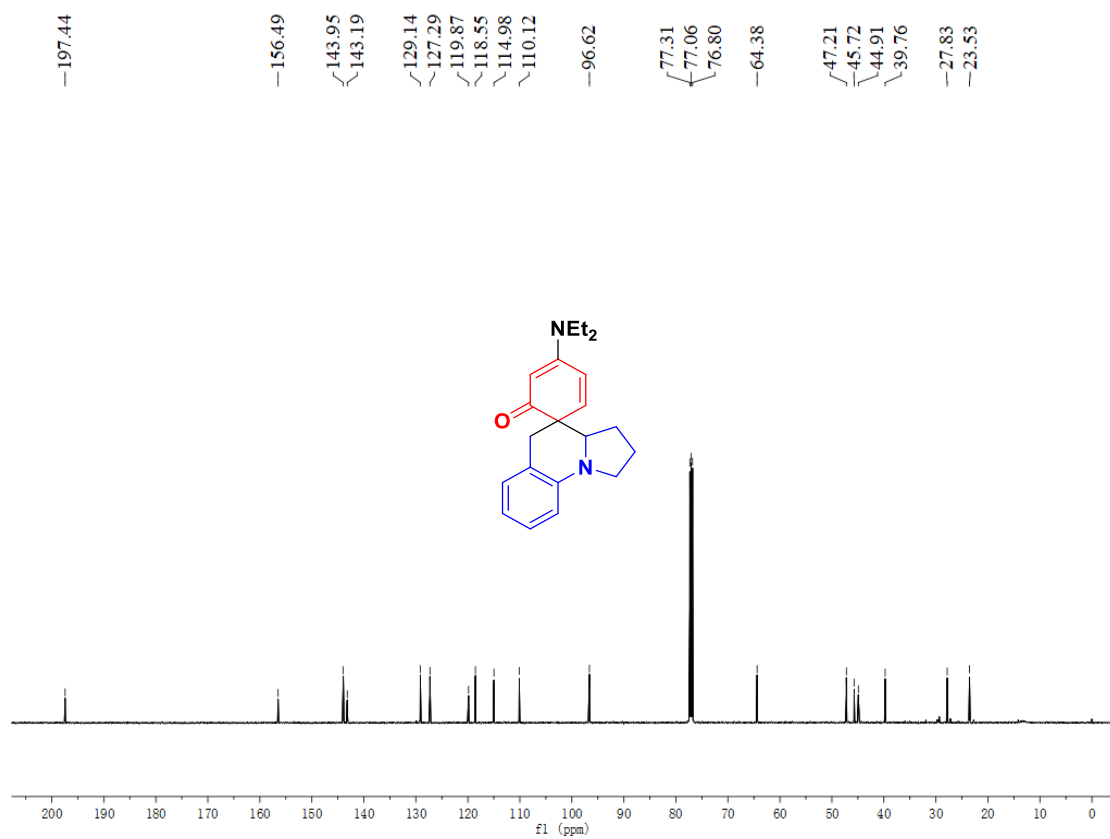

**4-(diethylamino)-8'-methyl-1',2',3',3a'-tetrahydro-5'H-spiro[cyclohexane-1,4'-pyrrolo[1,2-a]quinoline]-2,4-dien-6-one (2b)**

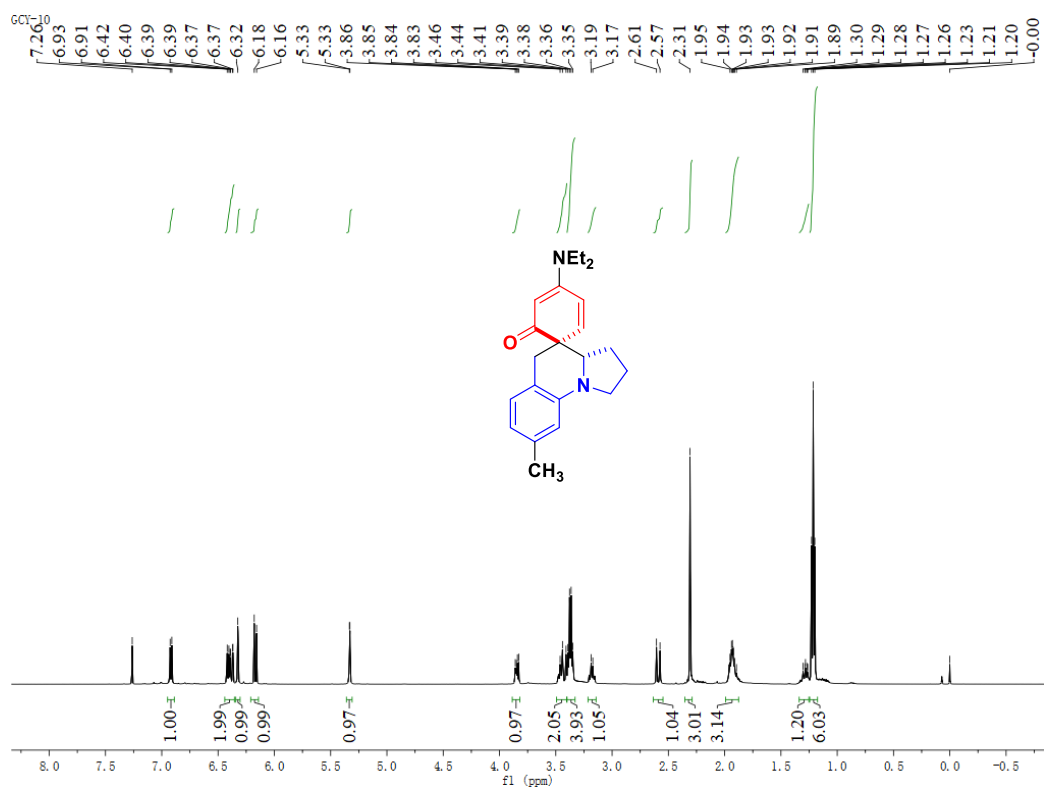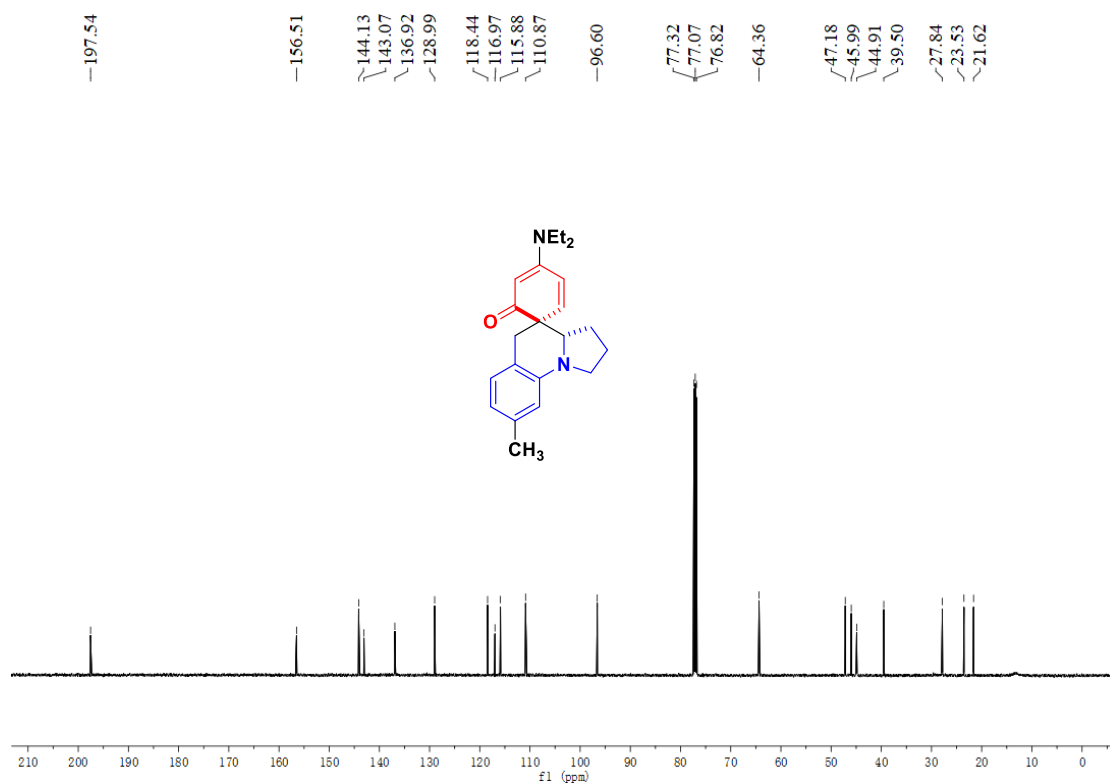

**7'-chloro-4-(diethylamino)-1',2',3',3a'-tetrahydro-5'H-spiro[cyclohexane-1,4'-pyrrolo[1,2-a]quinoline]-2,4-dien-6-one (2c)**

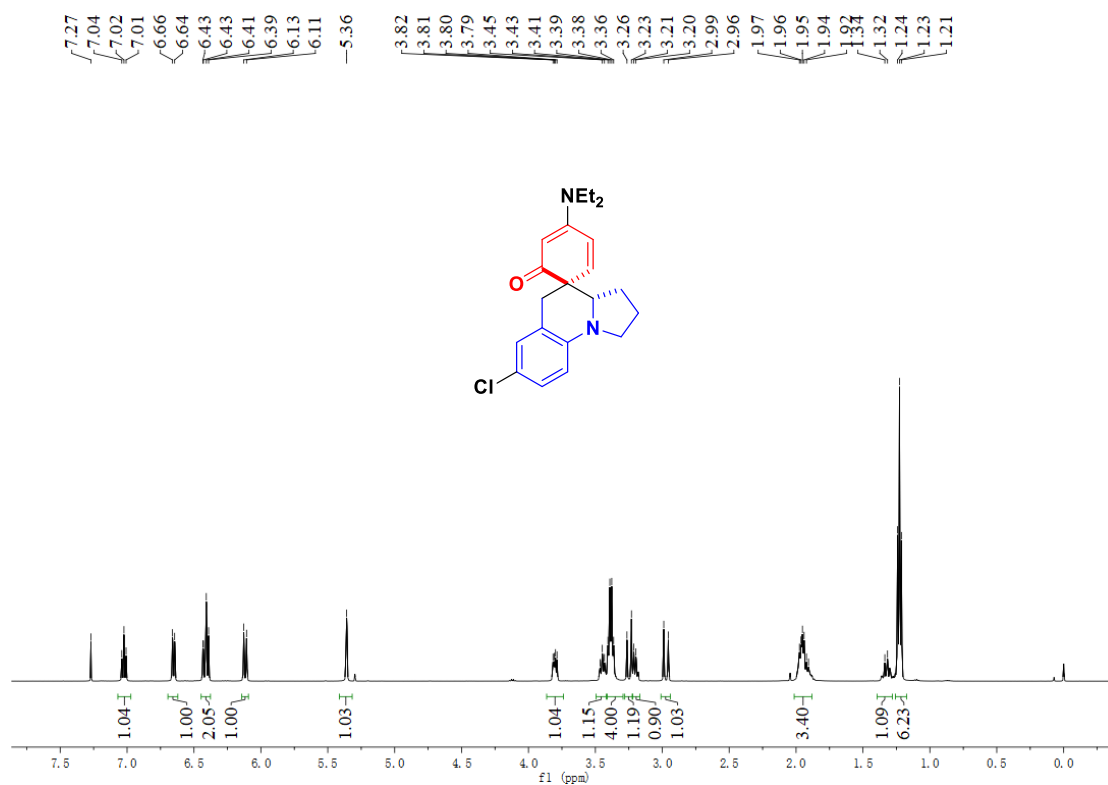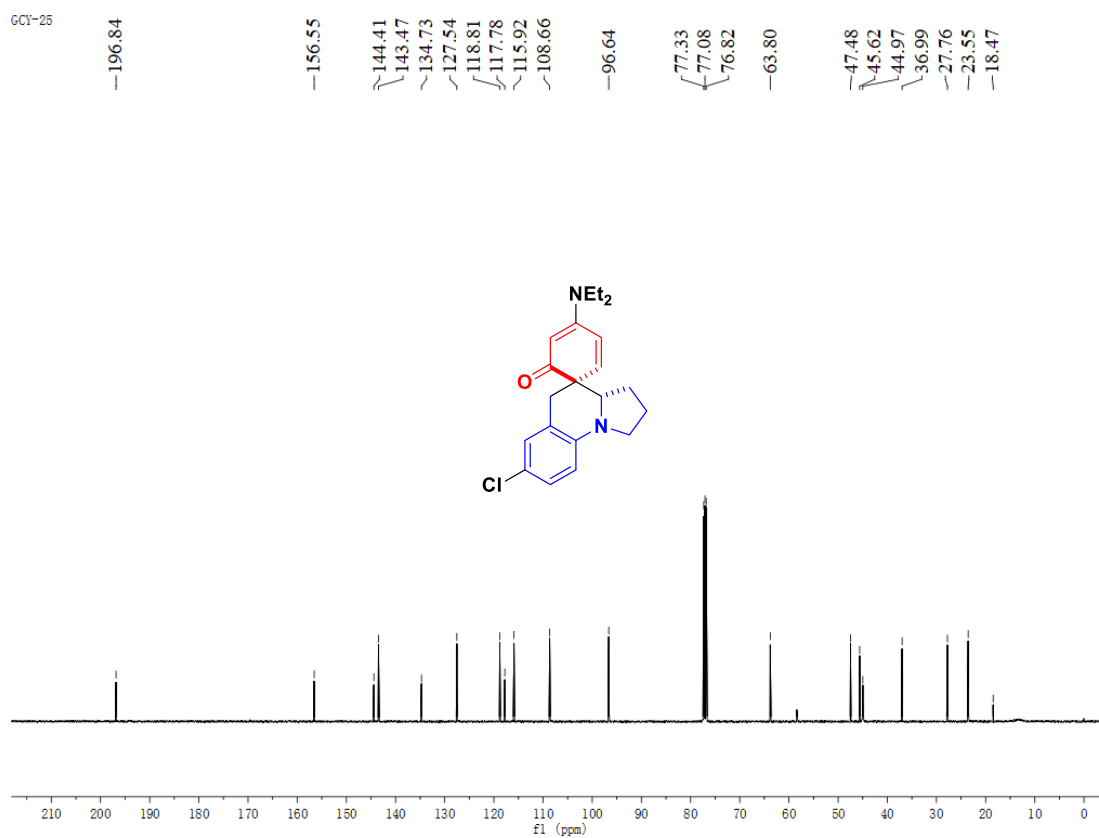

**4-(diethylamino)-7'-methoxy-1',2',3',3a'-tetrahydro-5'H-spiro[cyclohexane-1,4'-pyrrolo[1,2-a]quinoline]-2,4-dien-6-one (2d)**

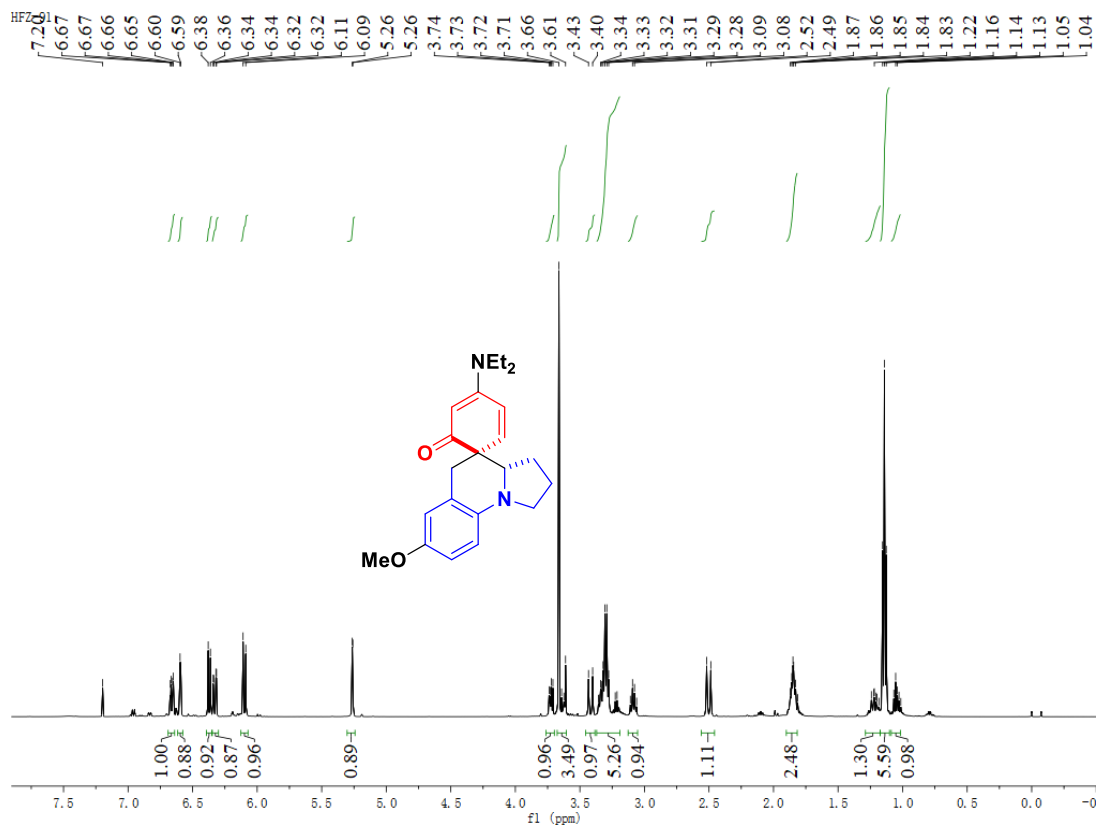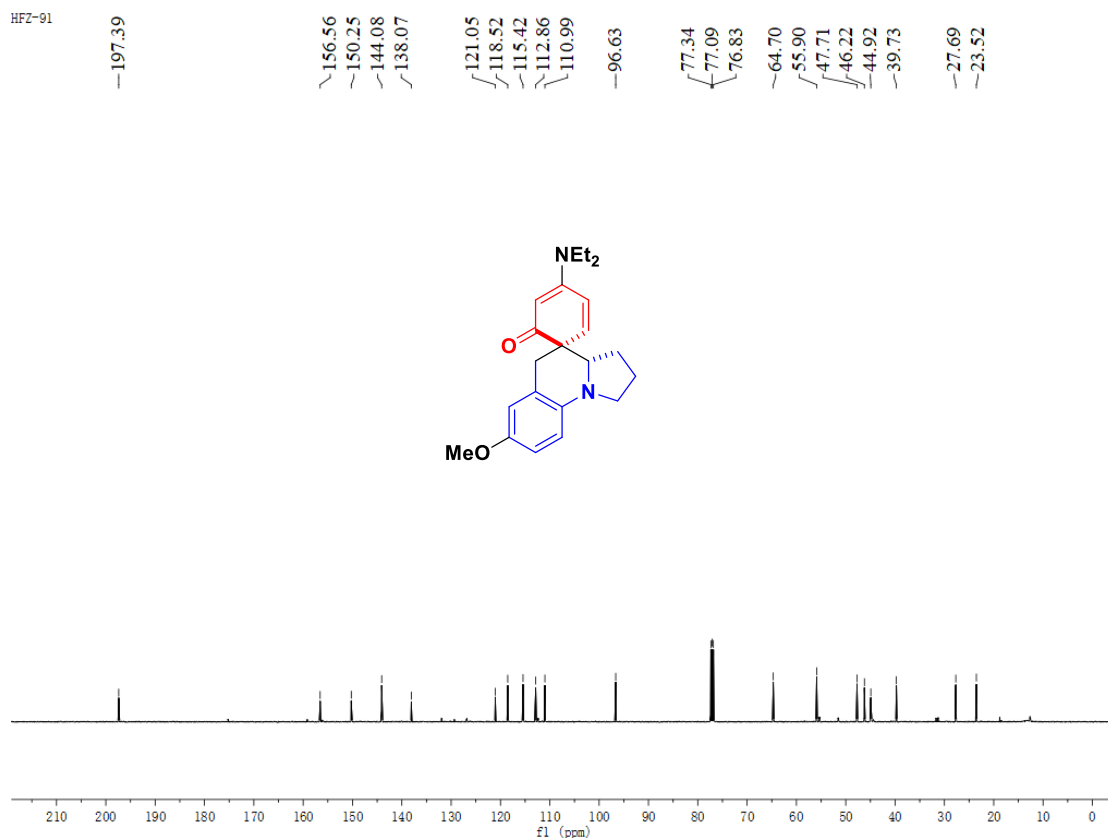

**4-(diethylamino)-6'-fluoro-1',2',3',3a'-tetrahydro-5'H-spiro[cyclohexane-1,4'-pyrrolo[1,2-a]quinoline]-2,4-dien-6-one (2e)**

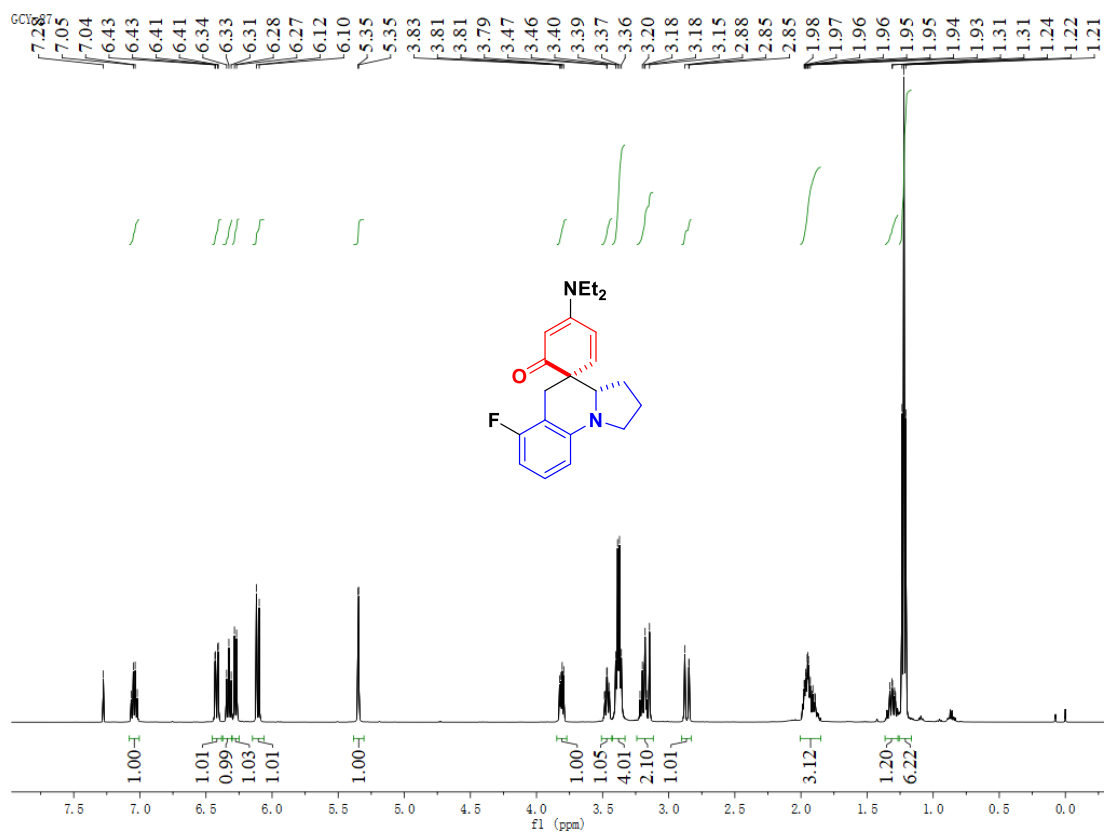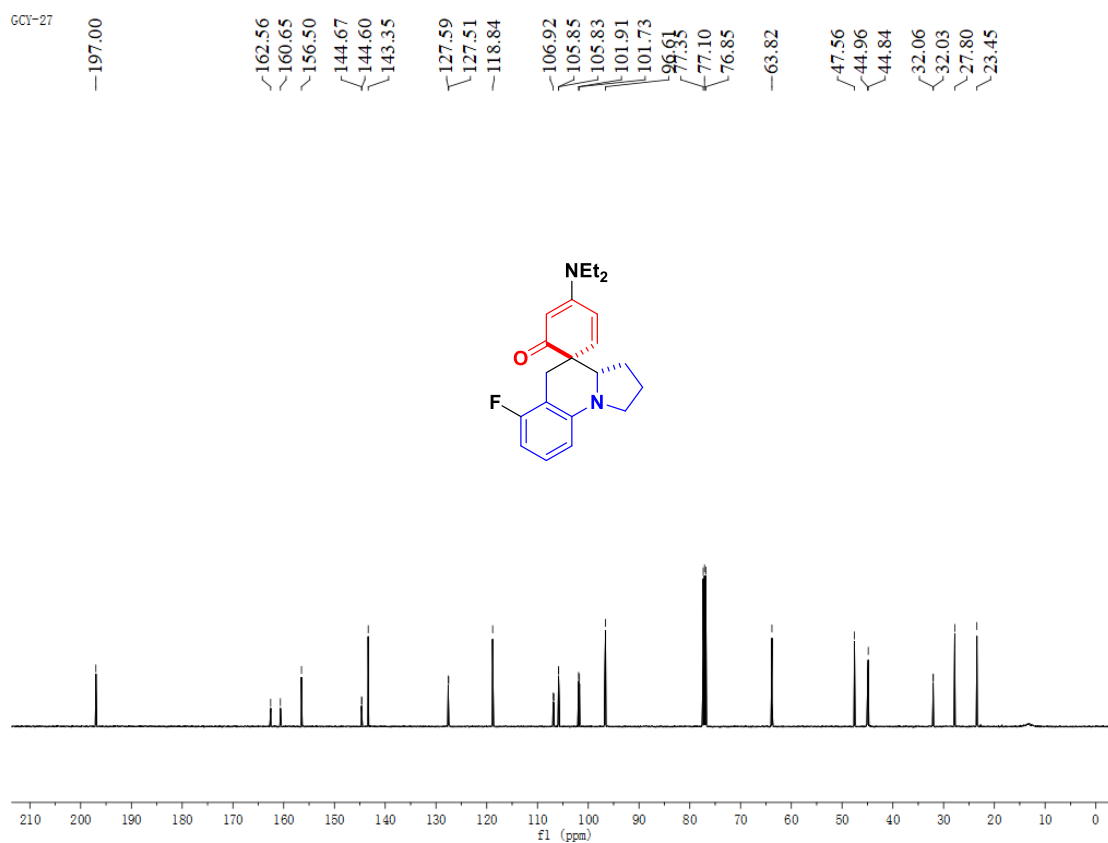



**6'-chloro-4-(diethylamino)-1',2',3',3a'-tetrahydro-5'H-spiro[cyclohexane-1,4'-pyrrolo[1,2-a]quinoline]-2,4-dien-6-one (2f)**

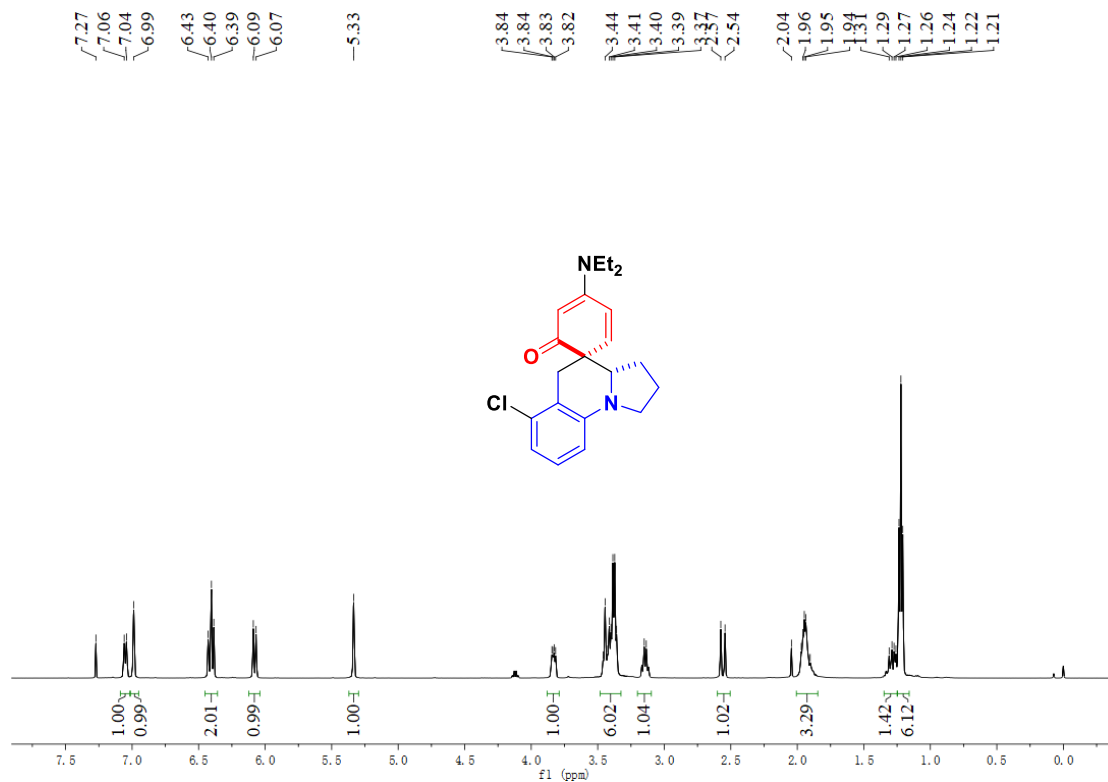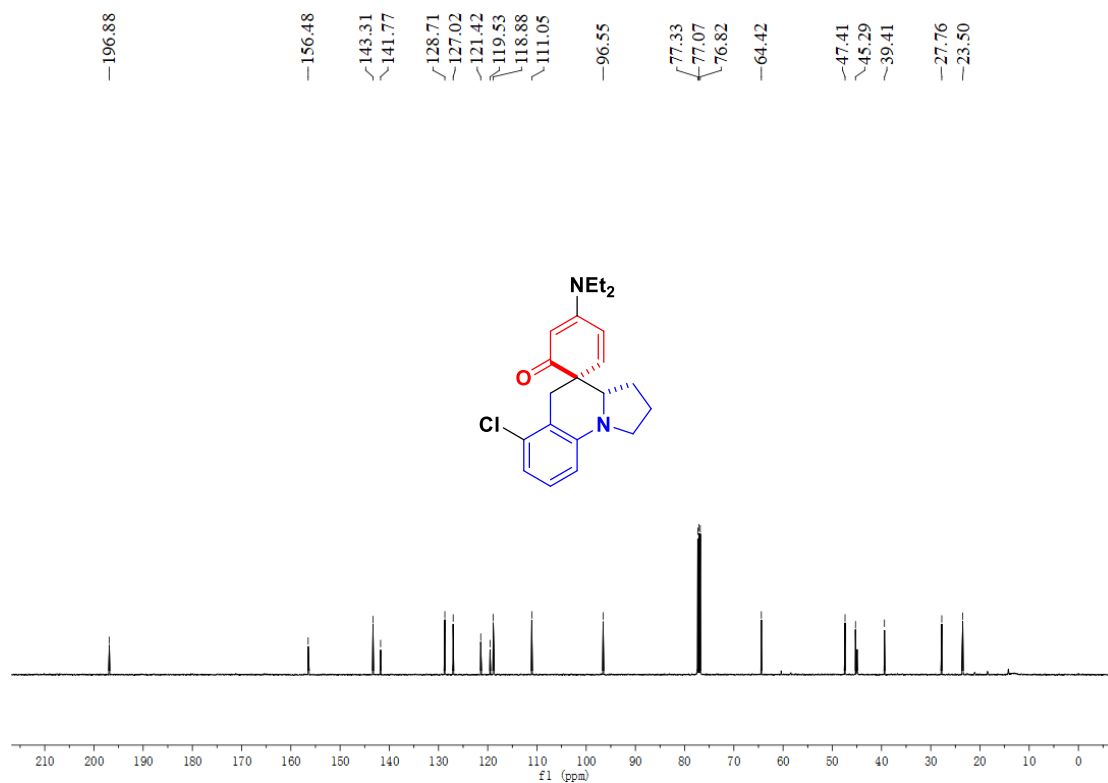

**6'-bromo-4-(diethylamino)-1',2',3',3a'-tetrahydro-5'H-spiro[cyclohexane-1,4'-pyrrolo[1,2-a]quinoline]-2,4-dien-6-one (2g)**

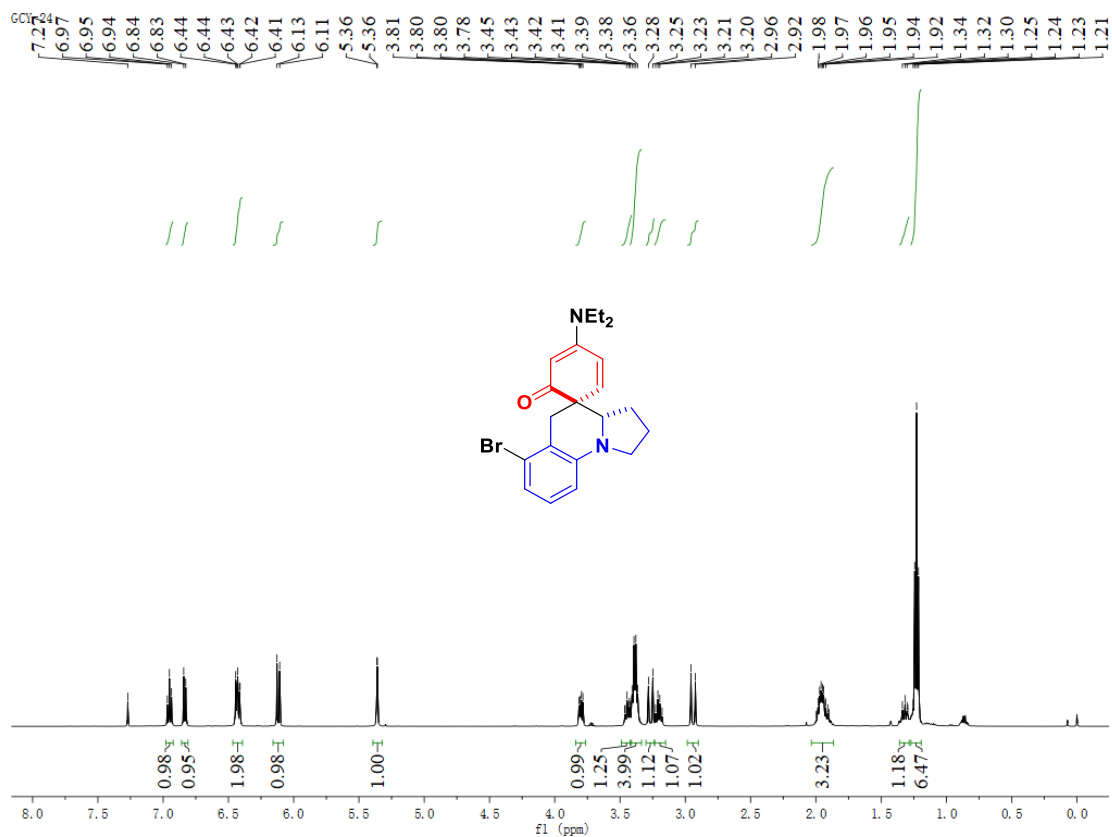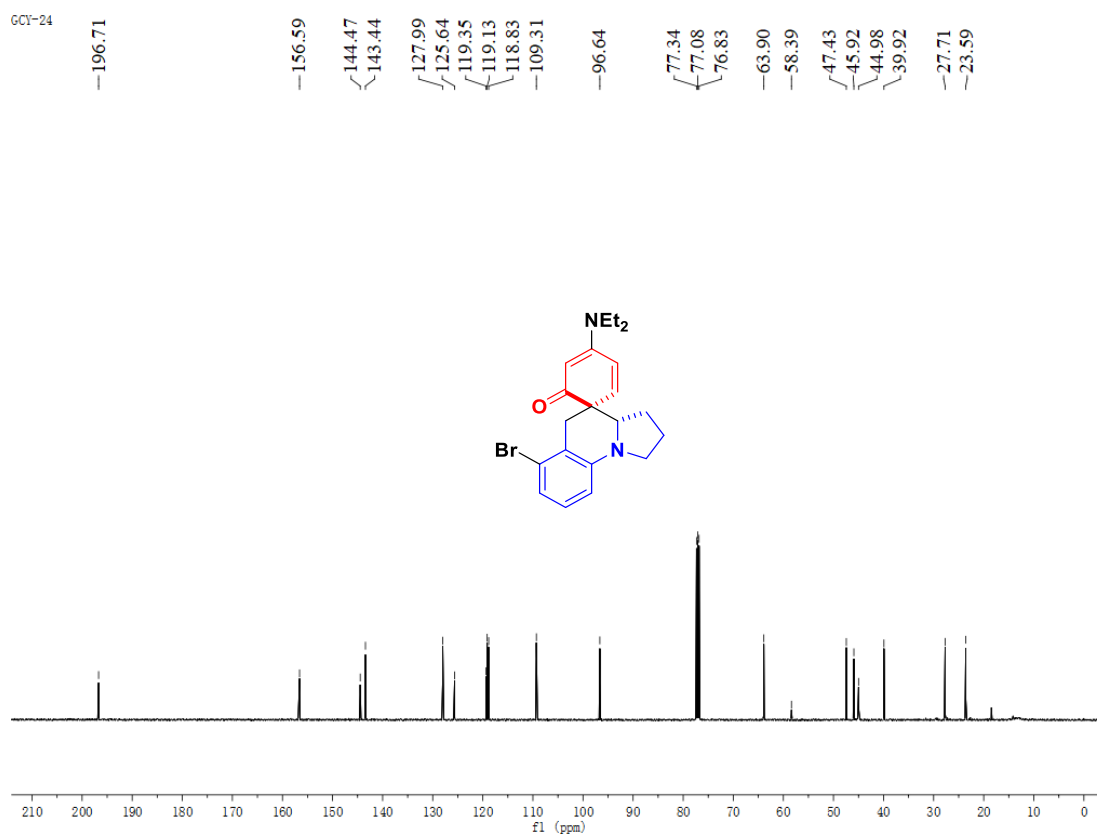

**4-(diethylamino)-6a',6b',7',8',9',10',10a',11'-octahydro-5'H-spiro[cyclohexane-1,6'-isoindolo[2,1-a]quinoline]-2,4-dien-6-one (2h)**

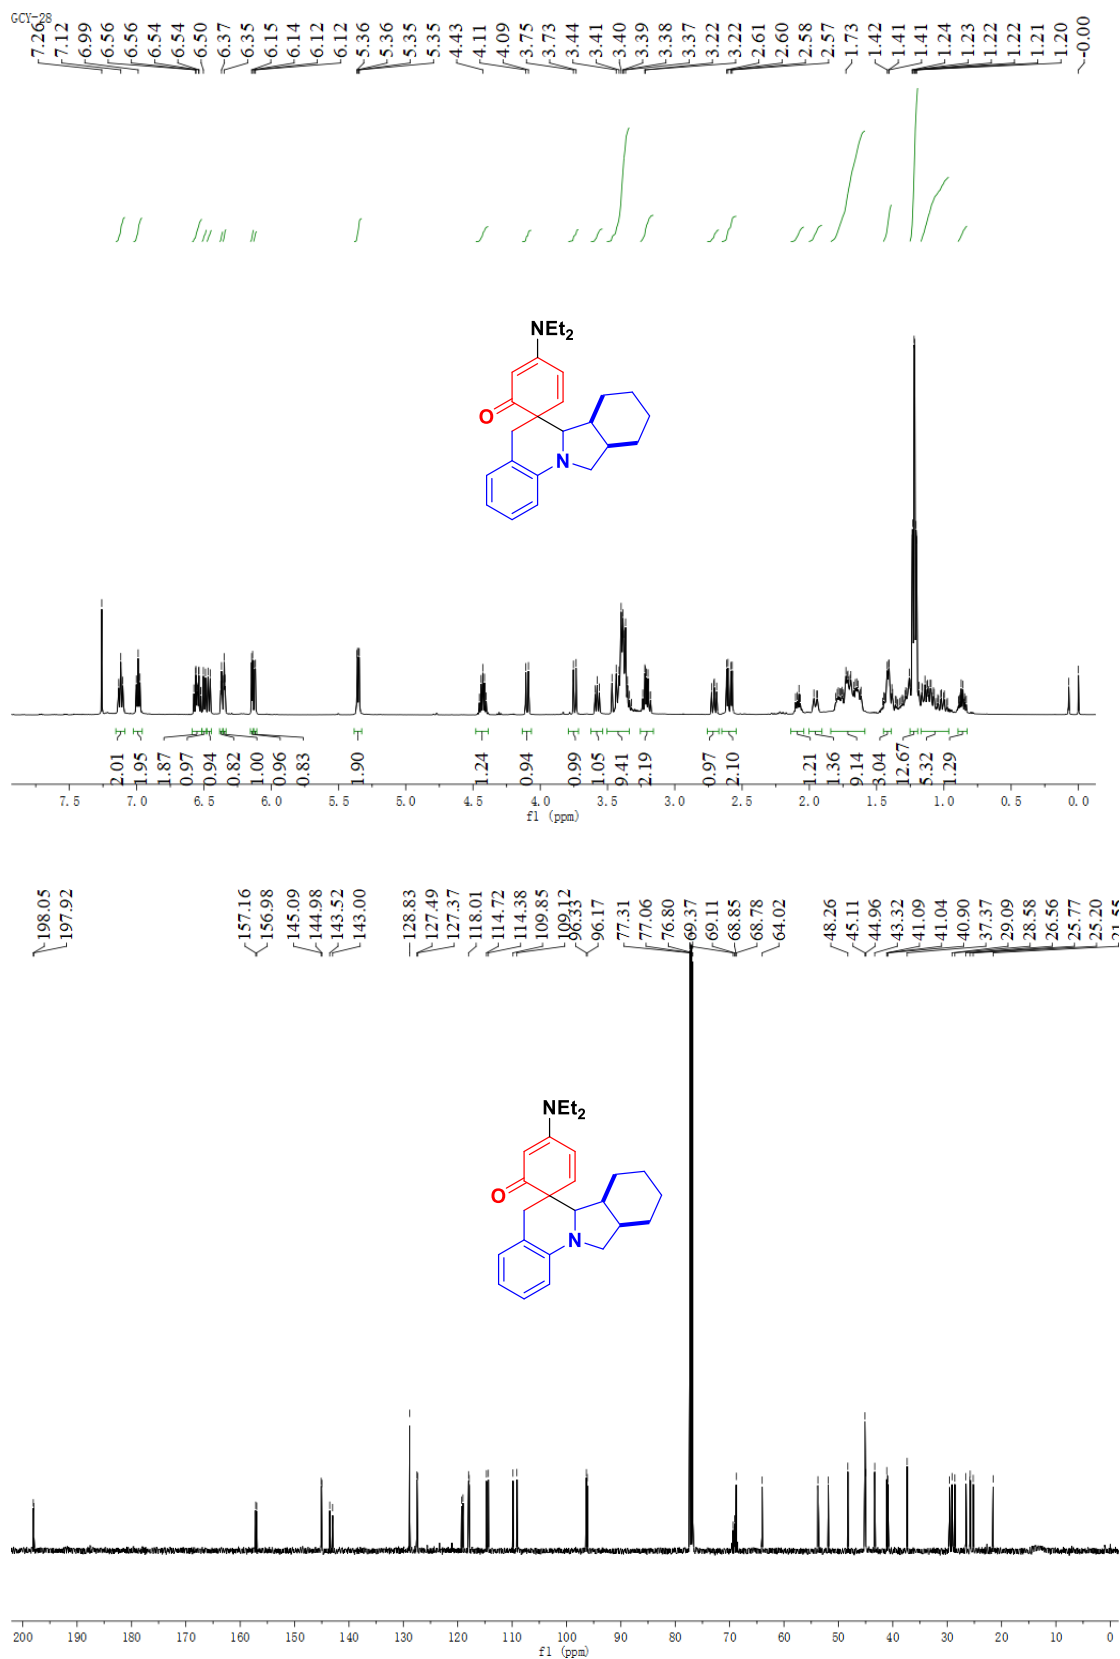

**4-(pyrrolidin-1-yl)-1',2',3',3a'-tetrahydro-5'H-spiro[cyclohexane-1,4'-pyrrolo[1,2-a]quinoline]-2,4-dien-6-one (2i)<sup>[3]</sup>**

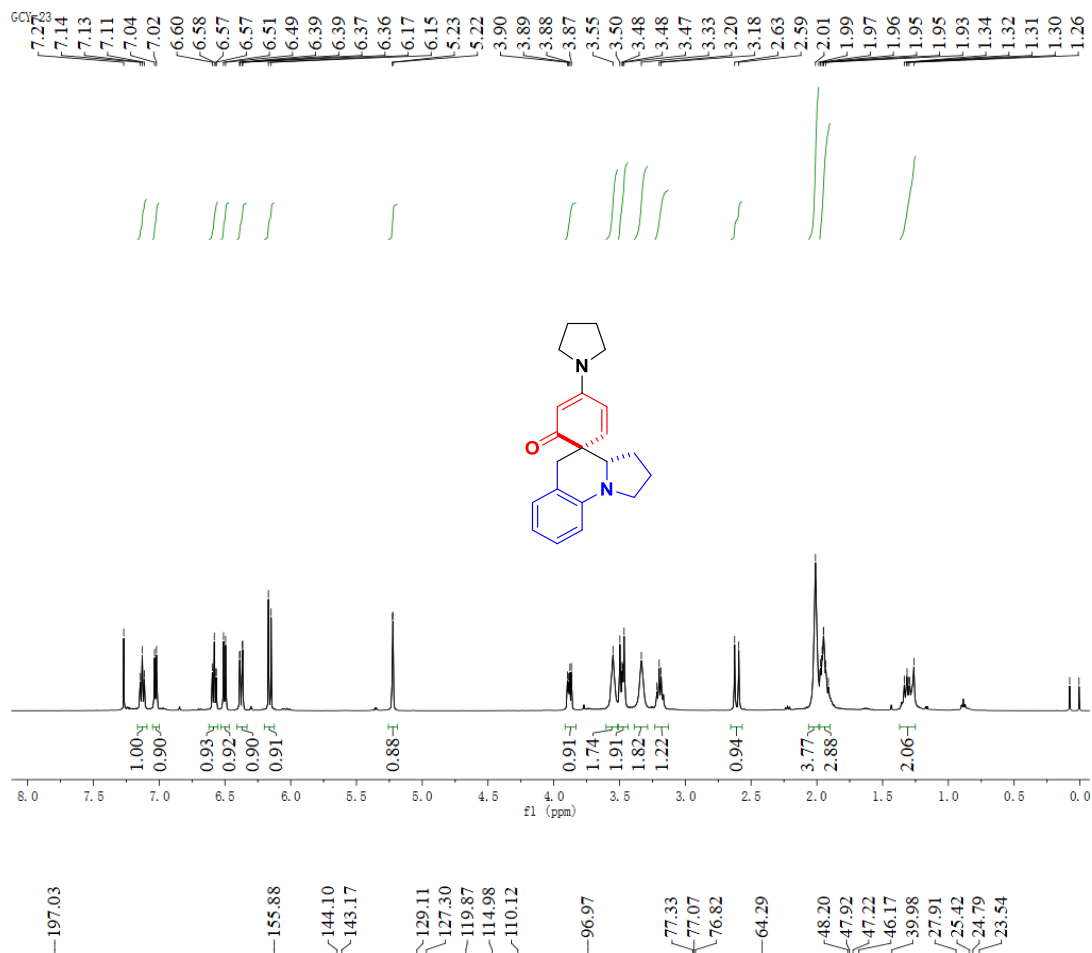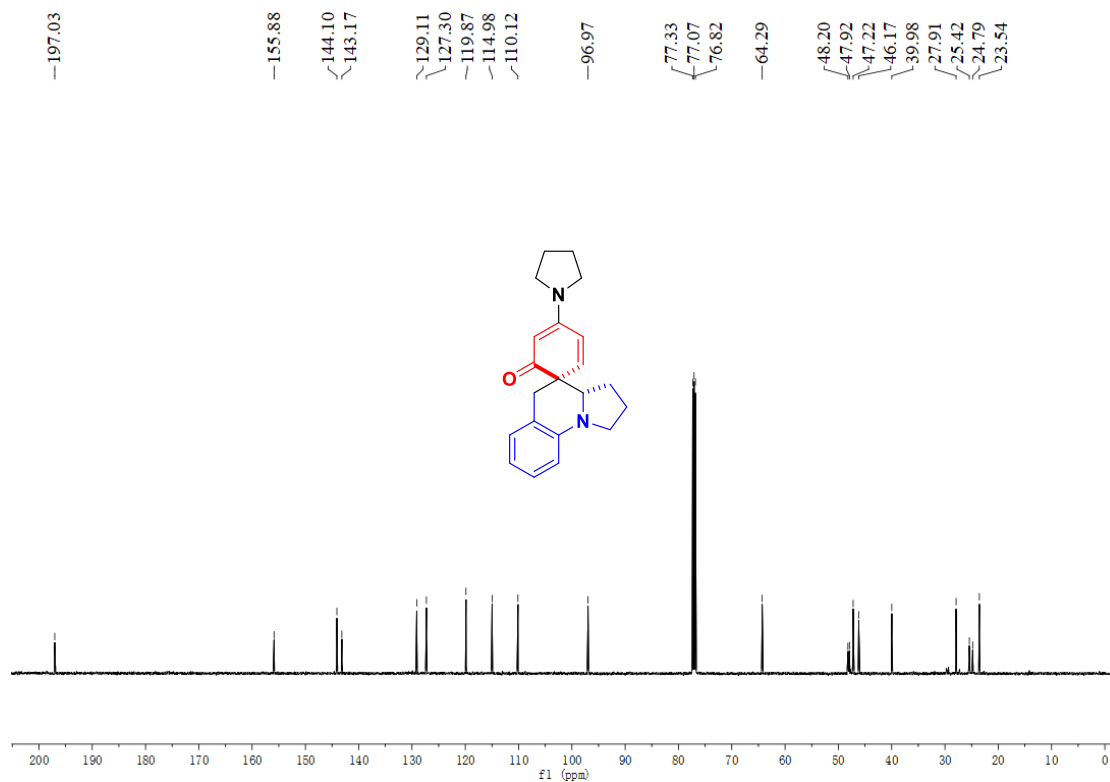

**1',2',3',3a'-tetrahydro-5'H,6H-spiro[benzo[d][1,3]dioxole-5,4'-pyrrolo[1,2-a]quinolin]-6-one  
(2j)<sup>[3]</sup>**

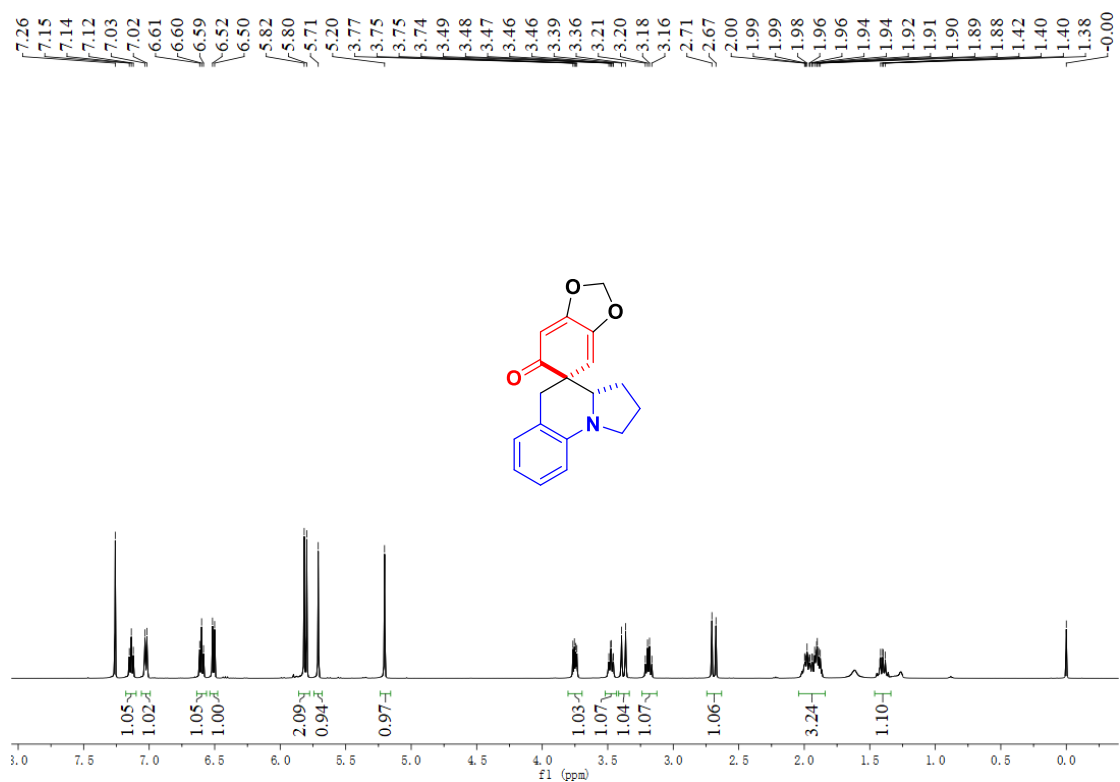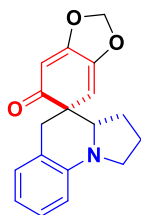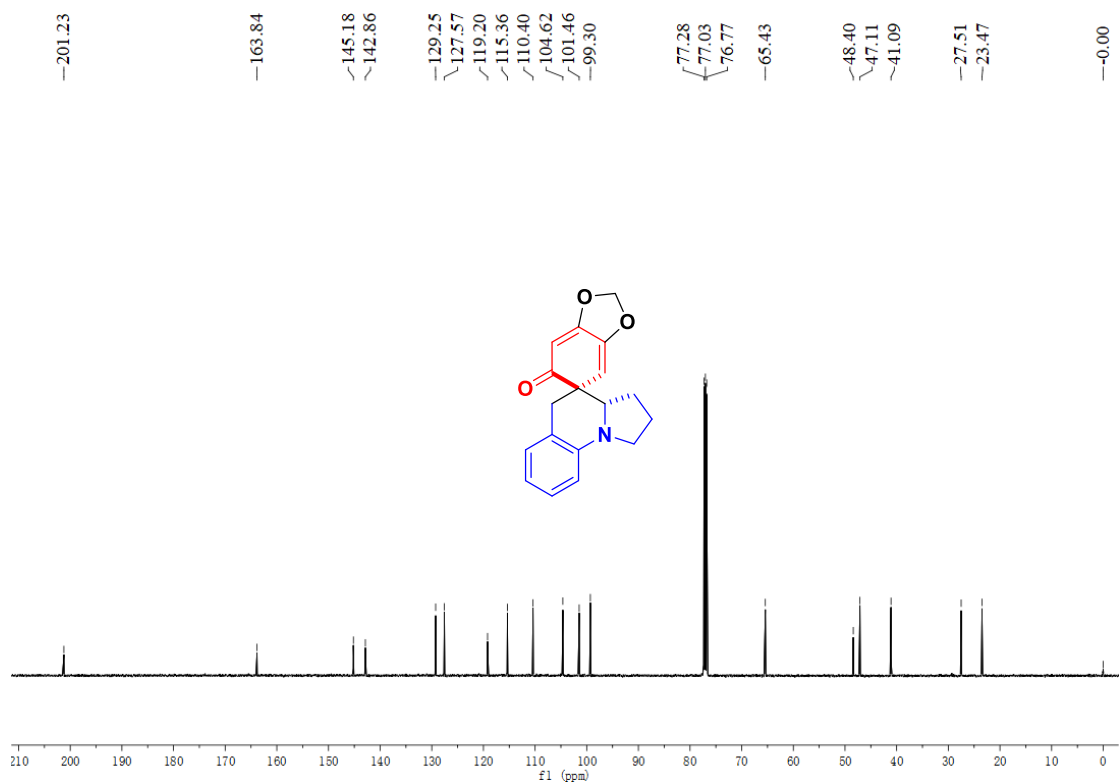

**2-(2-(2-allylpyrrolidin-1-yl)benzyl)-5-(diethylamino)phenol (3a)**

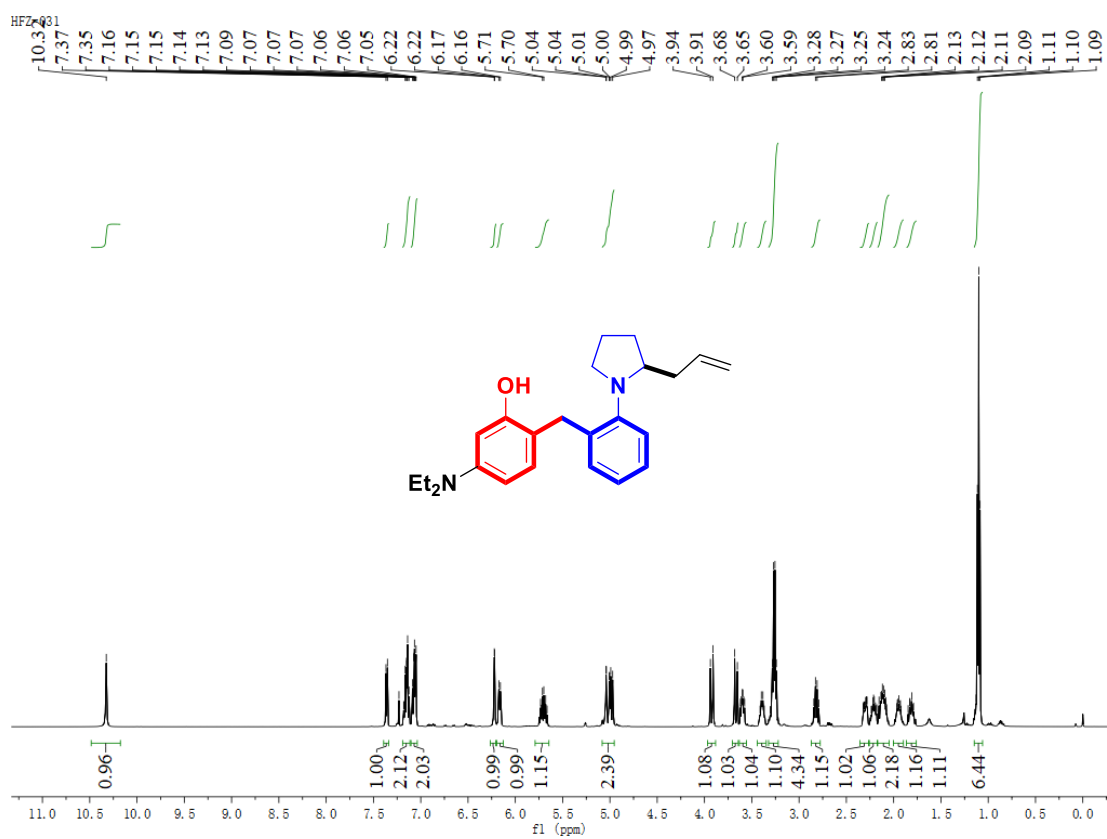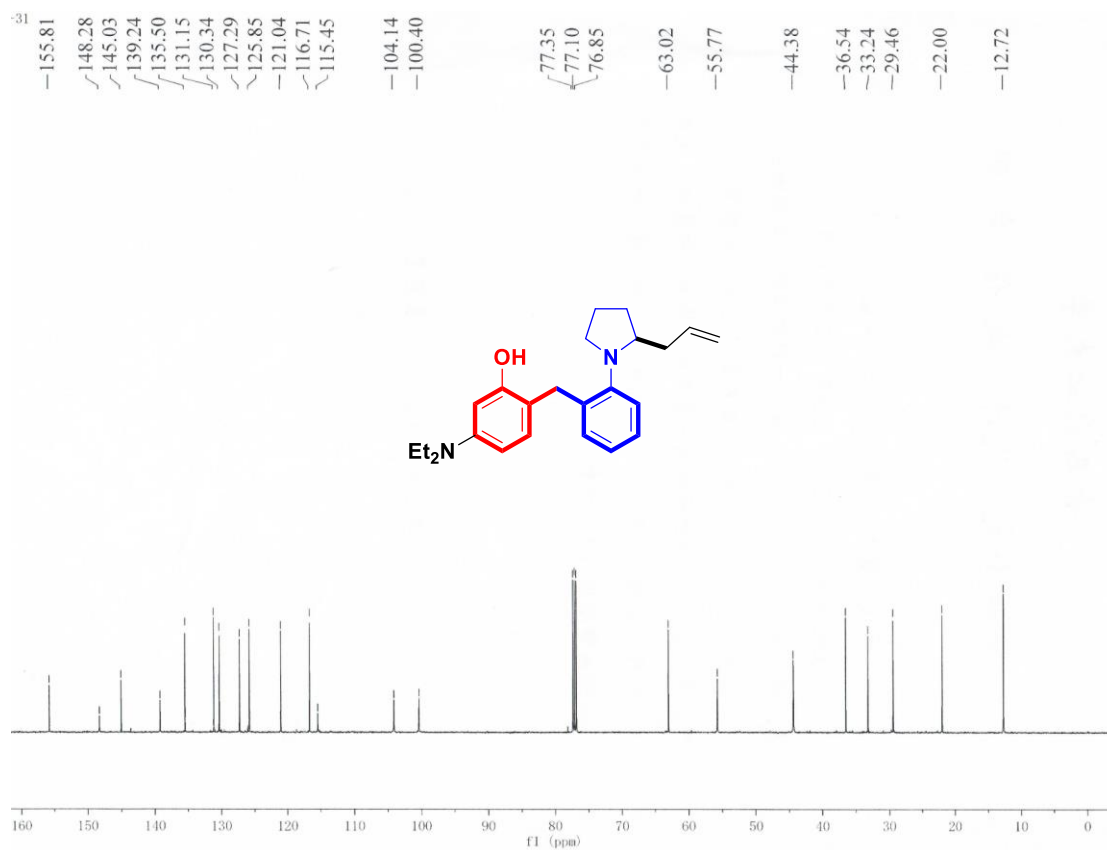

**2-(2-(2-allylpyrrolidin-1-yl)-4-methylbenzyl)-5-(diethylamino)phenol (3b)**

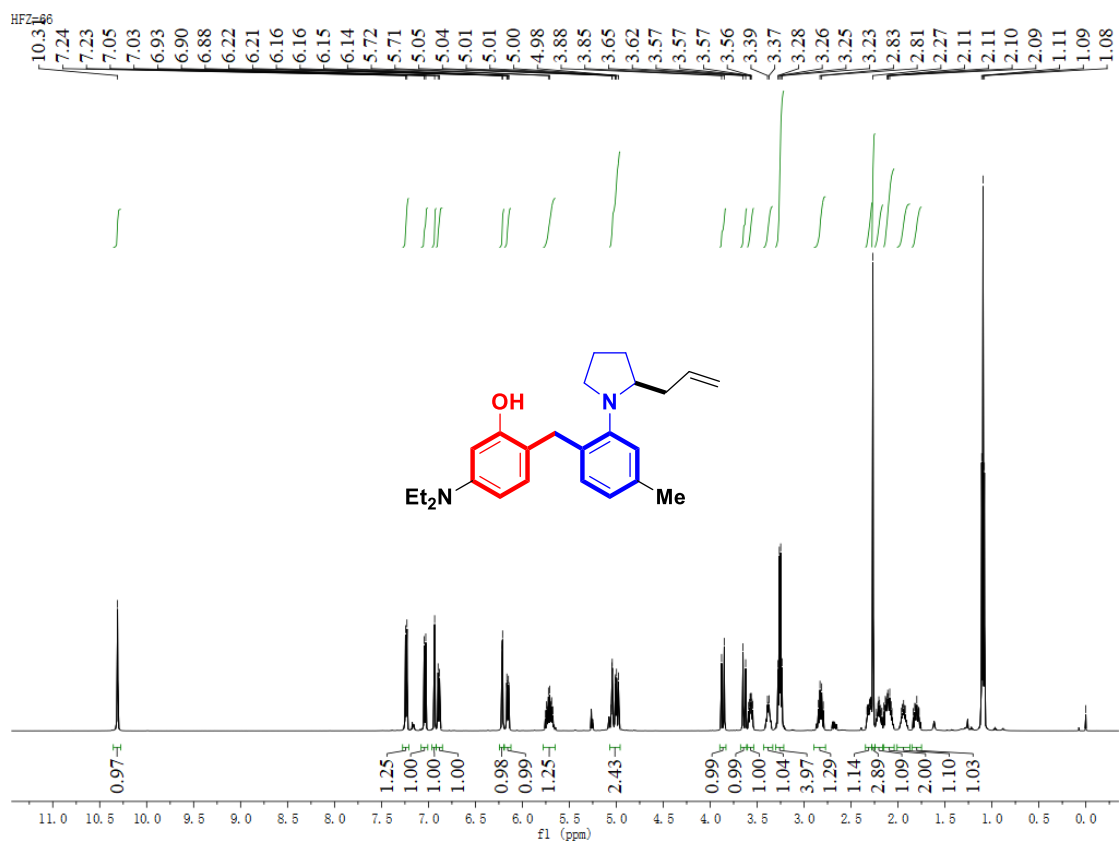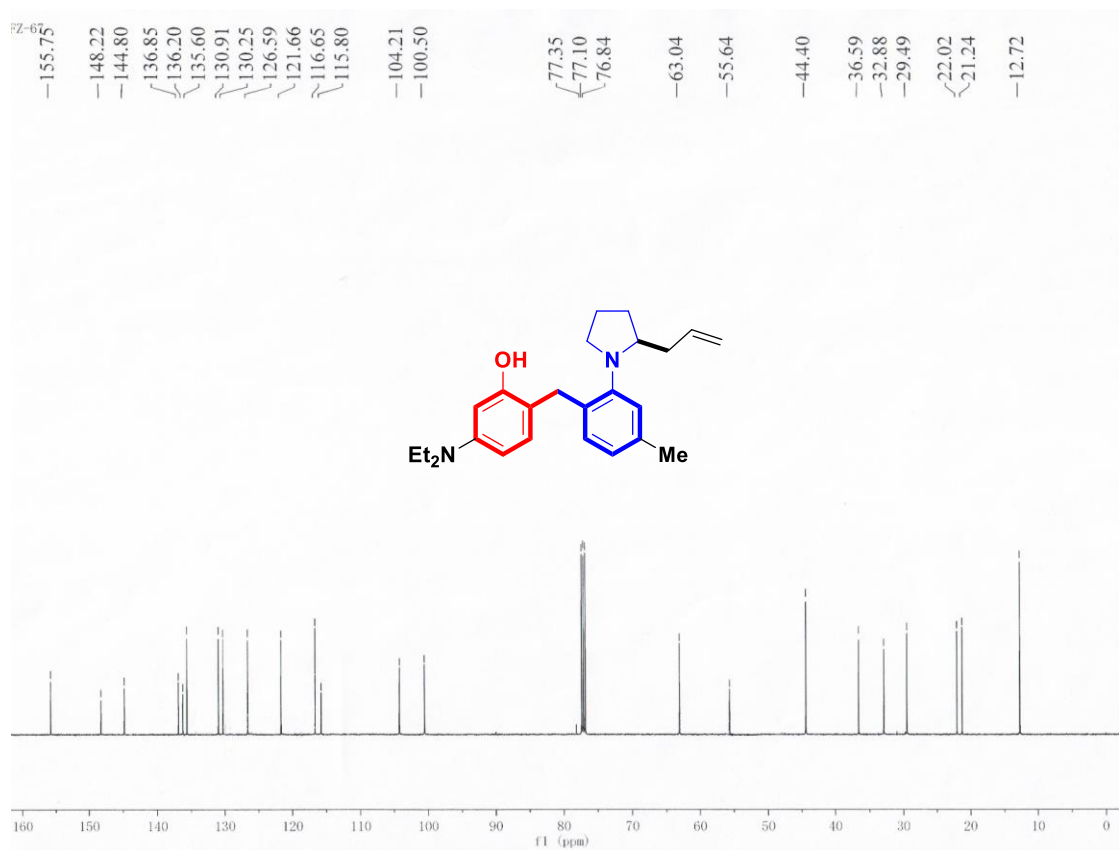

**2-(2-(2-allylpyrrolidin-1-yl)-5-methoxybenzyl)-5-(diethylamino)phenol (3c)**

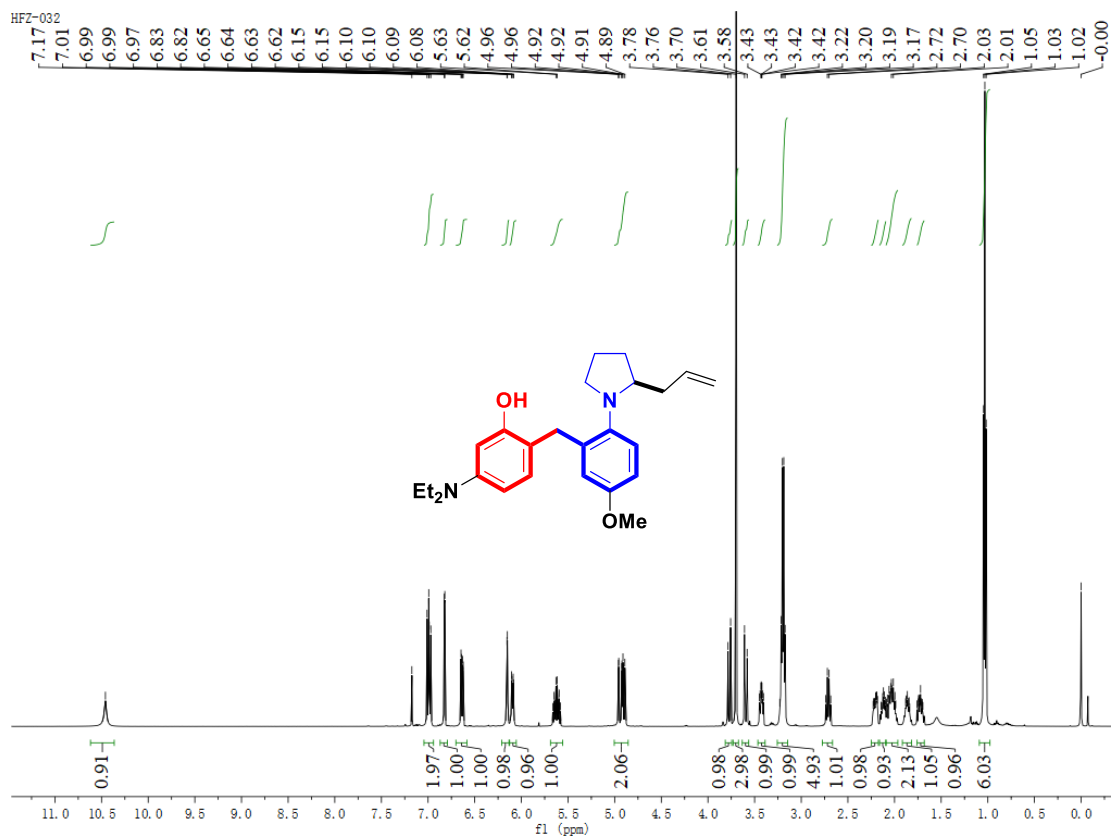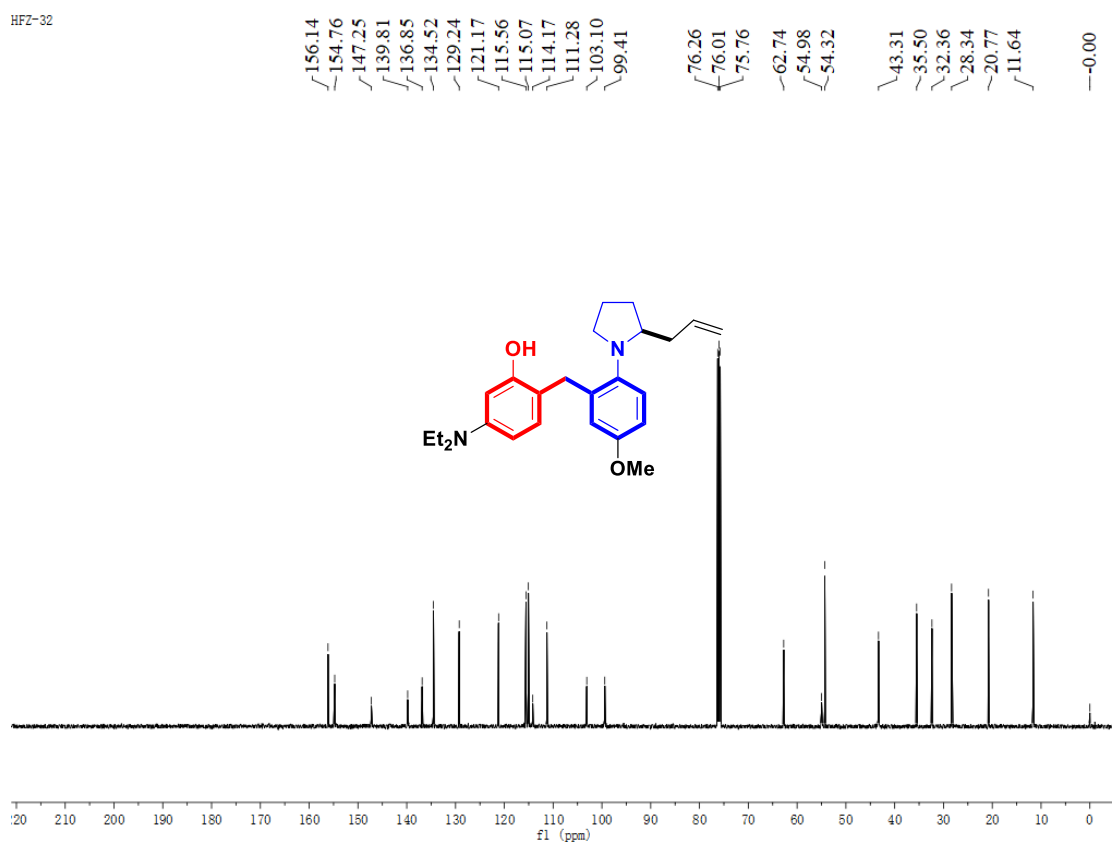



**2-(2-(2-allylpyrrolidin-1-yl)-5-chlorobenzyl)-5-(diethylamino)phenol (3d)**

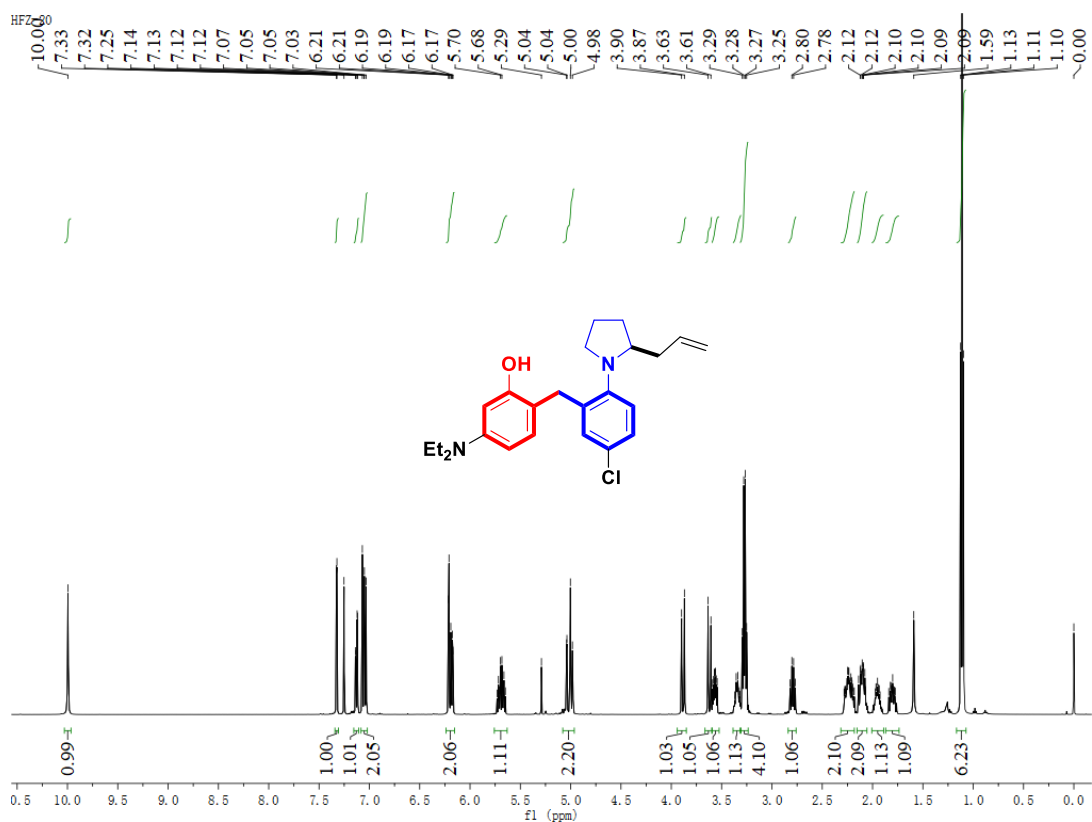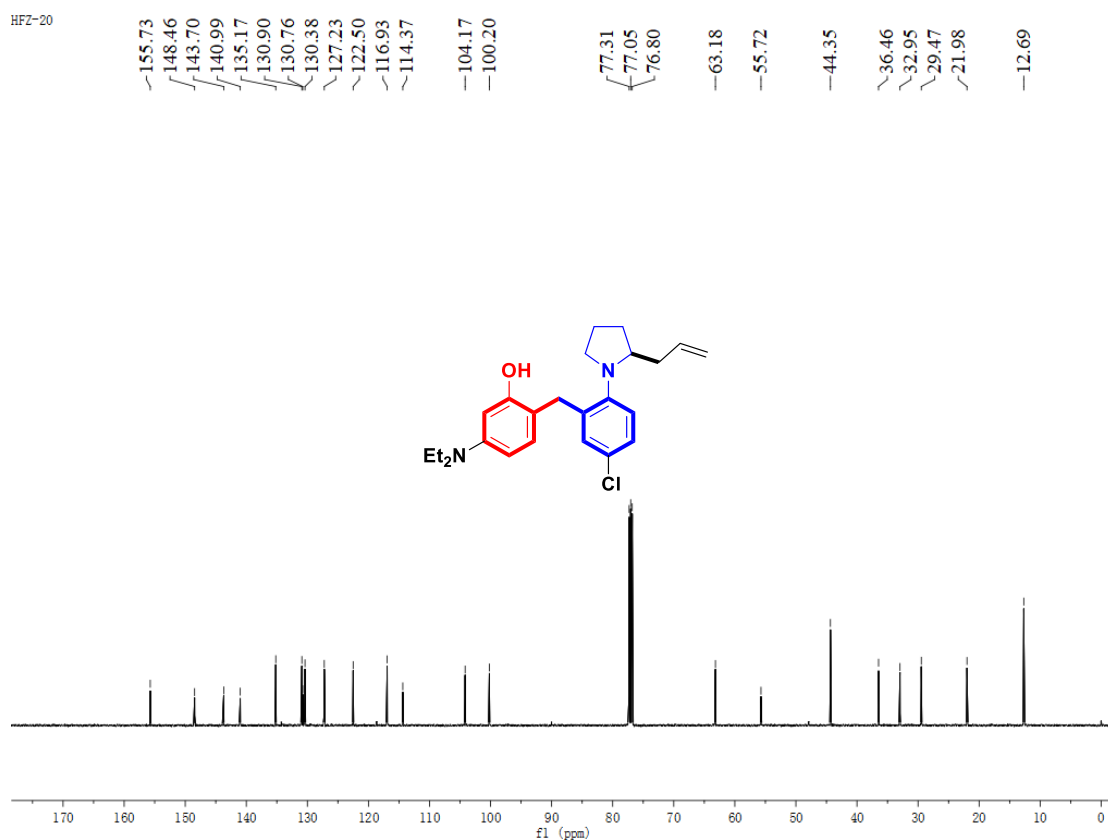

**2-(2-(2-allylpyrrolidin-1-yl)-6-fluorobenzyl)-5-(diethylamino)phenol (3e)**

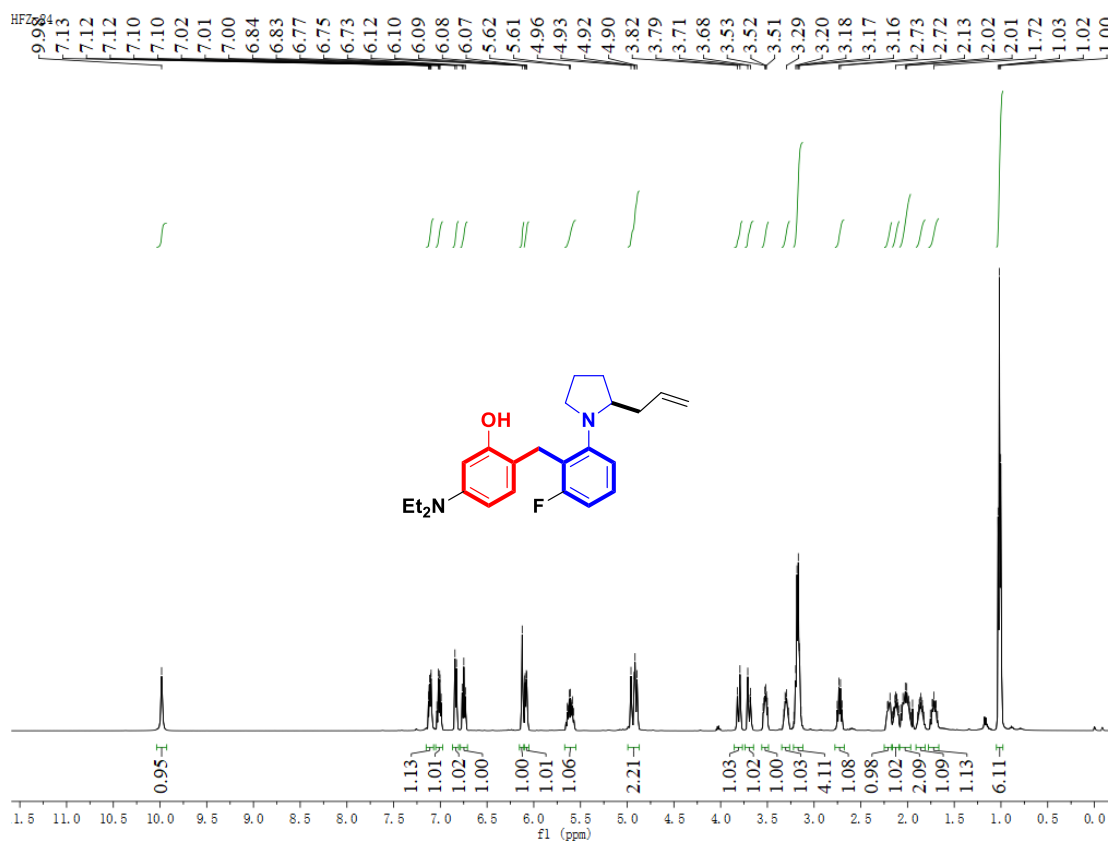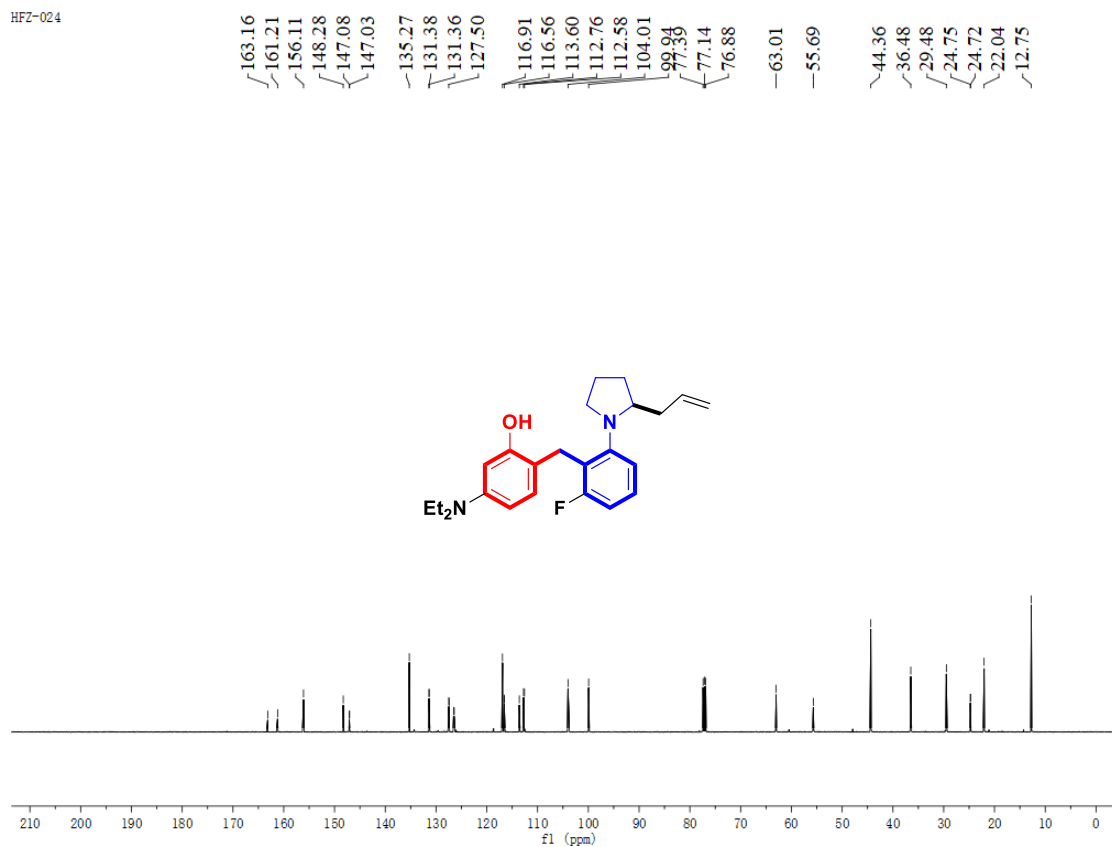

**2-(2-(2-allylpyrrolidin-1-yl)-6-chlorobenzyl)-5-(diethylamino)phenol (3f)**

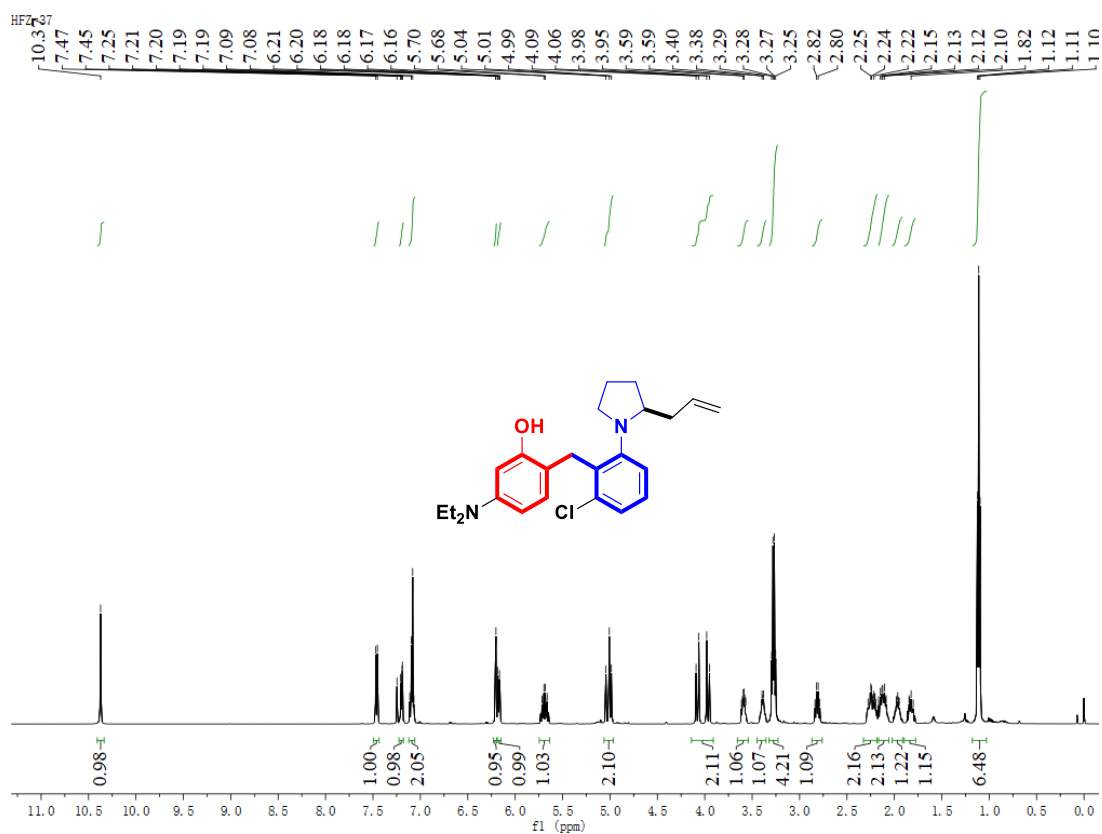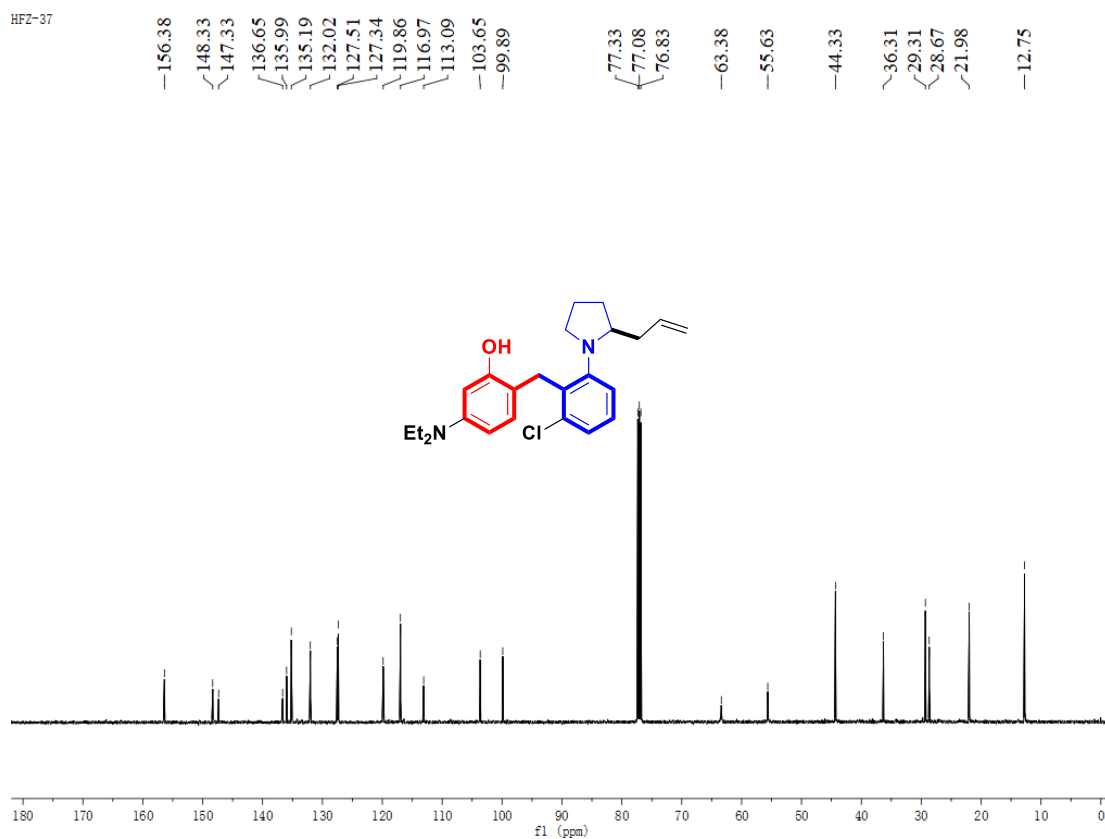

**2-(2-(2-allylpyrrolidin-1-yl)-6-bromobenzyl)-5-(diethylamino)phenol (3g)**

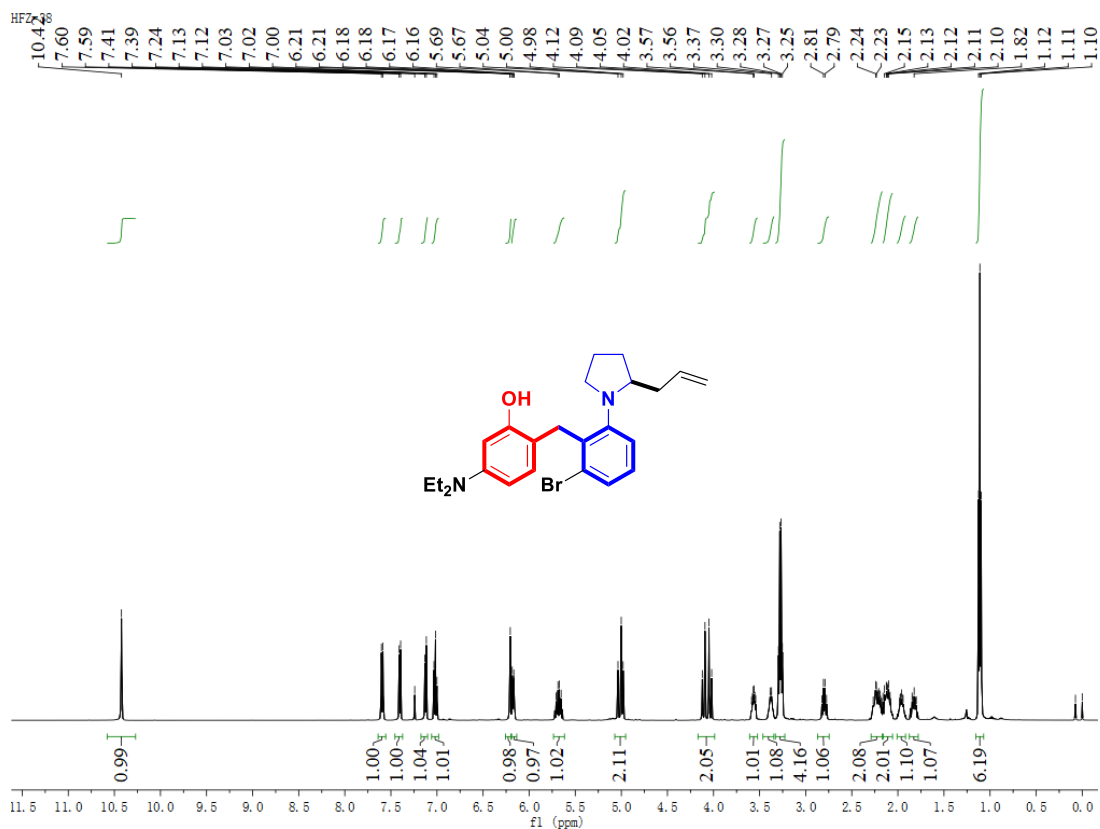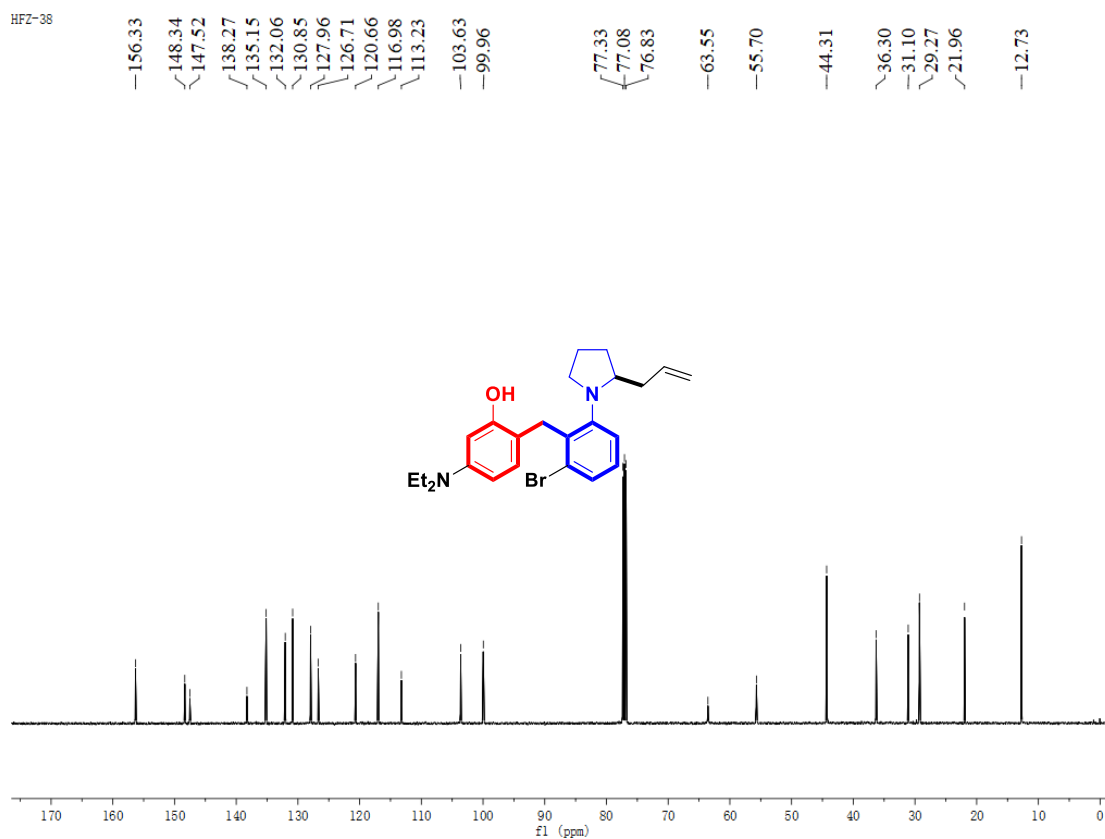

**2-(2-(1-allyloctahydro-2H-isoindol-2-yl)benzyl)-5-(diethylamino)phenol (3h)**

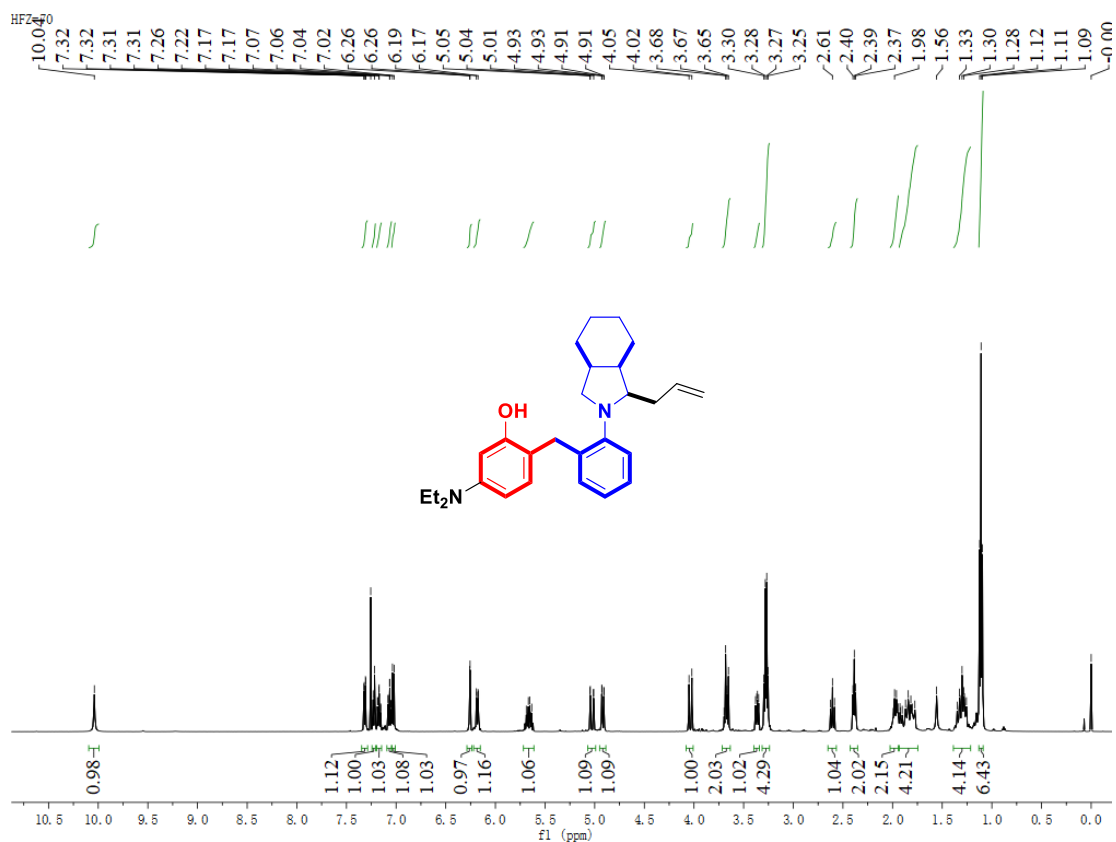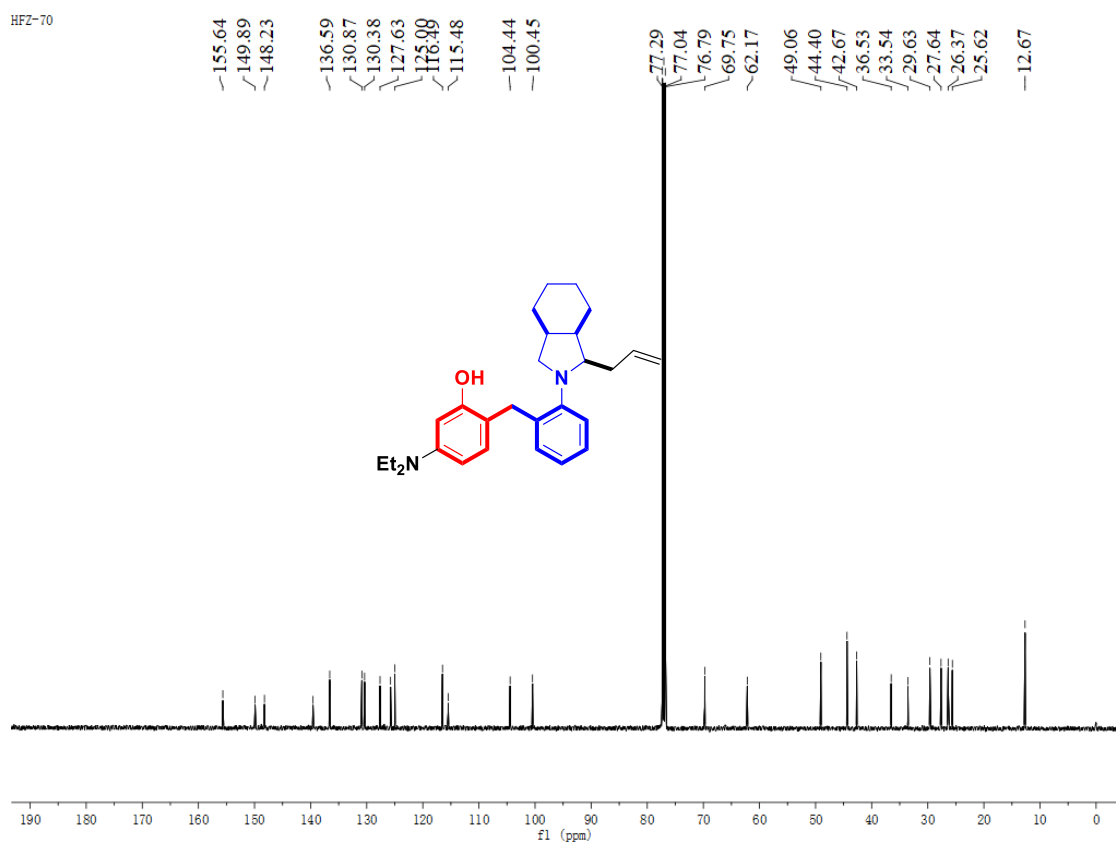

**2-(2-(2-allylpyrrolidin-1-yl)benzyl)-5-(pyrrolidin-1-yl)phenol (3i)**

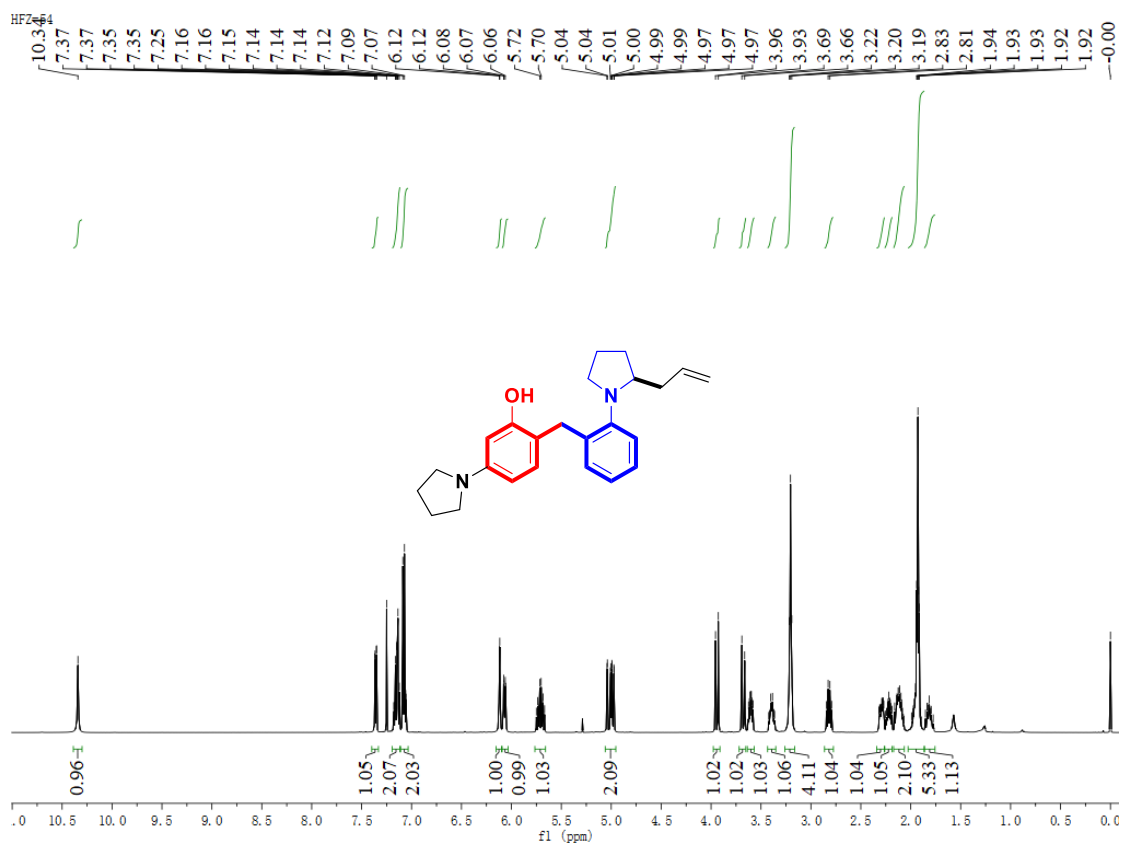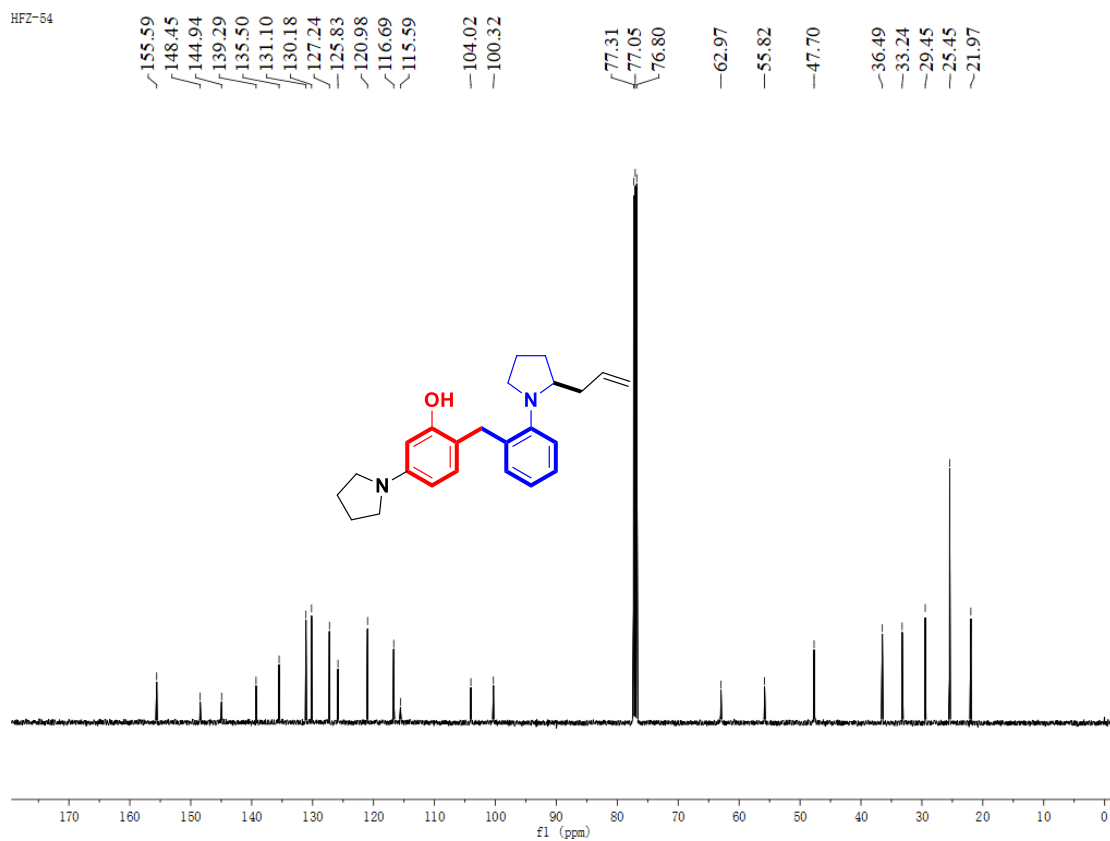

**6-(4-methyl-2-(2-vinylpyrrolidin-1-yl)benzyl)benzo[d][1,3]dioxol-5-ol (3j)**

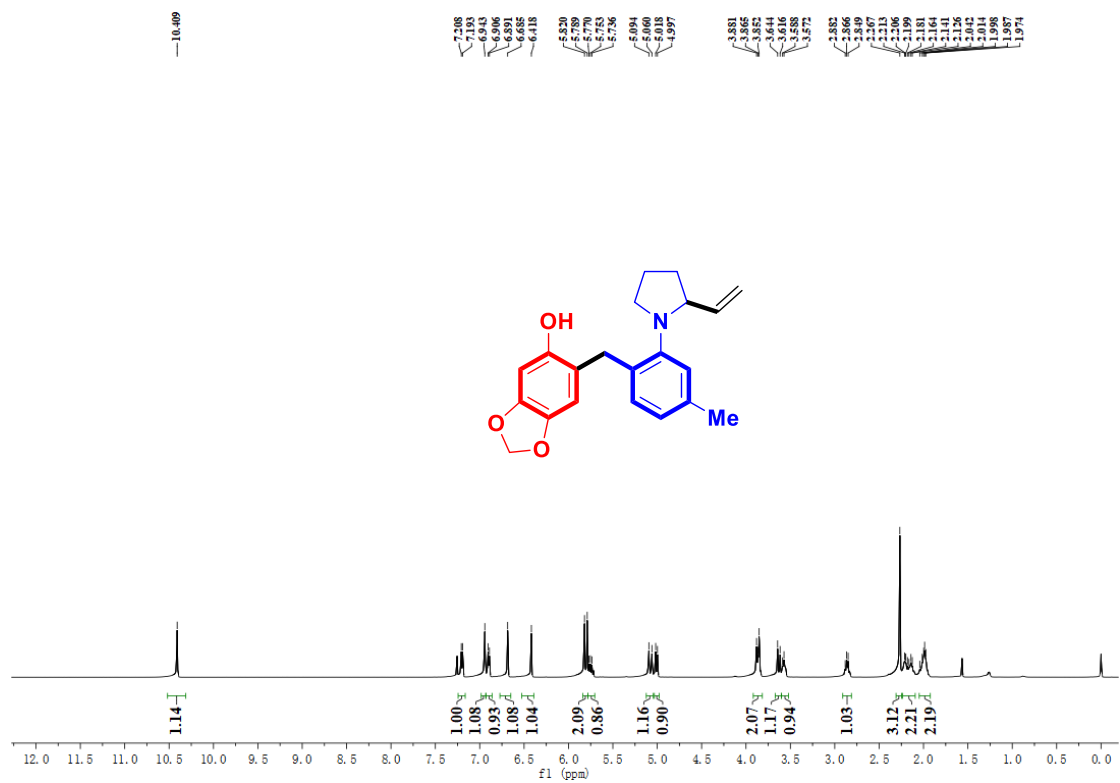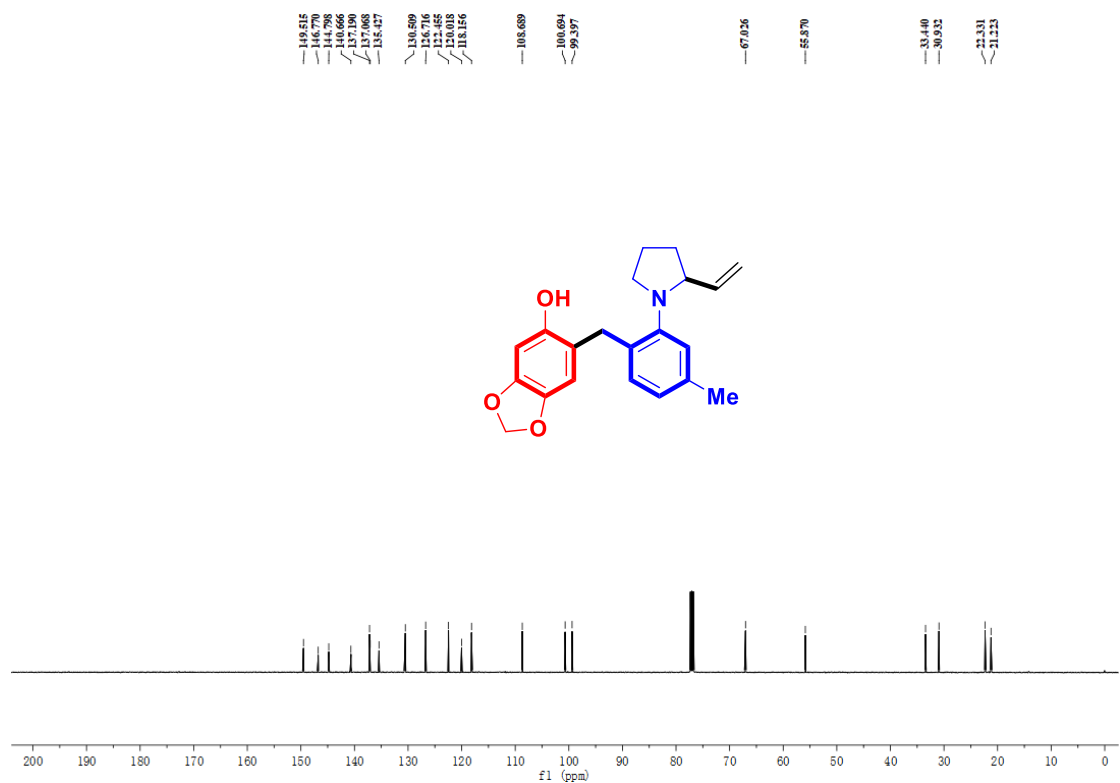

6-(5-chloro-2-(2-vinylpyrrolidin-1-yl)benzyl)benzo[d][1,3]dioxol-5-ol (3k)

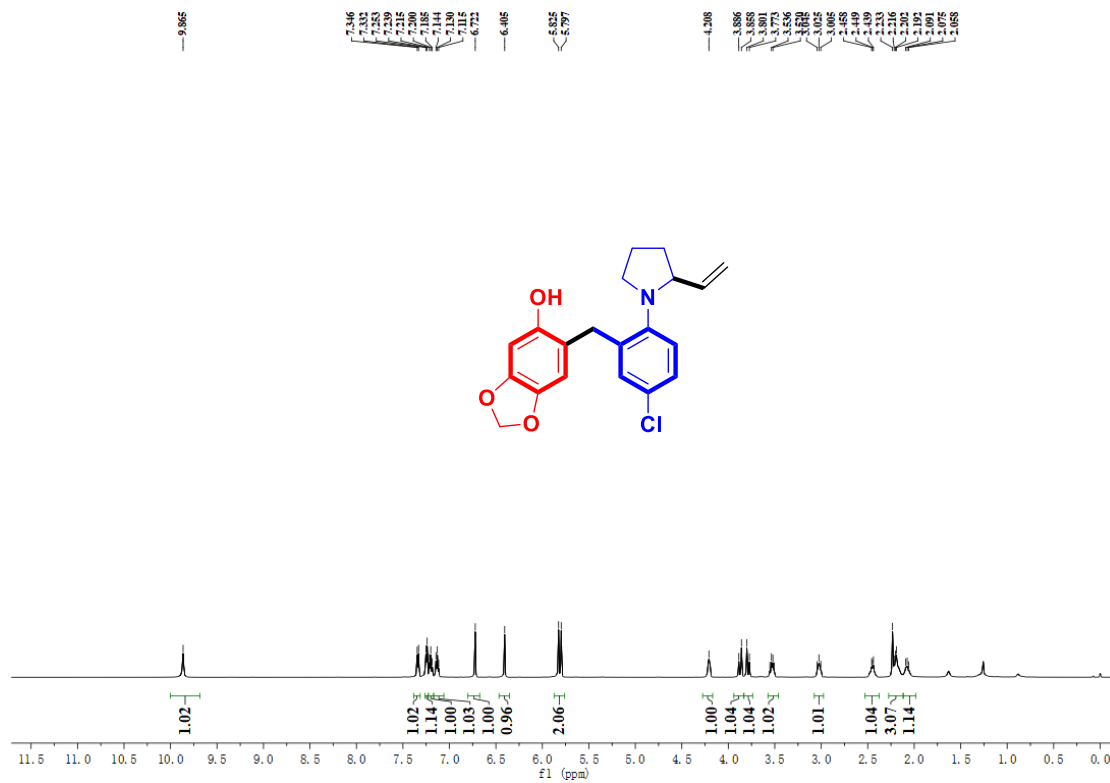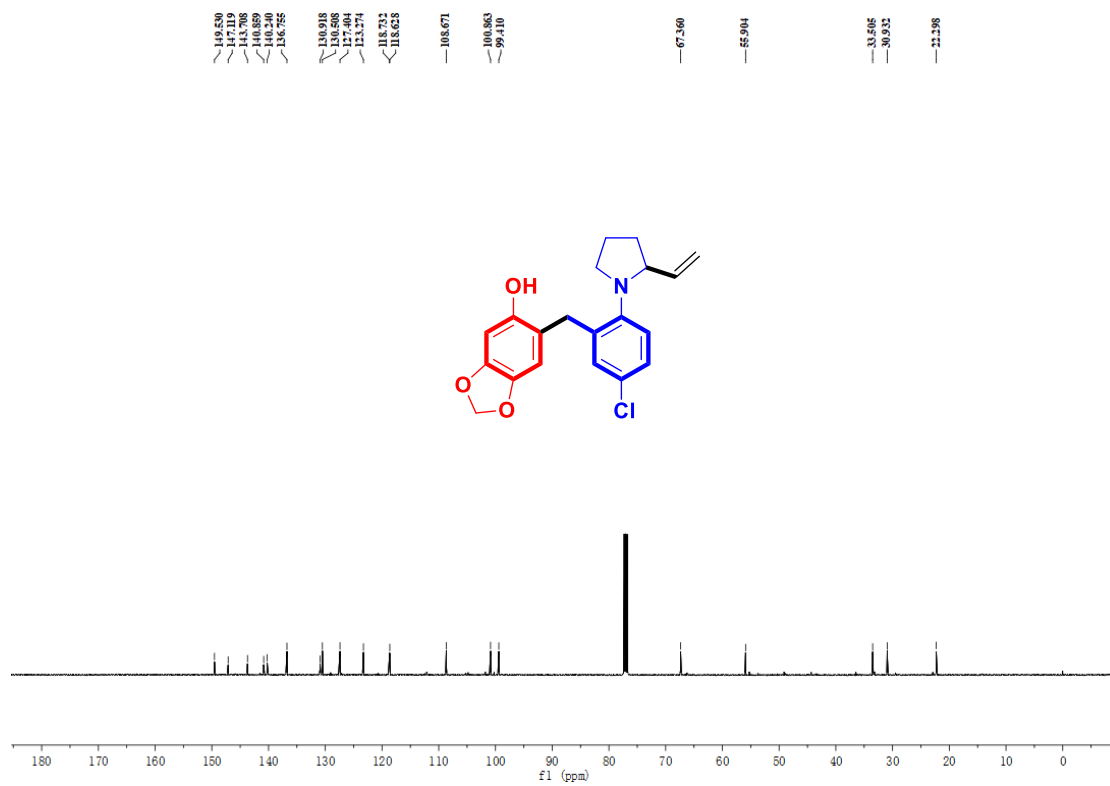



**6-(2-(2-ethynylpyrrolidin-1-yl)benzyl)benzo[d][1,3]dioxol-5-ol (3l)<sup>[3]</sup>**

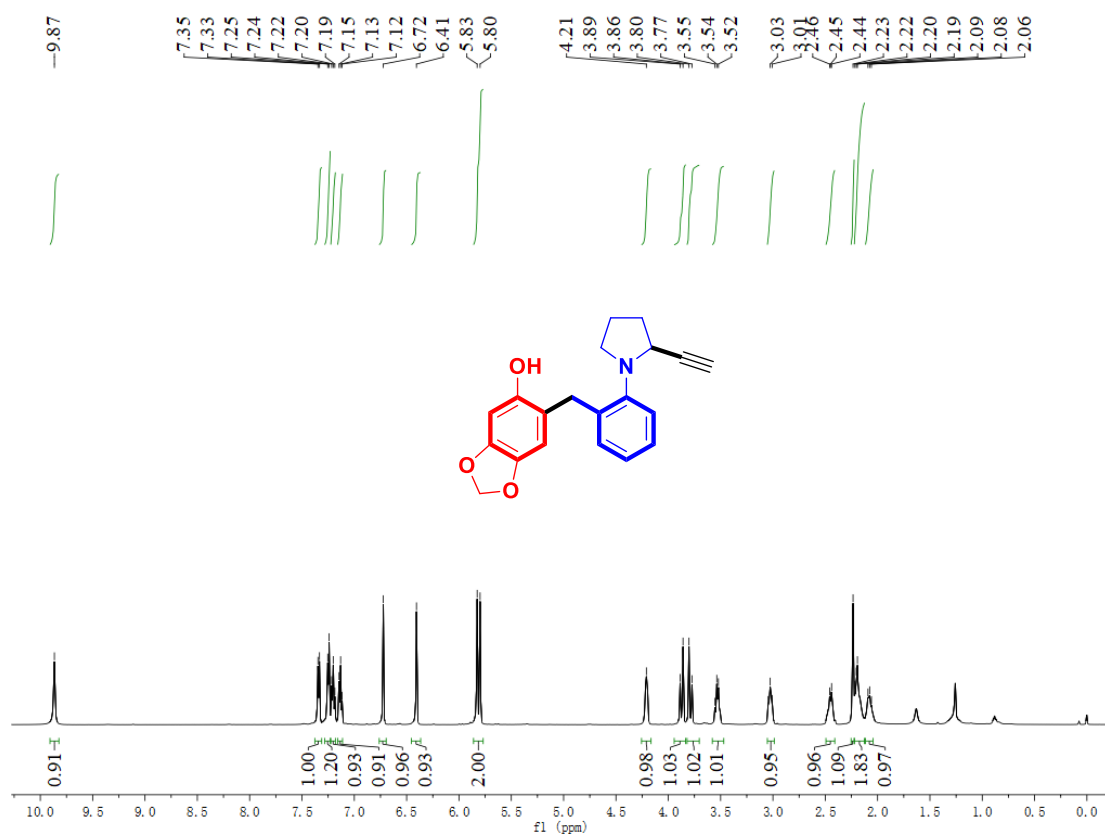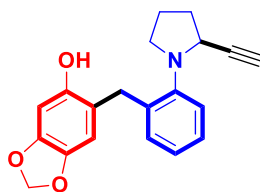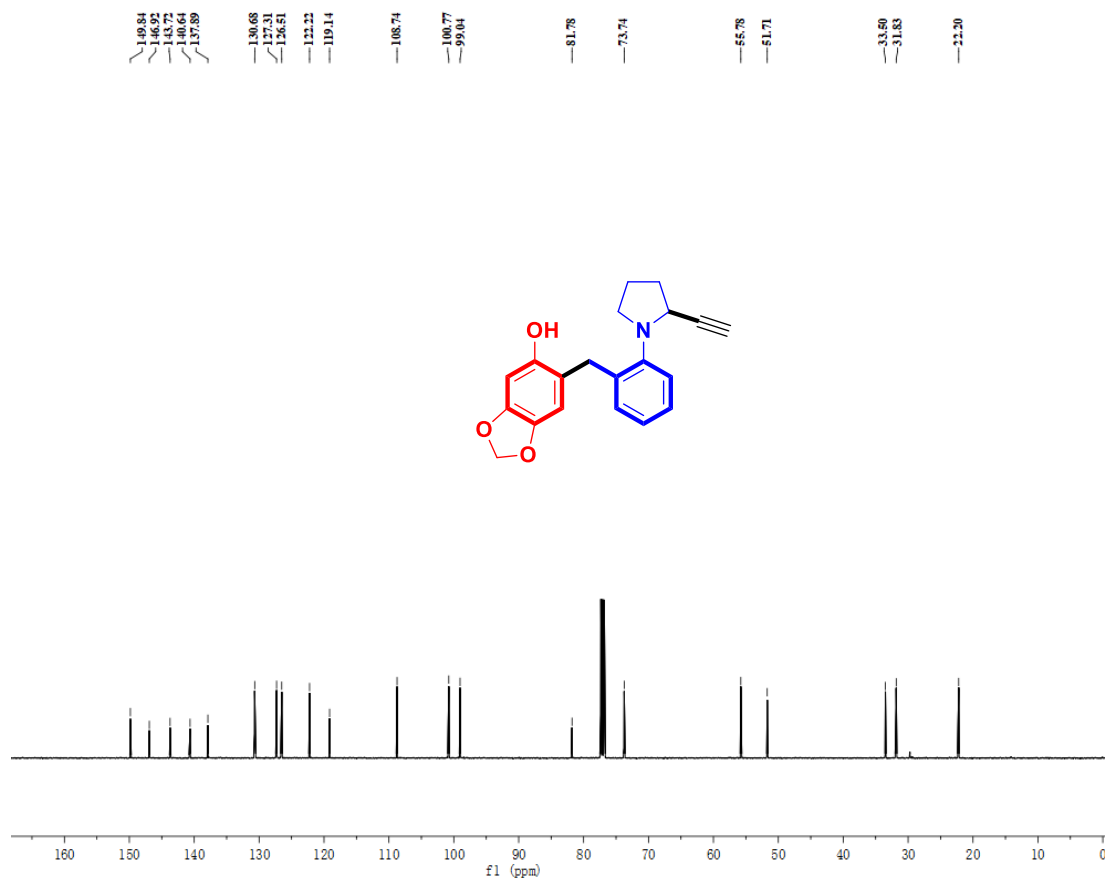

**2-(5-chloro-2-(2-methylpyrrolidin-1-yl)benzyl)-5-(diethylamino)phenol (3m)**

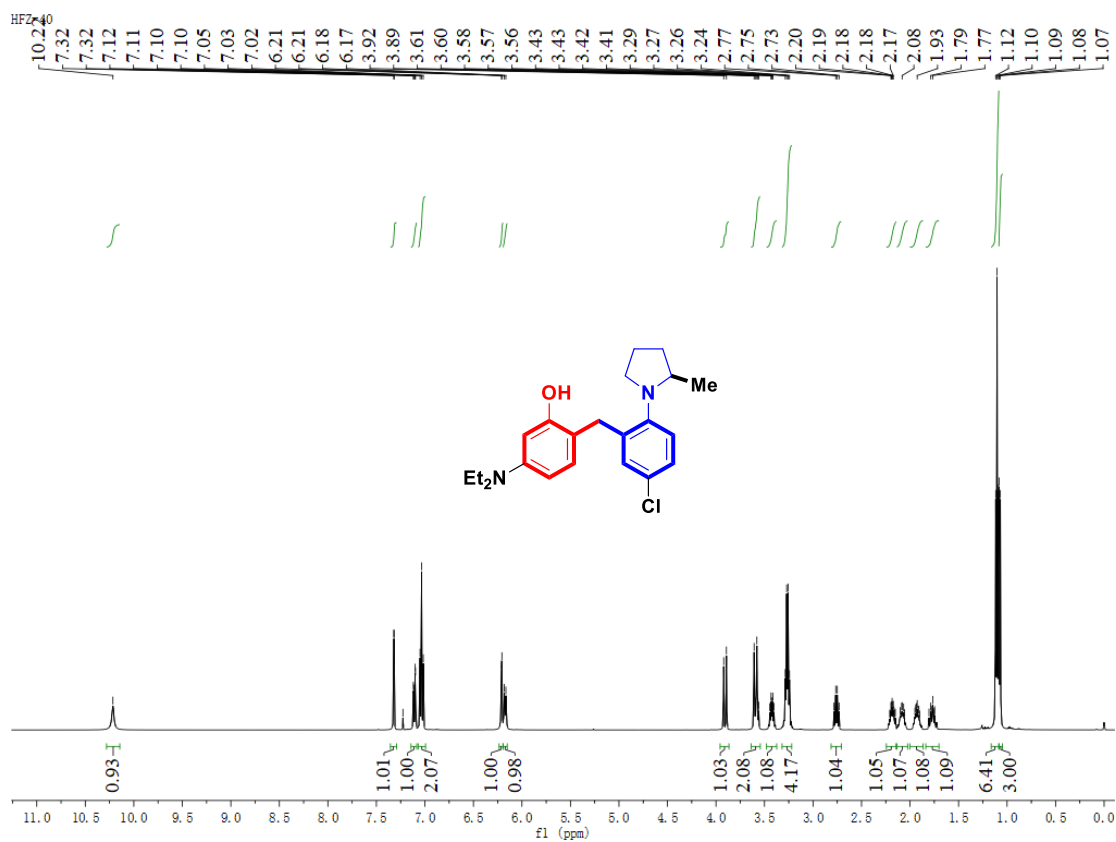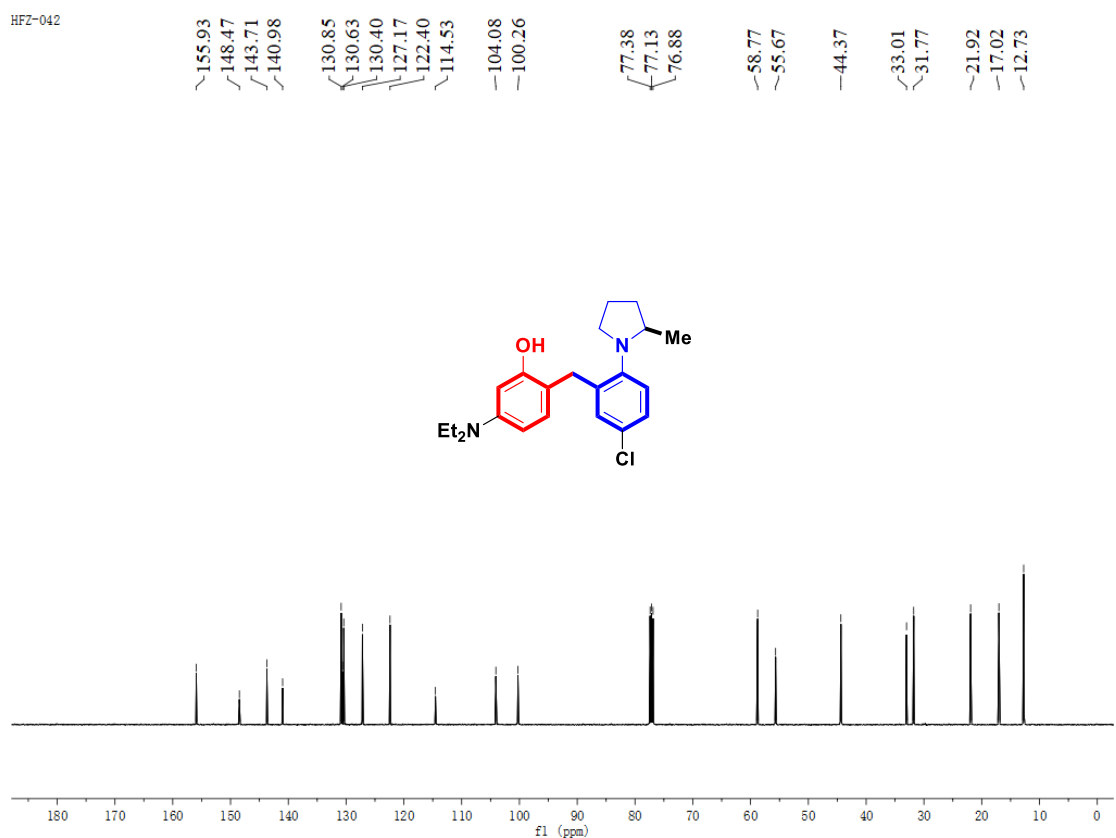

**5-(diethylamino)-2-(2-(2-ethylpyrrolidin-1-yl)-5-methoxybenzyl)phenol (3n)**

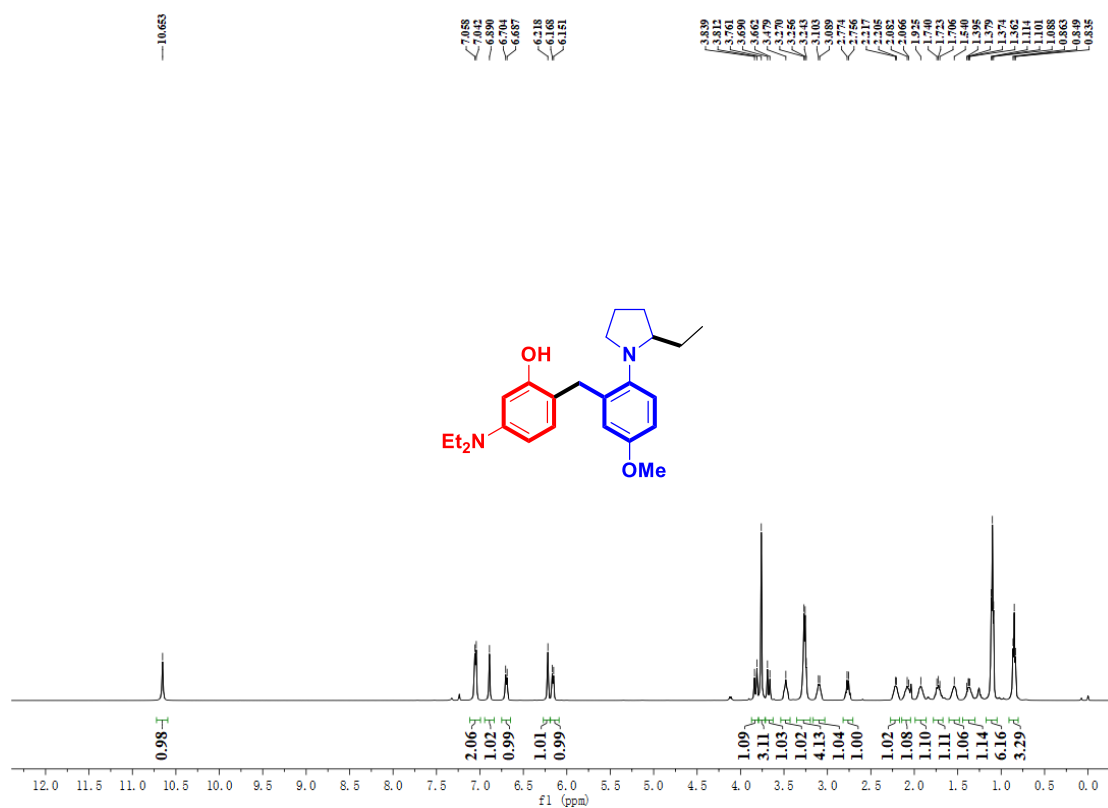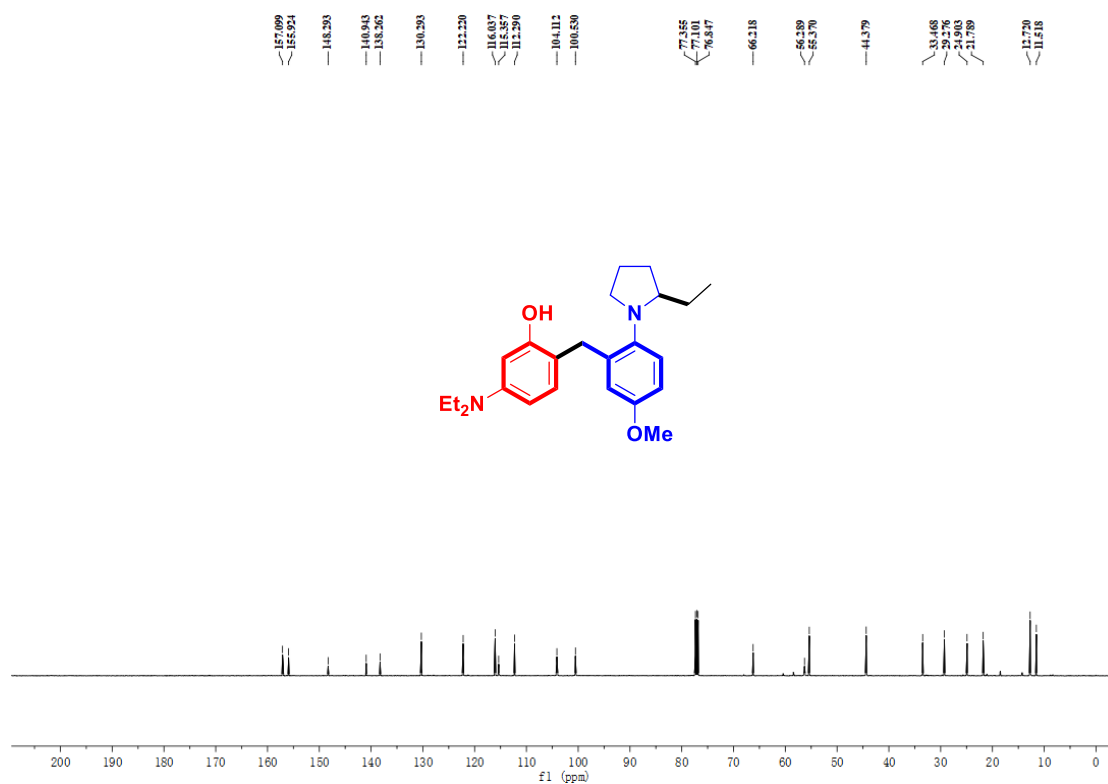

**2-(5-chloro-2-(2-phenylpyrrolidin-1-yl)benzyl)-5-(diethylamino)phenol (3o)**

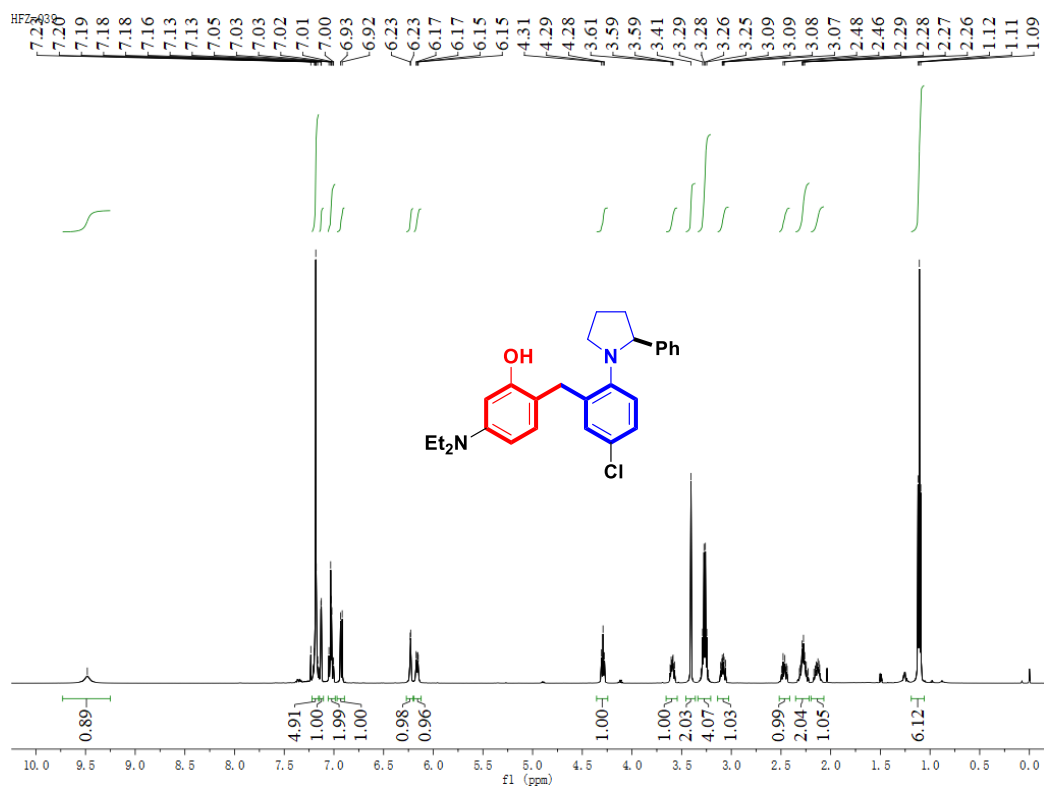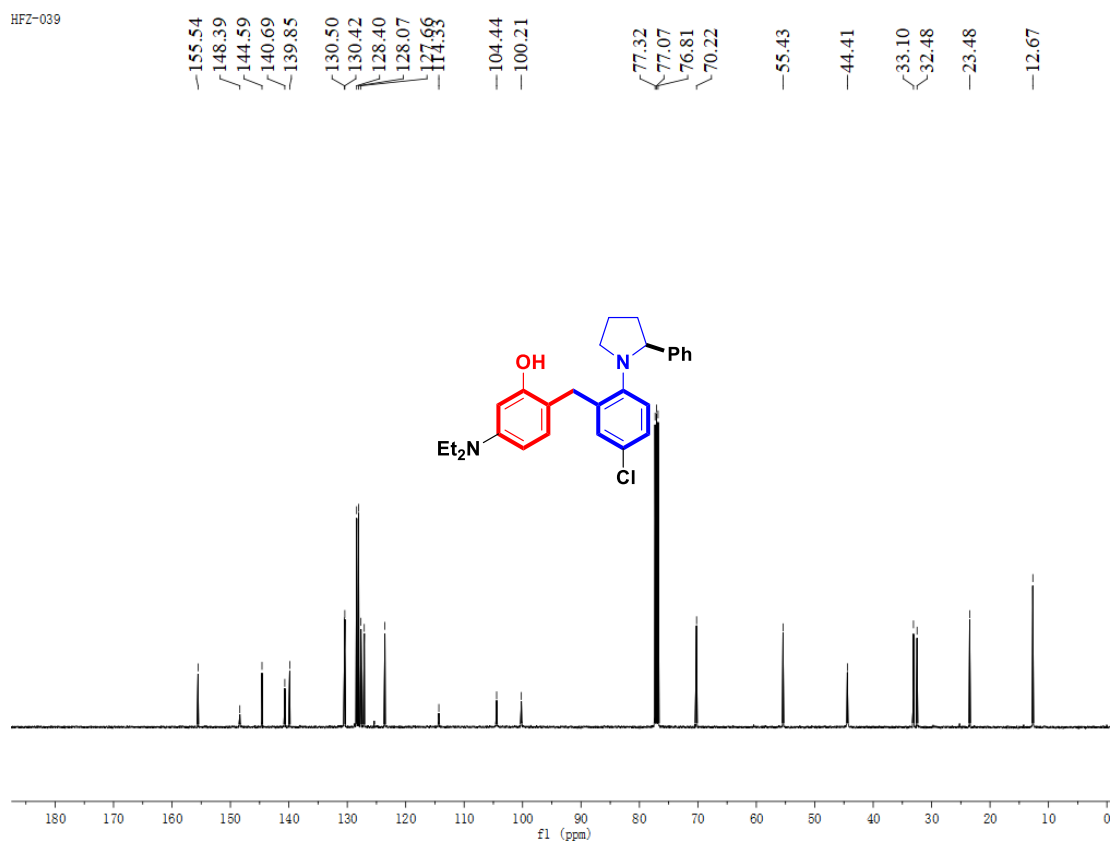

**1'-allyl-4-(diethylamino)-1',2',3',3a'-tetrahydro-5'H-spiro[cyclohexane-1,4'-pyrrolo[1,2-a]quinoline]-2,4-dien-6-one (4a)**

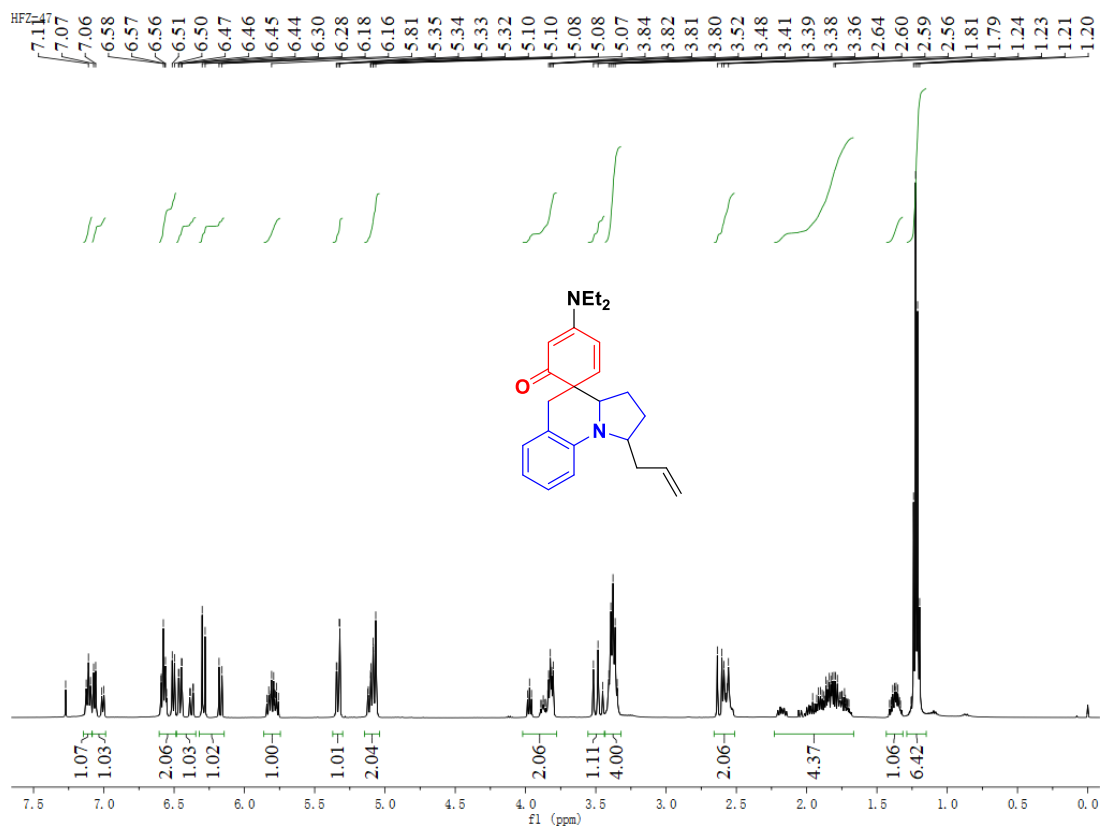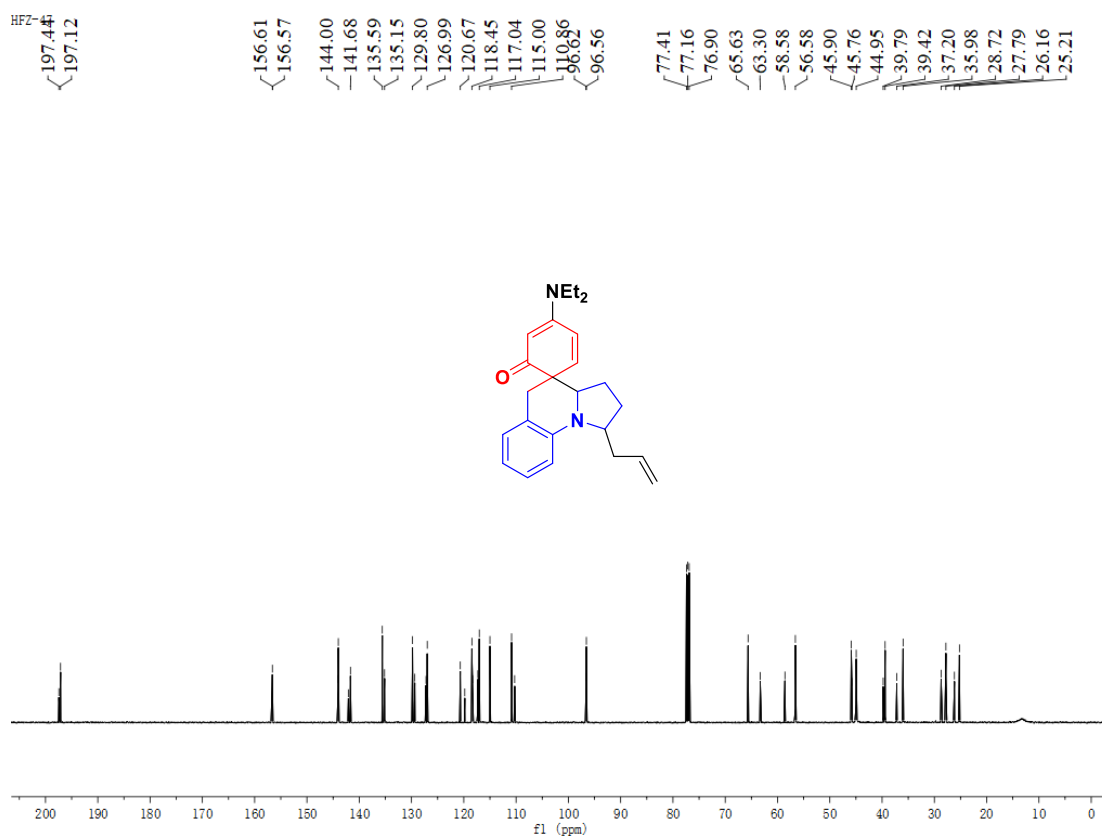

**1'-allyl-4-(diethylamino)-8'-methyl-1',2',3',3a'-tetrahydro-5'H-spiro[cyclohexane-1,4'-pyrrolo[1,2-a]quinoline]-2,4-dien-6-one (4b)**

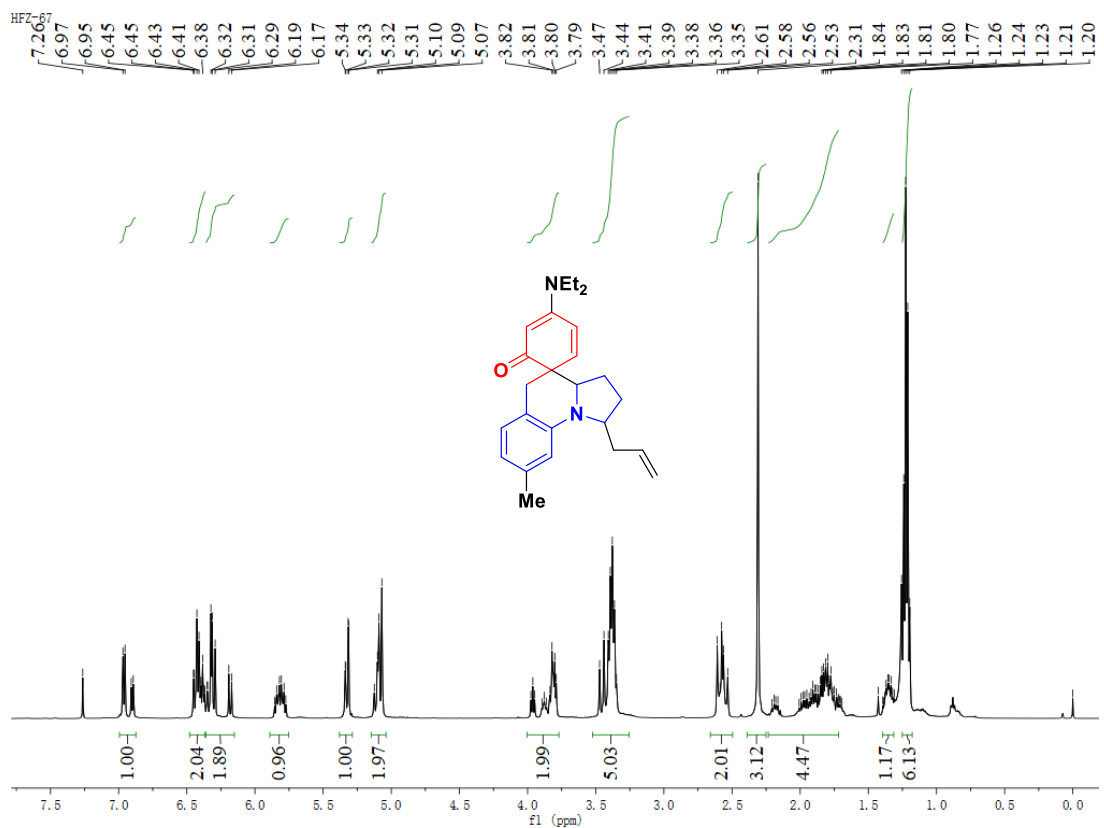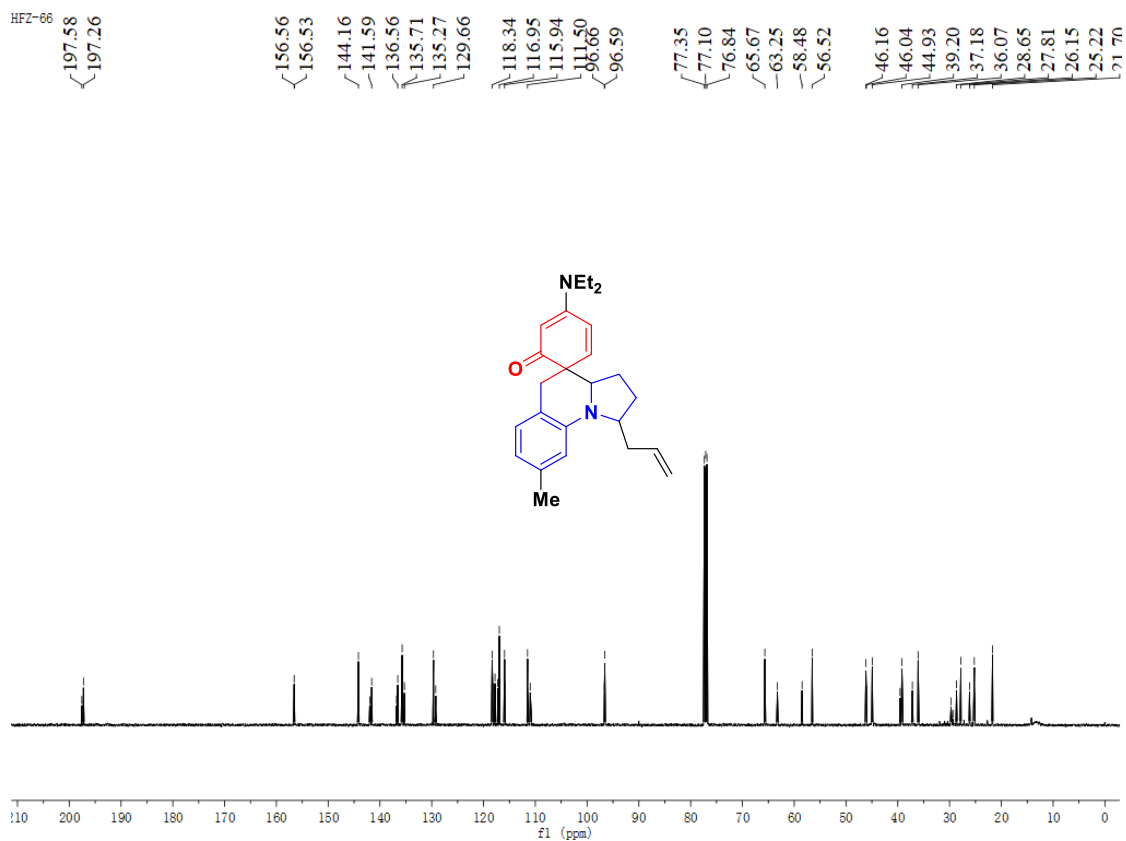

**1'-allyl-4-(diethylamino)-7'-methoxy-1',2',3',3a'-tetrahydro-5'H-spiro[cyclohexane-1,4'-pyrrolo[1,2-a]quinoline]-2,4-dien-6-one (4c)**

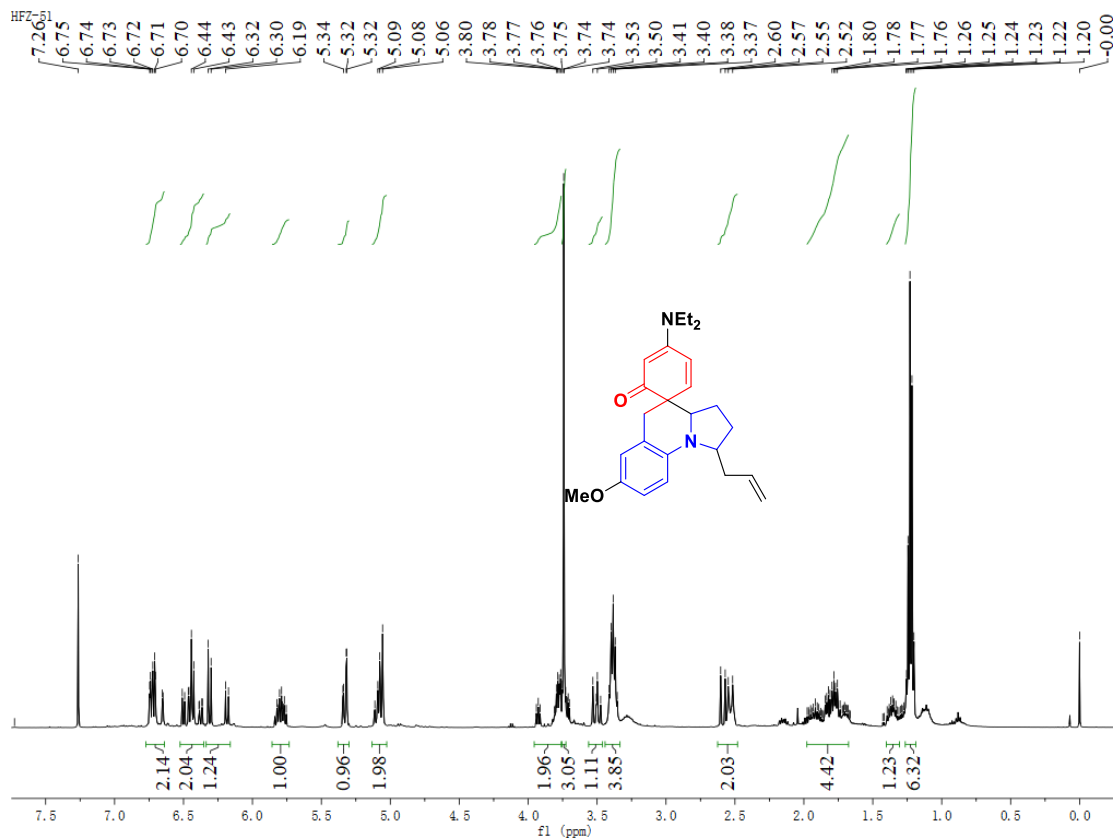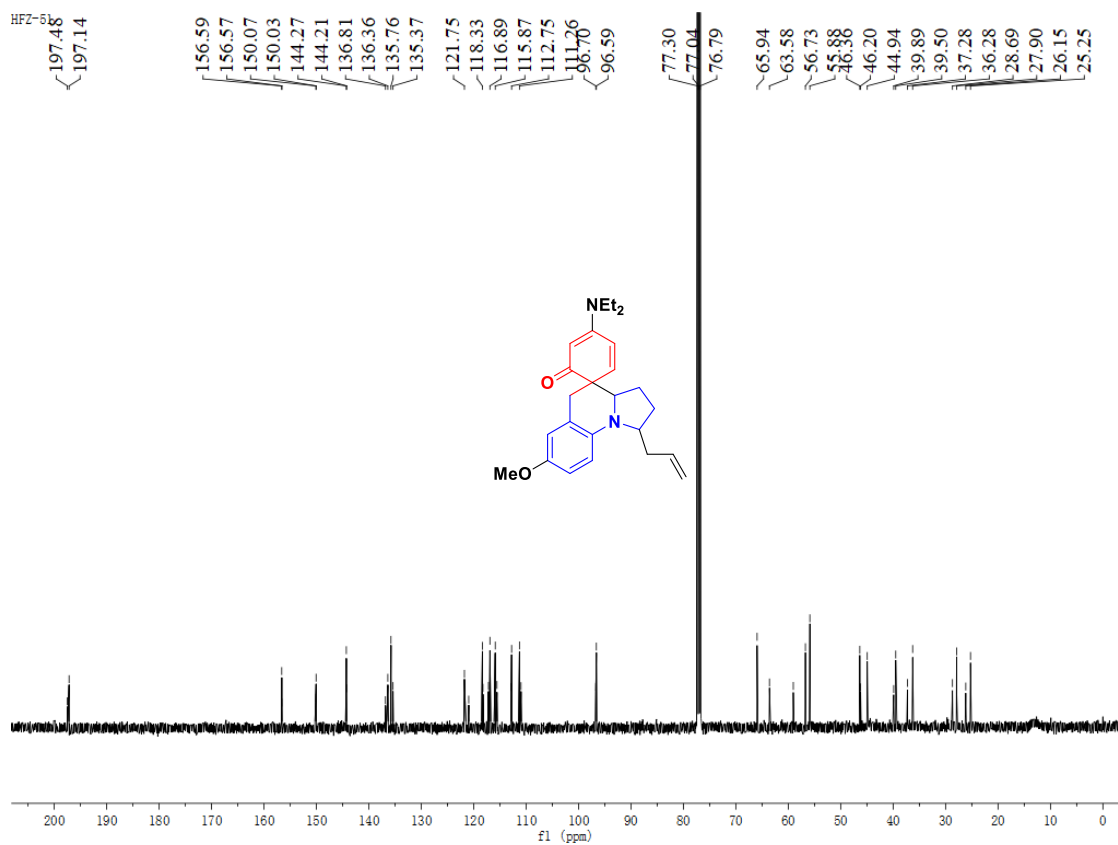

**1'-allyl-7'-chloro-4-(diethylamino)-1',2',3',3a'-tetrahydro-5'H-spiro[cyclohexane-1,4'-pyrrolo[1,2-a]quinoline]-2,4-dien-6-one (4d)**

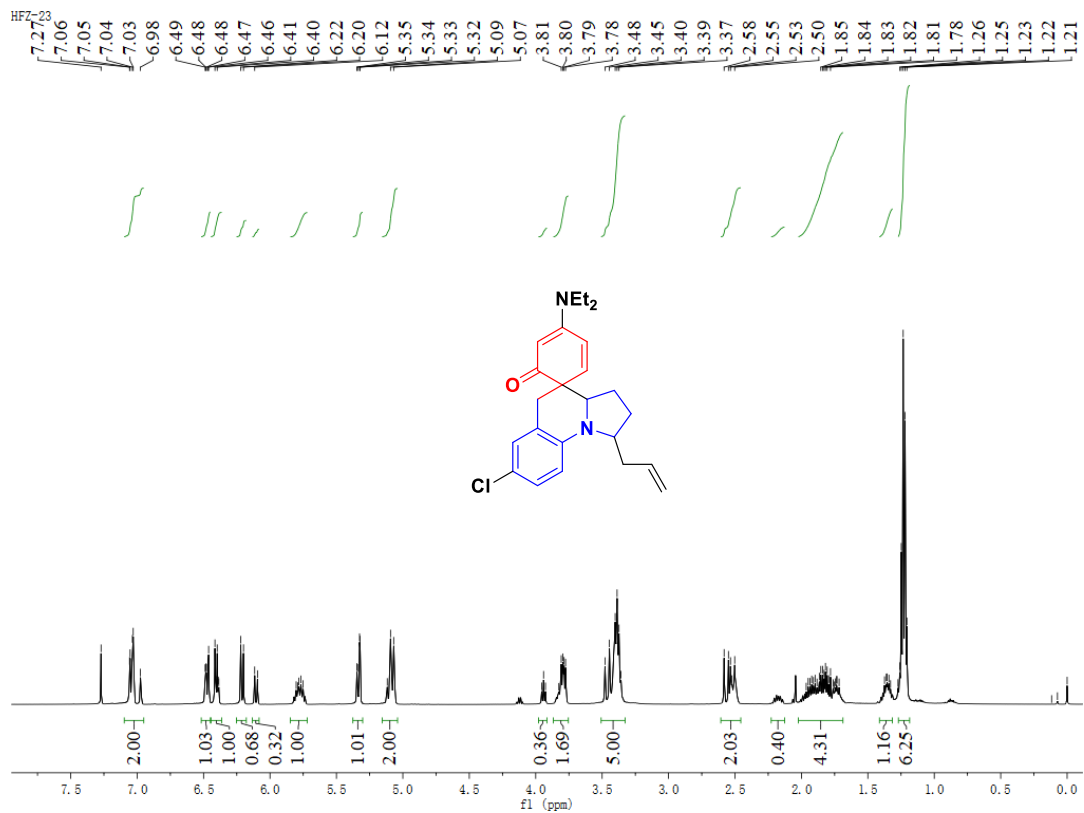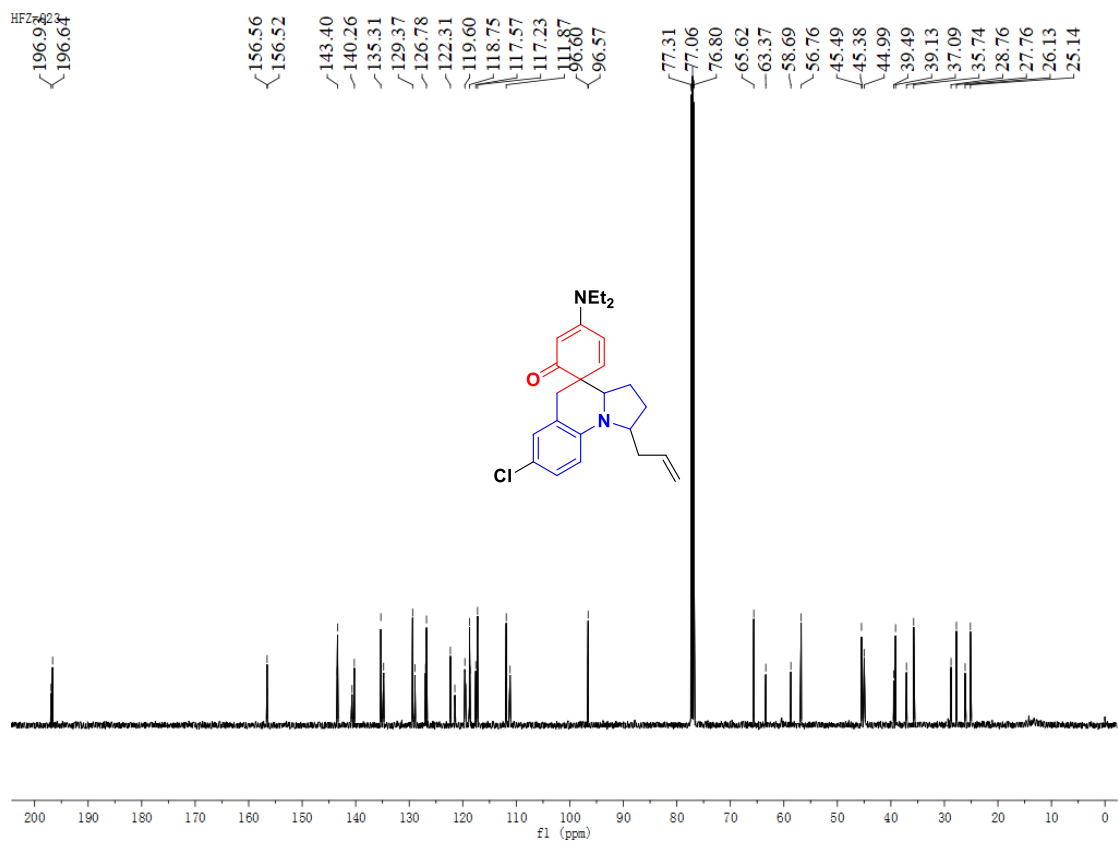



**1'-allyl-4-(diethylamino)-6'-fluoro-1',2',3',3a'-tetrahydro-5'H-spiro[cyclohexane-1,4'-pyrrolo[1,2-a]quinoline]-2,4-dien-6-one (4e)**

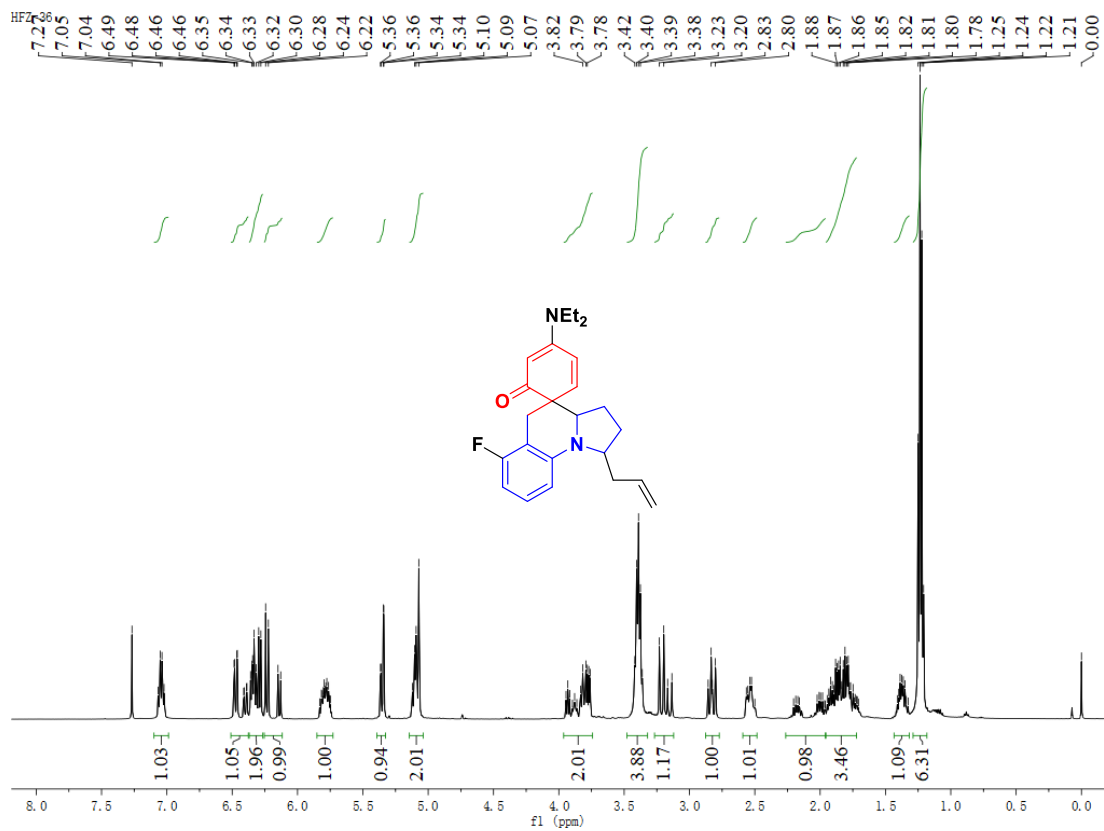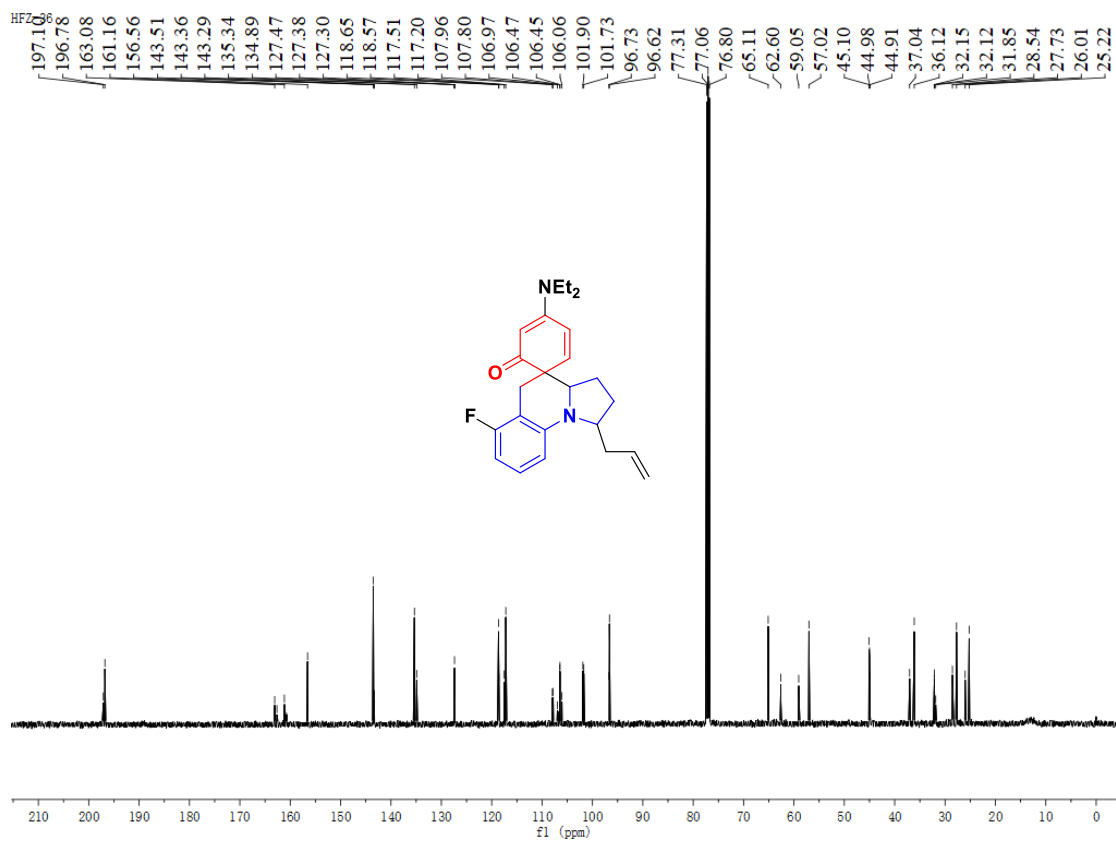

**1'-allyl-6'-chloro-4-(diethylamino)-1',2',3',3a'-tetrahydro-5'H-spiro[cyclohexane-1,4'-pyrrolo[1,2-a]quinoline]-2,4-dien-6-one (4f)**

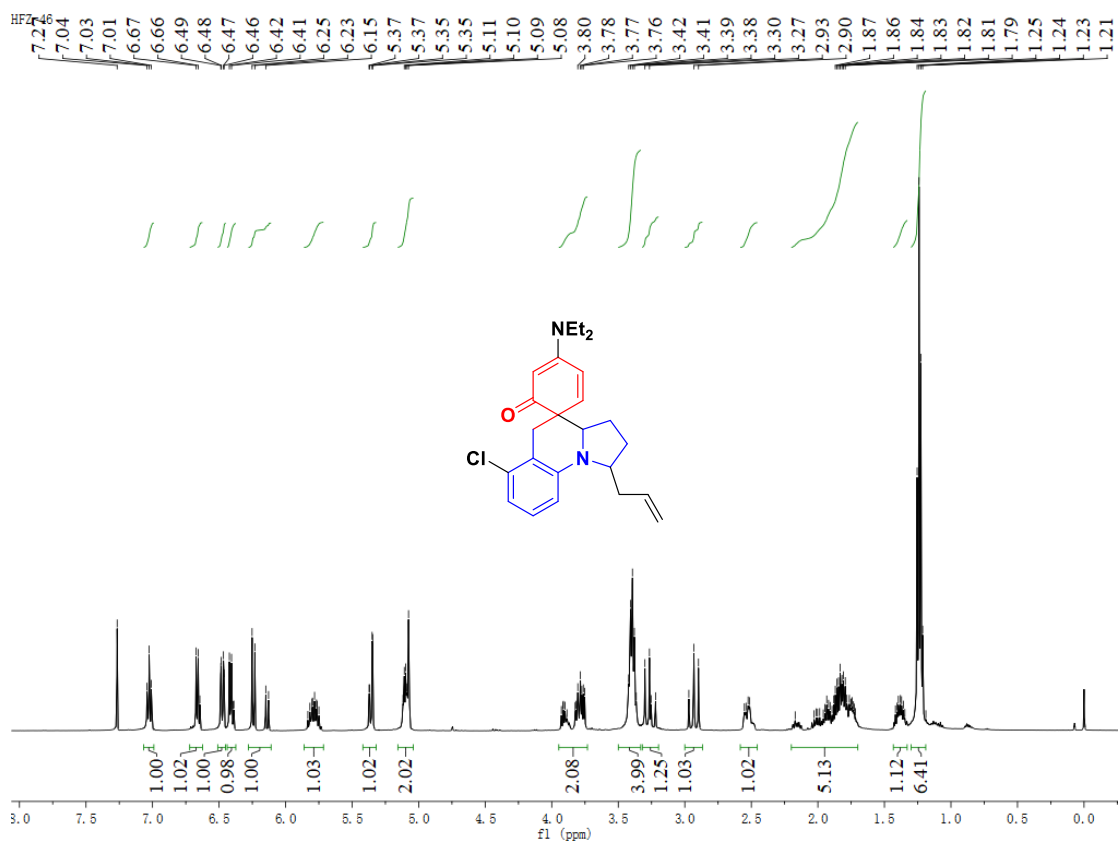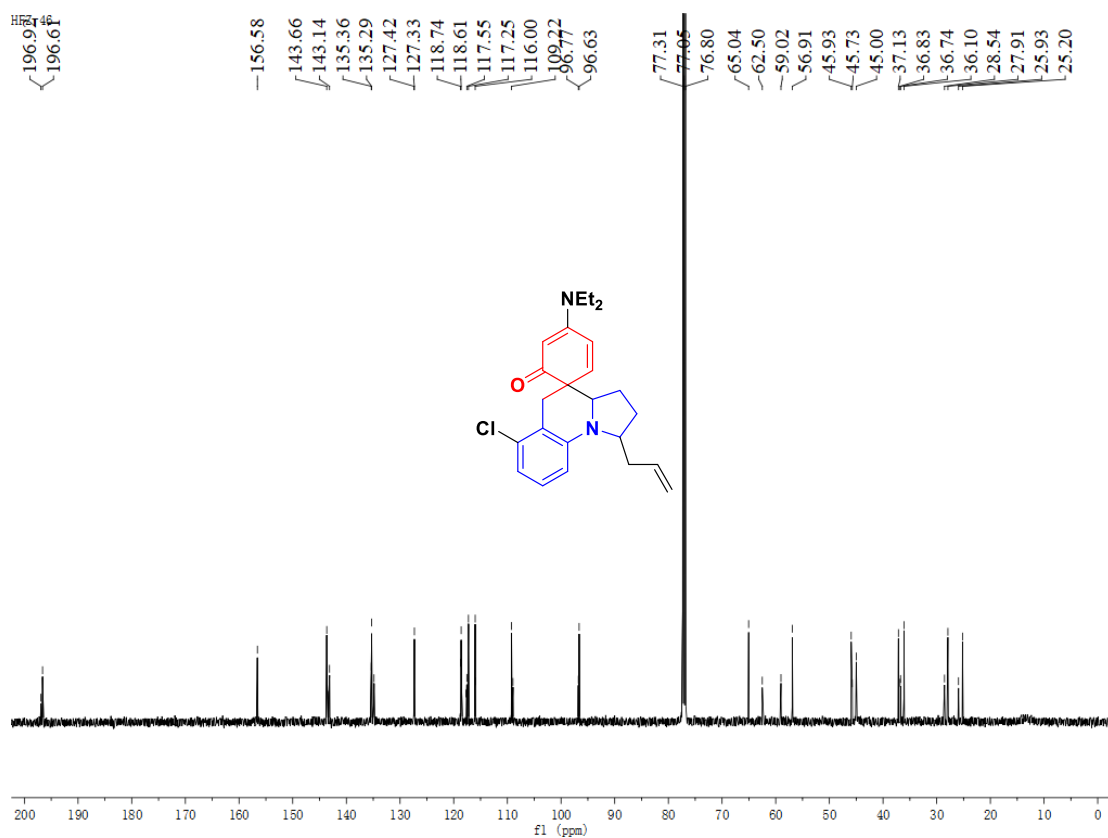

**1'-allyl-6'-bromo-4-(diethylamino)-1',2',3',3a'-tetrahydro-5'H-spiro[cyclohexane-1,4'-pyrrolo[1,2-a]quinoline]-2,4-dien-6-one (4g)**

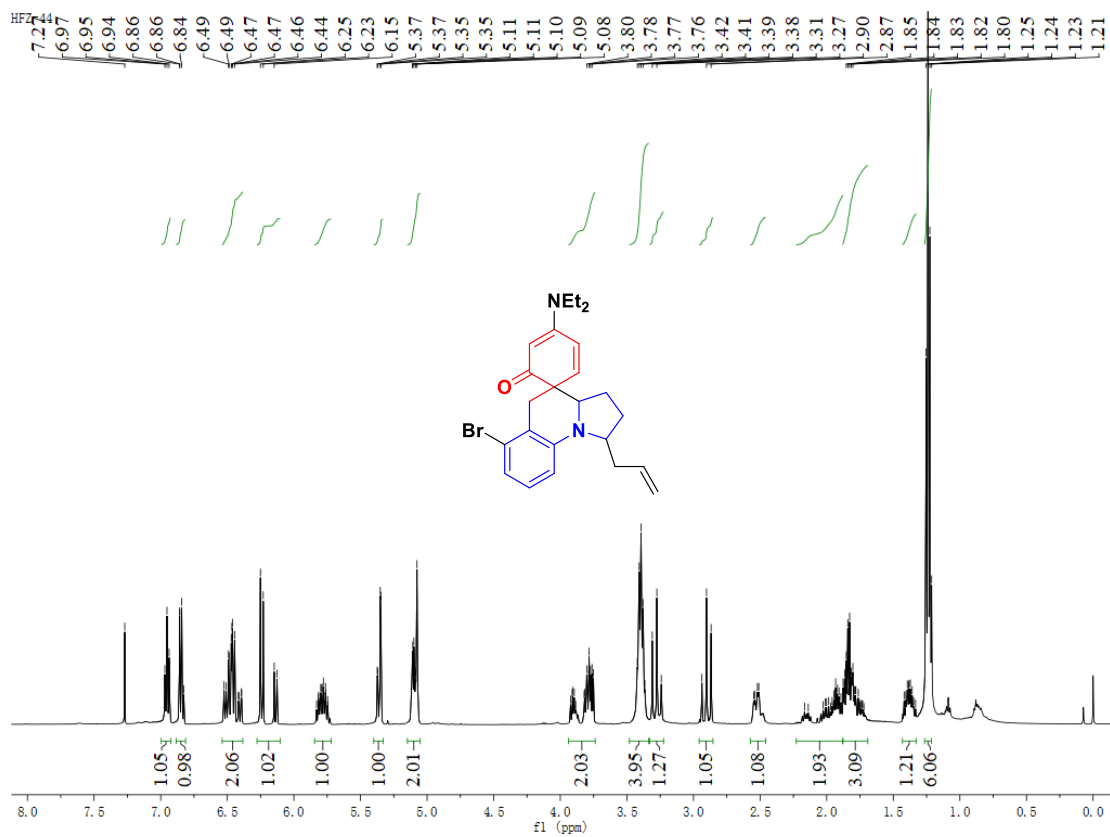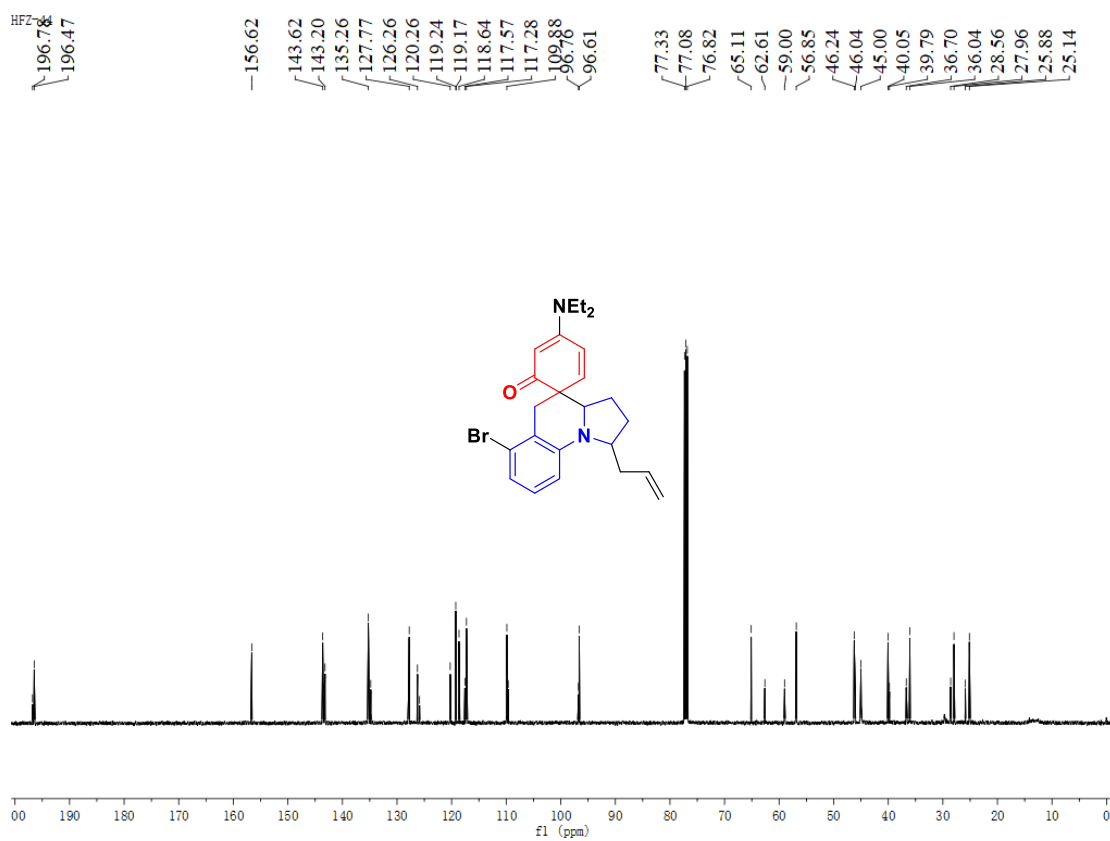

**11'-allyl-4-(diethylamino)-6a',6b',7',8',9',10',10a',11'-octahydro-5'H-spiro[cyclohexane-1,6'-isoindolo[2,1-a]quinoline]-2,4-dien-6-one (4h)**

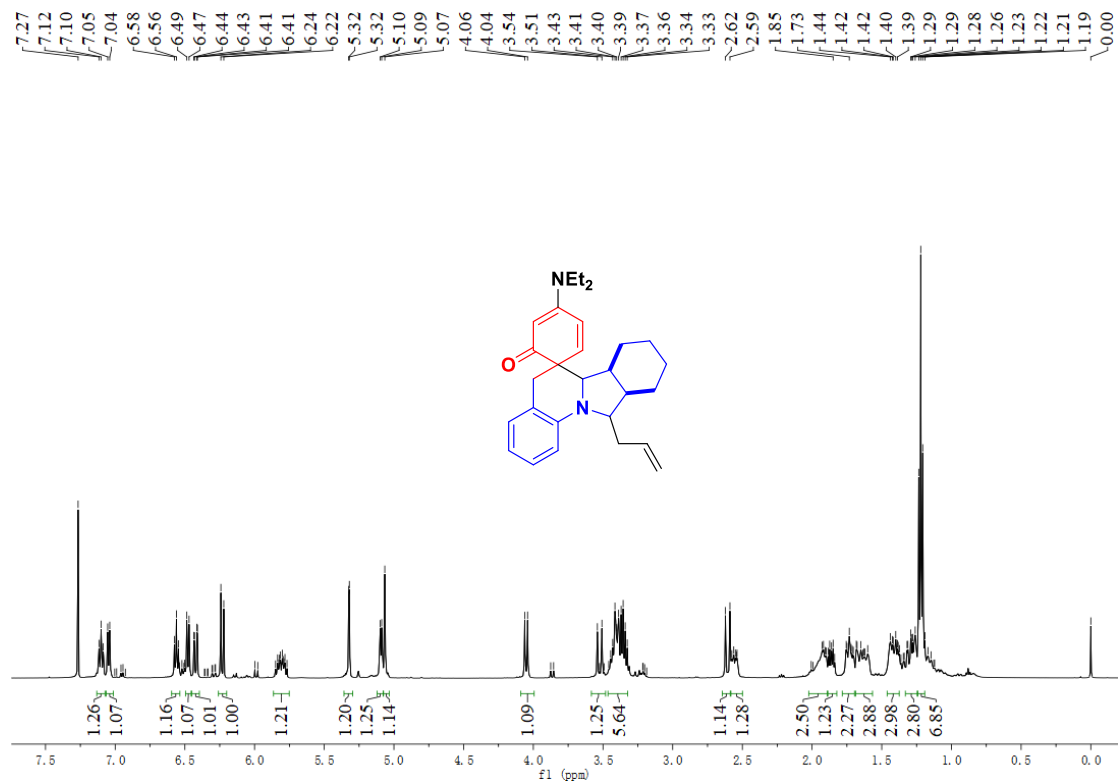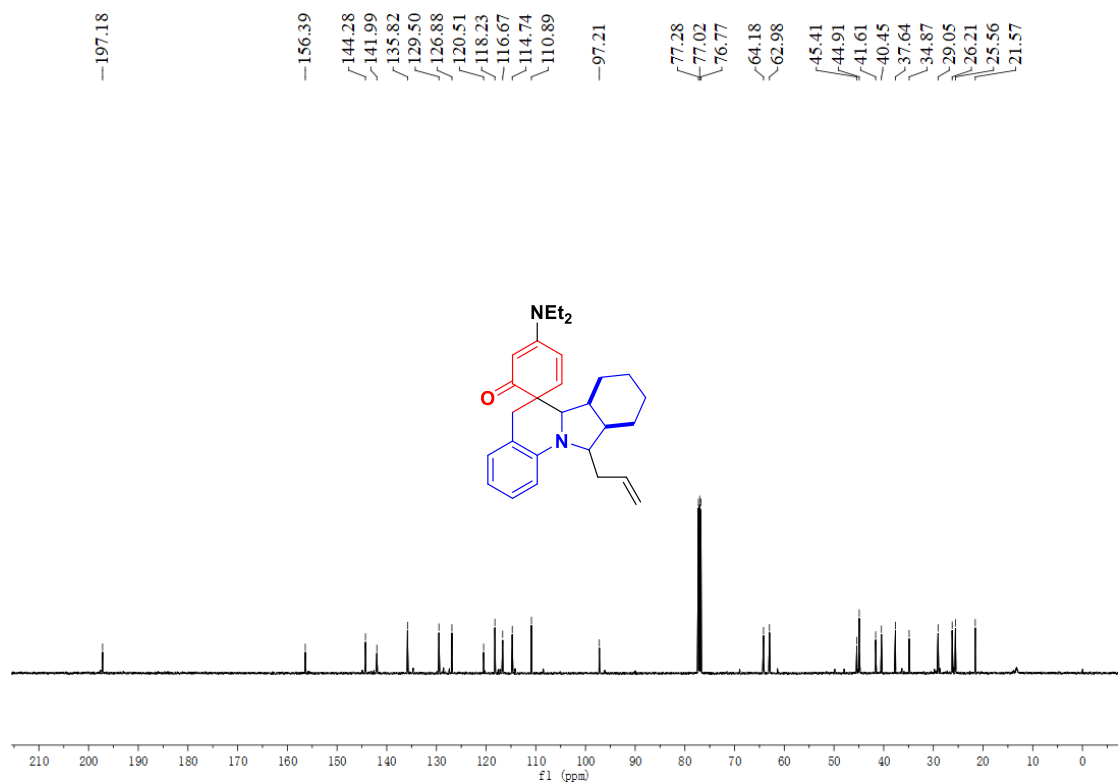

**7'-chloro-4-(diethylamino)-1'-methyl-1',2',3',3a'-tetrahydro-5'H-spiro[cyclohexane-1,4'-pyrrolo[1,2-a]quinoline]-2,4-dien-6-one (4i)**

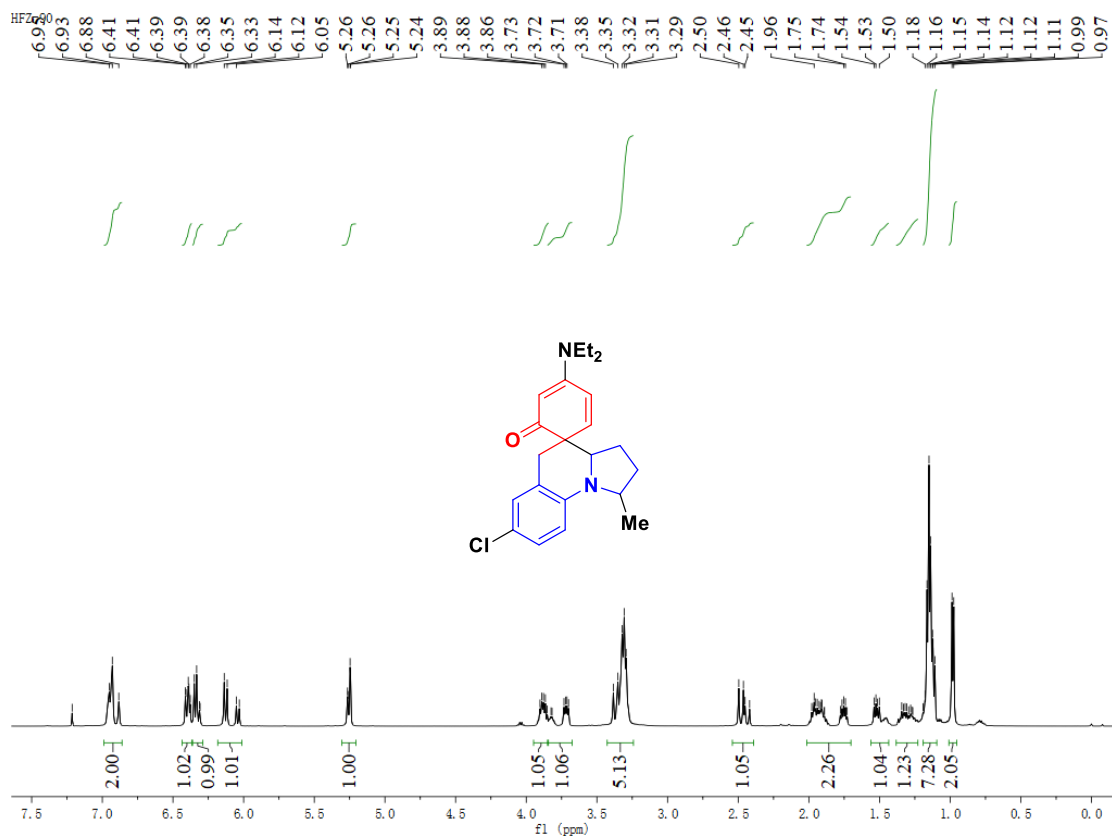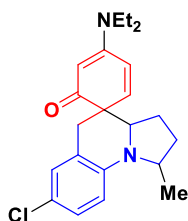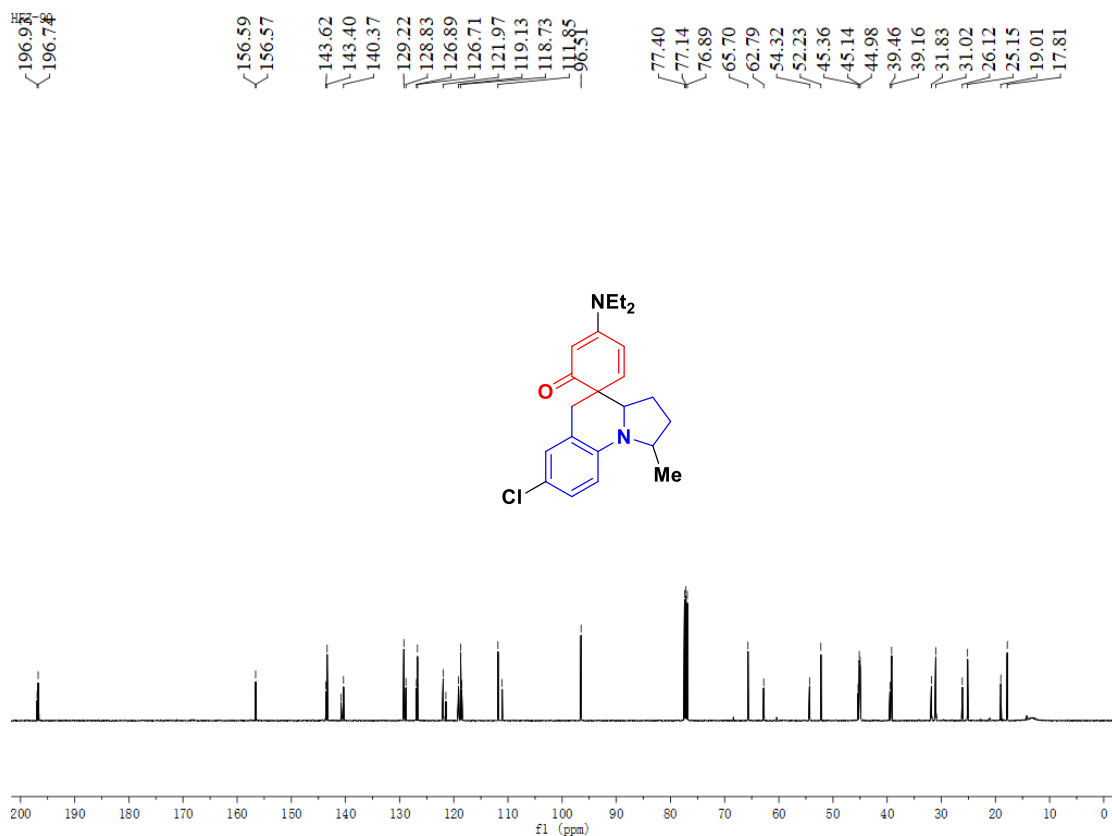

HFZ-90

143.62  
143.40  
129.21  
128.83  
126.89  
126.71  
118.73  
118.54  
111.85  
111.08  
96.50  
65.69  
62.78  
54.32  
52.23

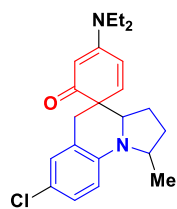

DEPT 90

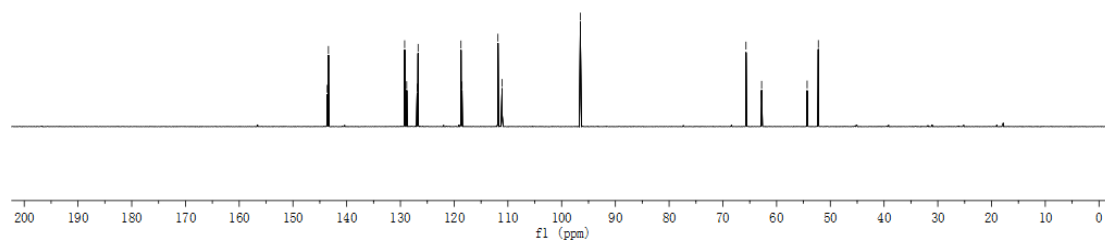

**7'-chloro-4-(diethylamino)-1'-phenyl-1',2',3',3a'-tetrahydro-5'H-spiro[cyclohexane-1,4'-pyrrolo[1,2-a]quinoline]-2,4-dien-6-one (4j)**

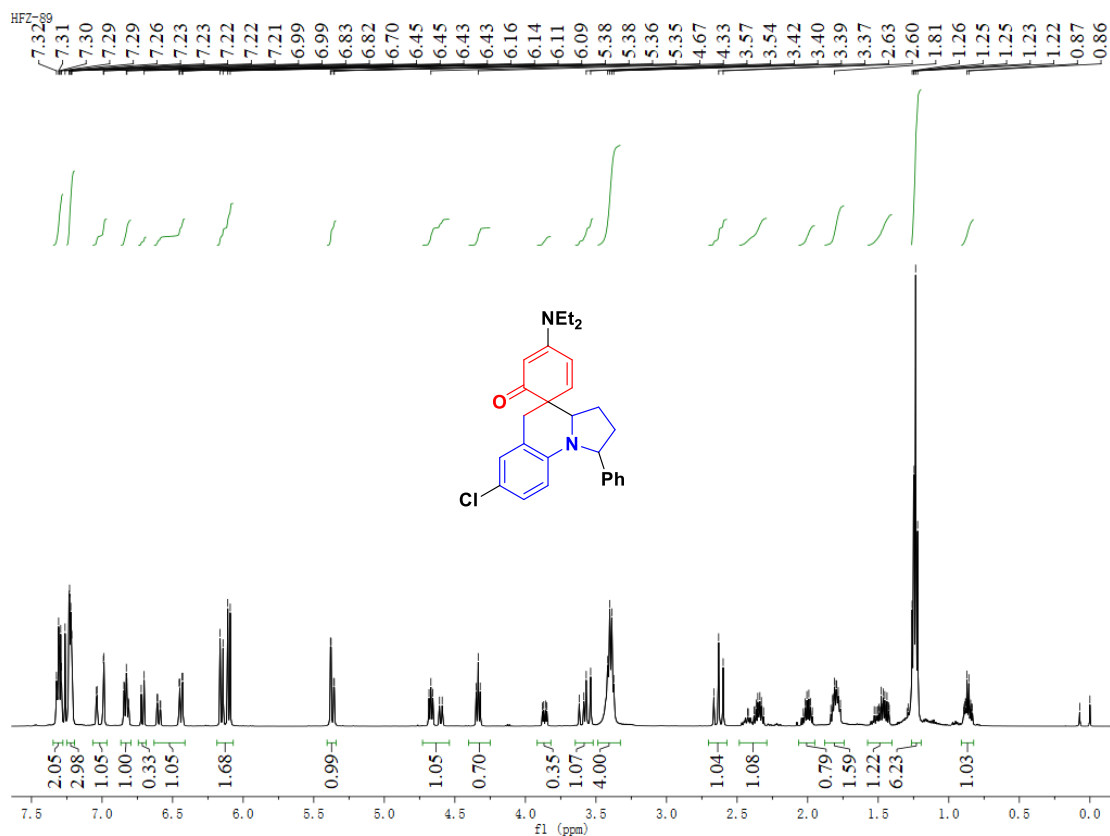

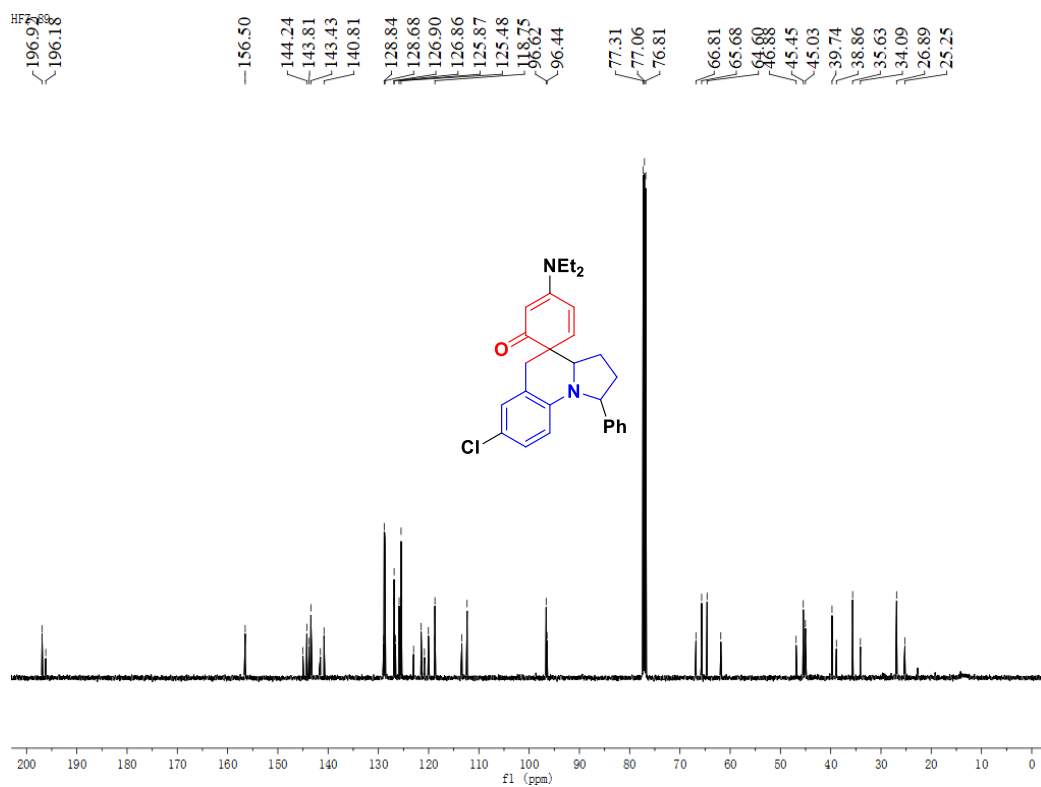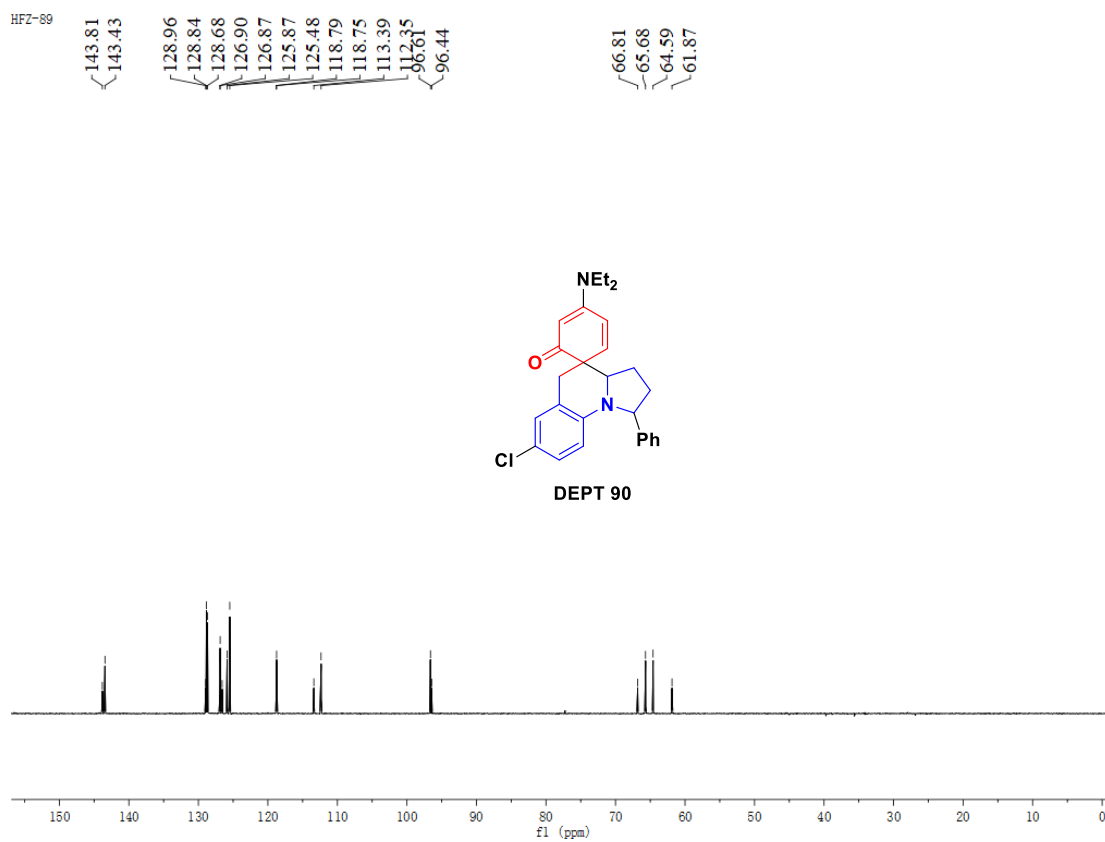

**1'-allyl-4-(pyrrolidin-1-yl)-1',2',3',3a'-tetrahydro-5'H-spiro[cyclohexane-1,4'-pyrrolo[1,2-a]quinoline]-2,4-dien-6-one (4k)**

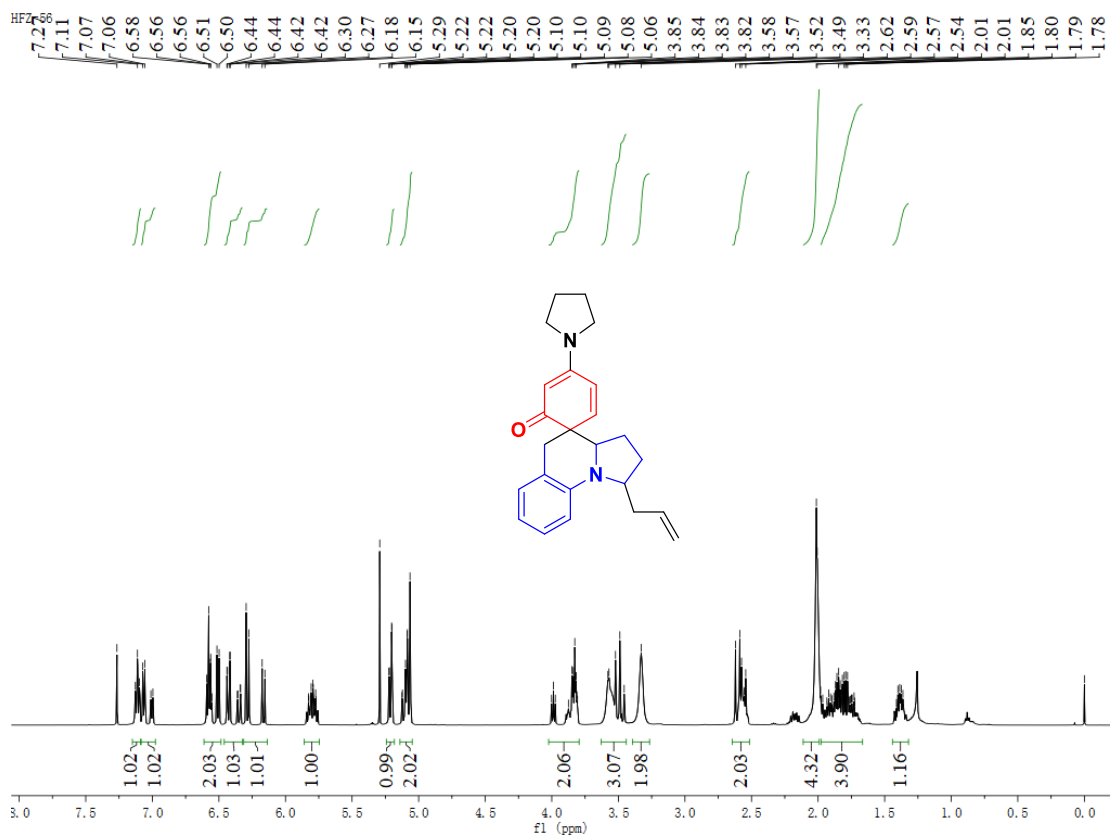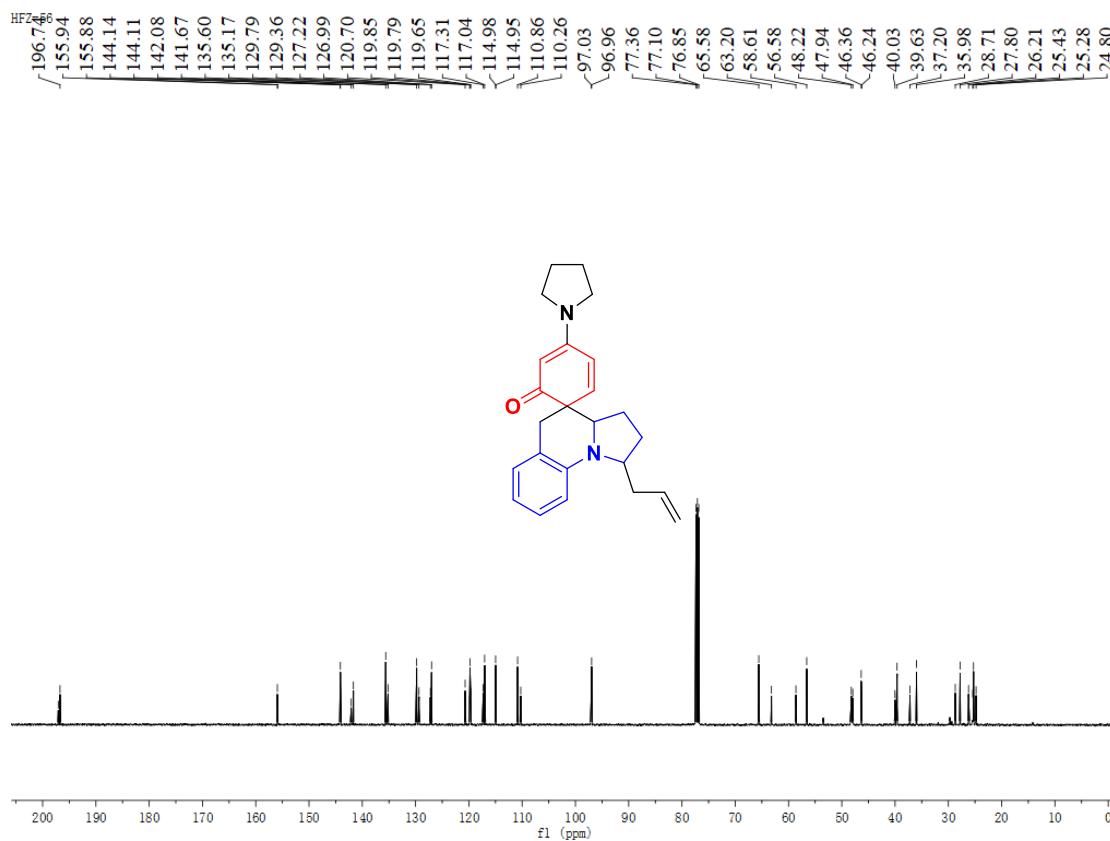



**6-(2-(pyrrolidin-1-yl-2-d)benzyl)benzo[d][1,3]dioxol-5-ol (5a)**

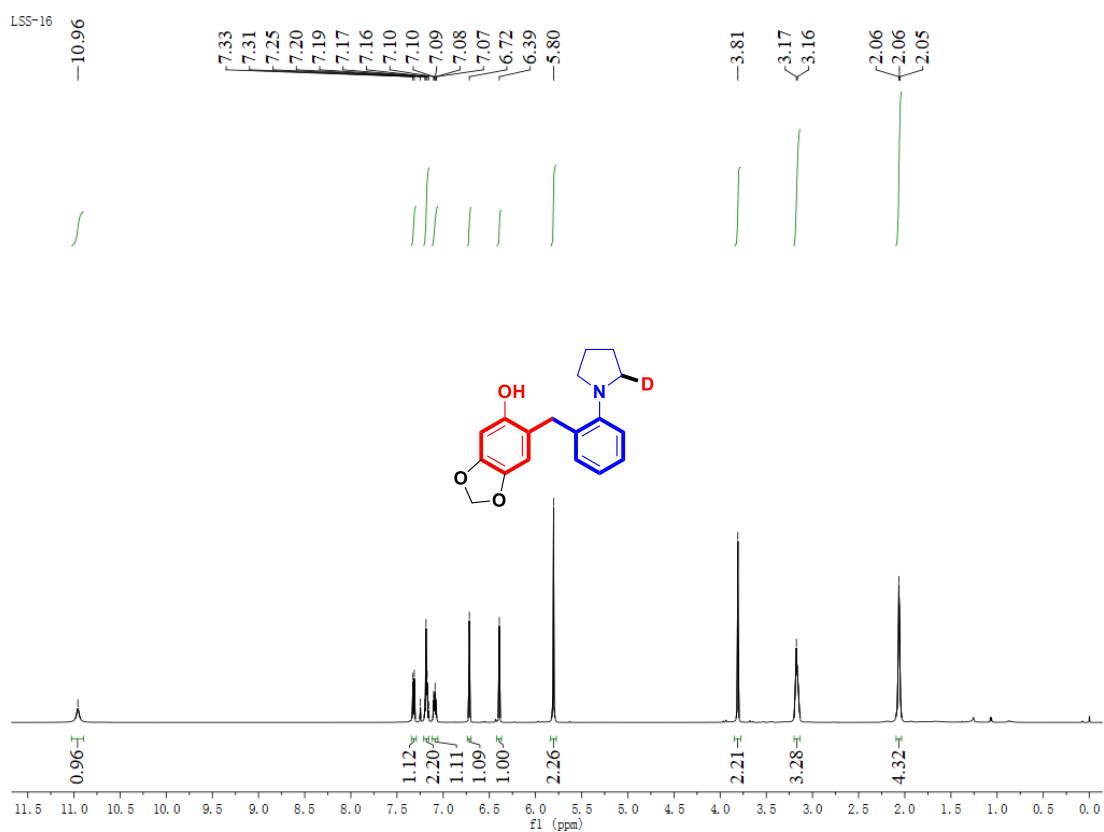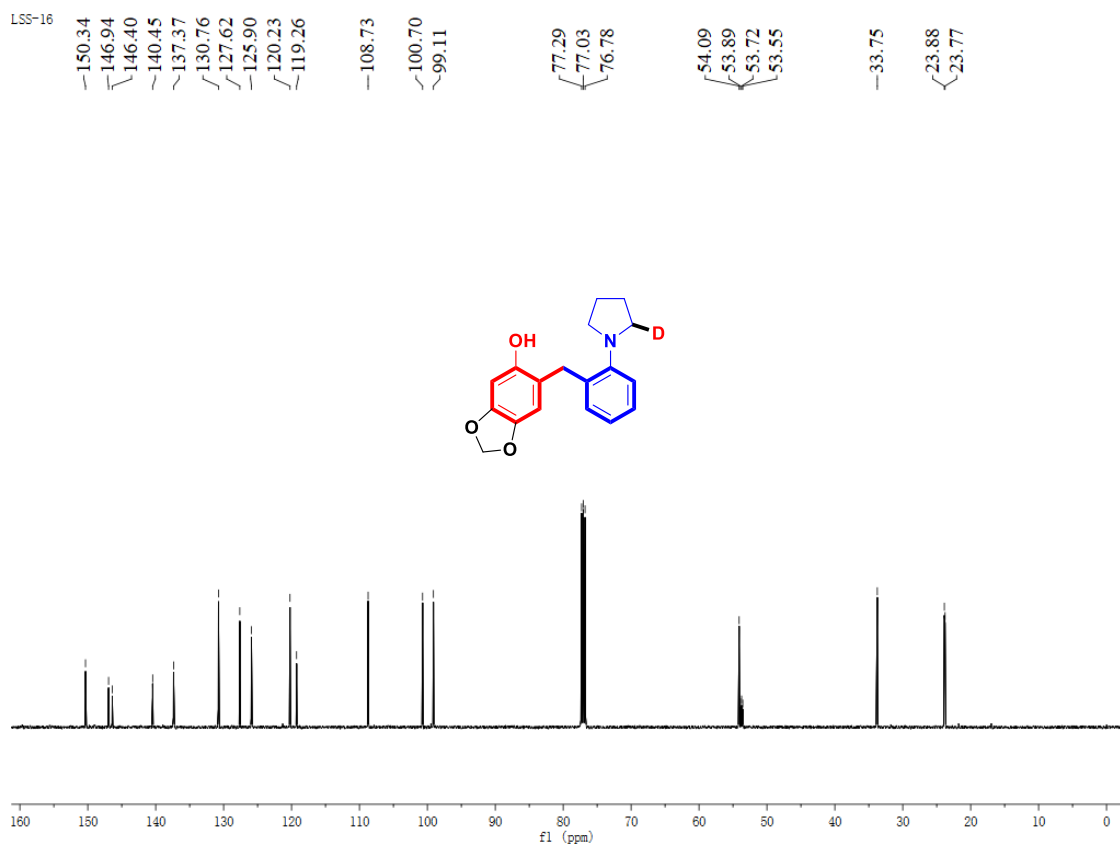

5-(diethylamino)-2-(2-(pyrrolidin-1-yl-2-d)benzyl)phenol (5b)

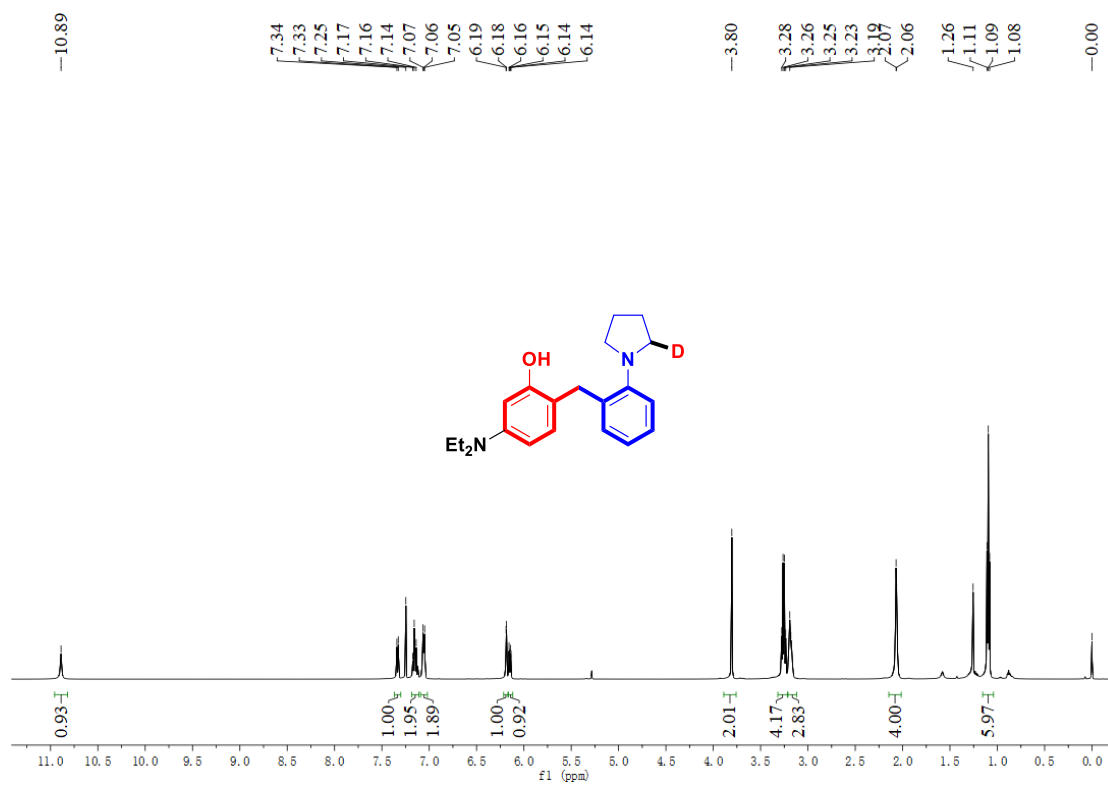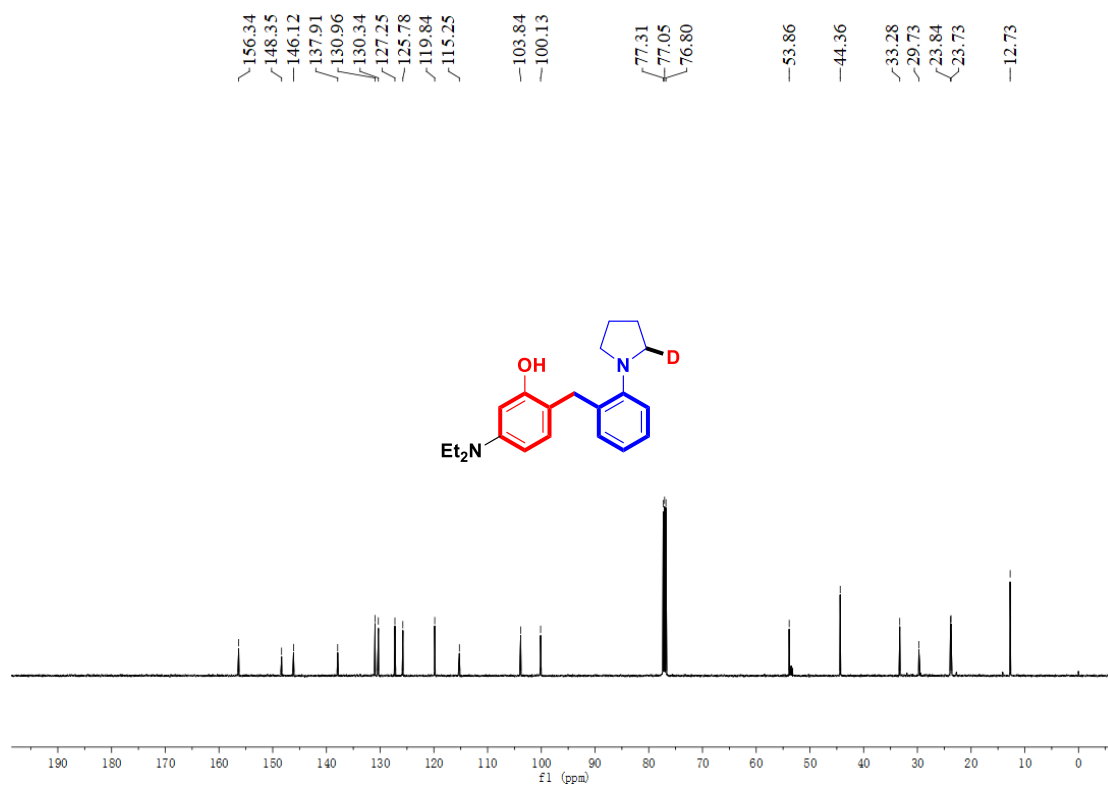

**5-(diethylamino)-2-(3-fluoro-2-(pyrrolidin-1-yl-2-d)benzyl)phenol (5c)**

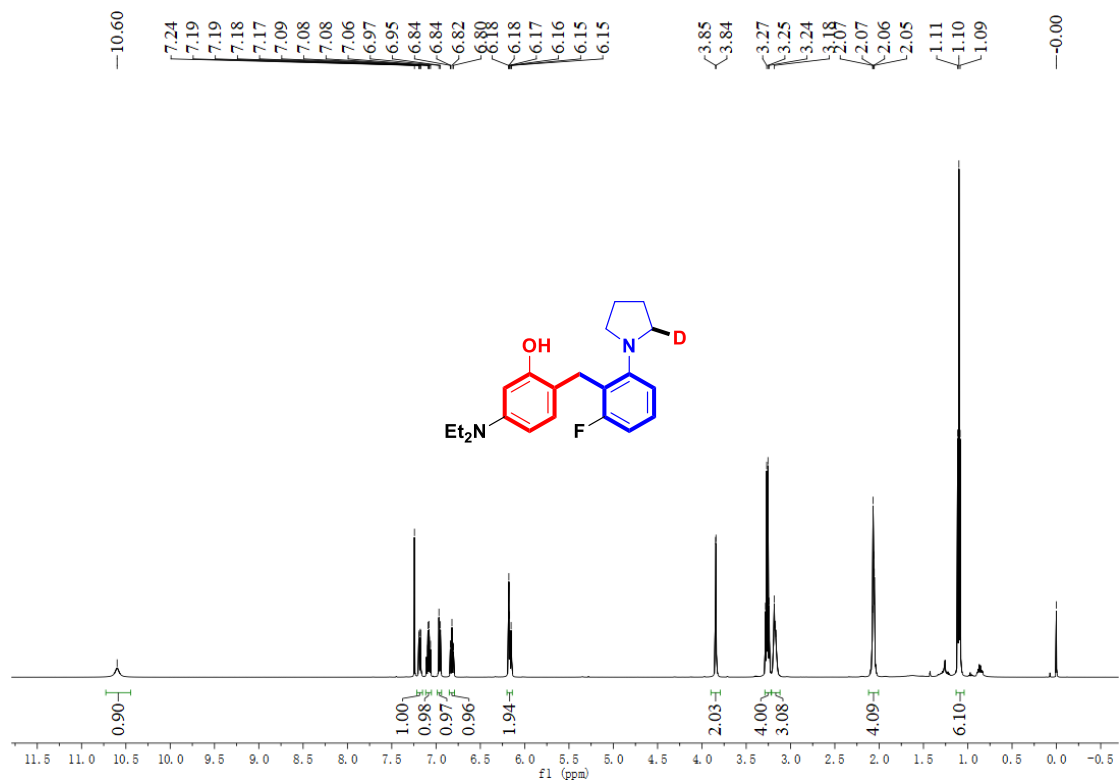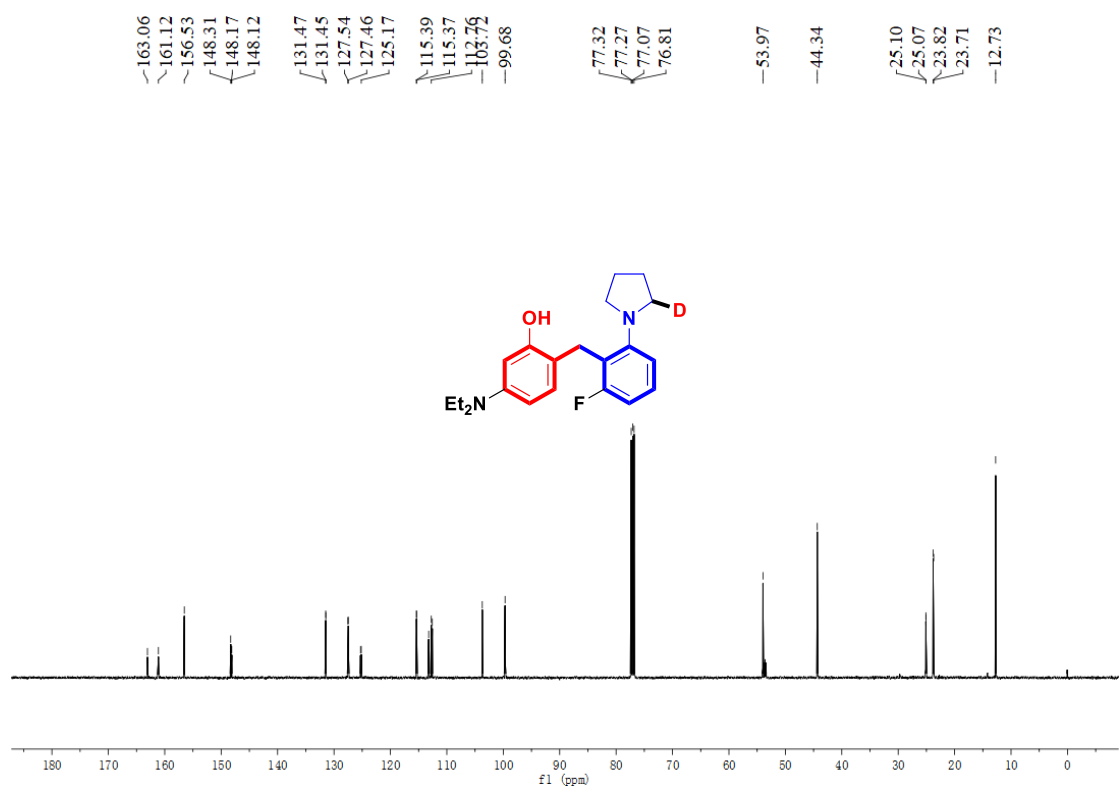

**2-(2-(2-allylpyrrolidin-1-yl-5-d)-4-methylbenzyl)-5-(diethylamino)phenol (5d)**

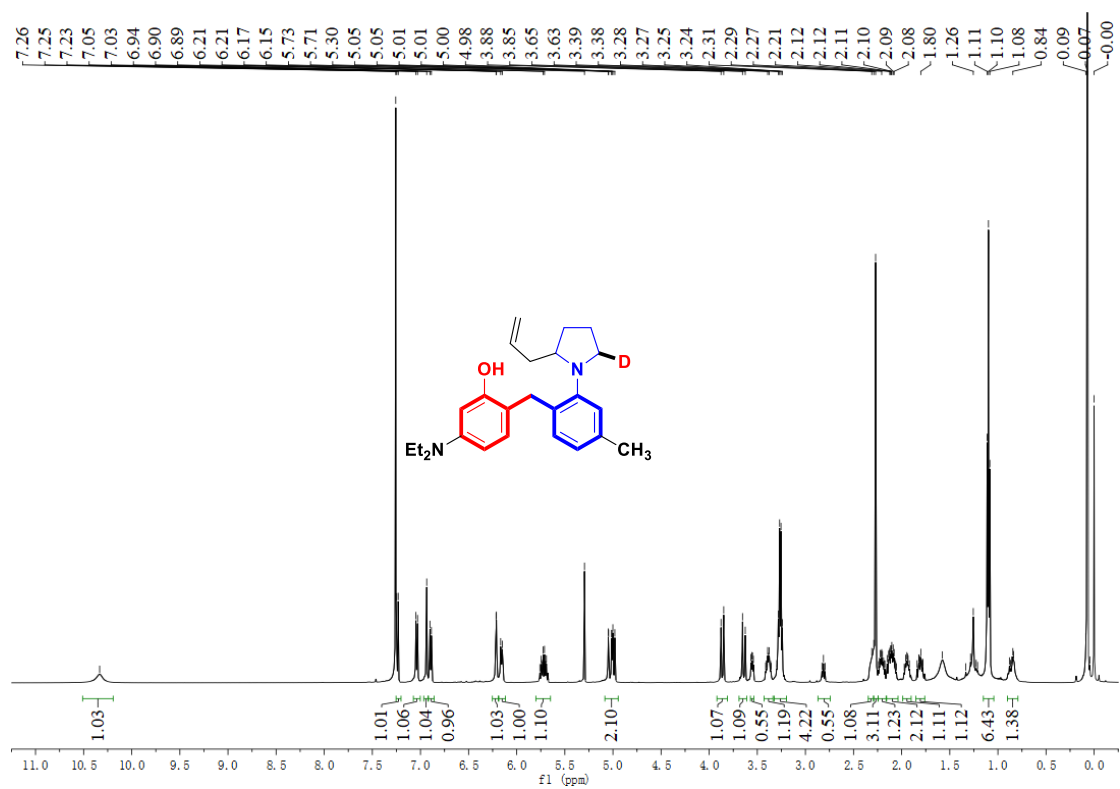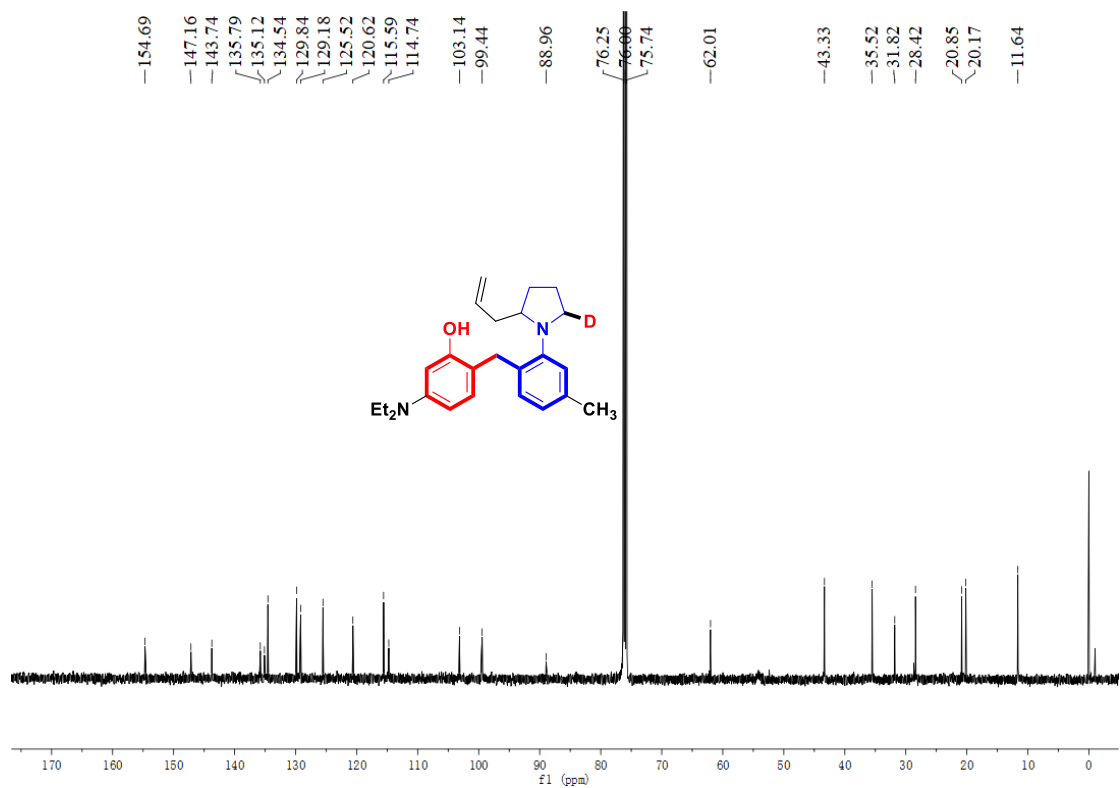

**2-(3-chloro-2-(2,5-diallylpyrrolidin-1-yl)benzyl)-5-(diethylamino)phenol (6f)**

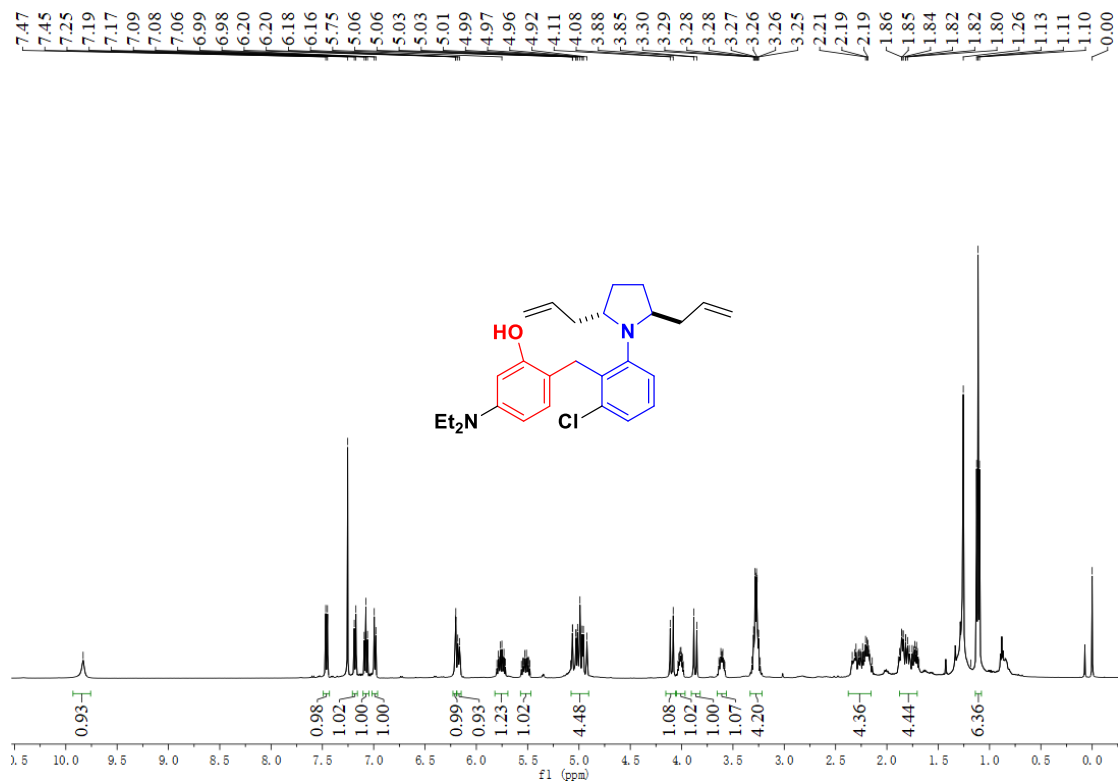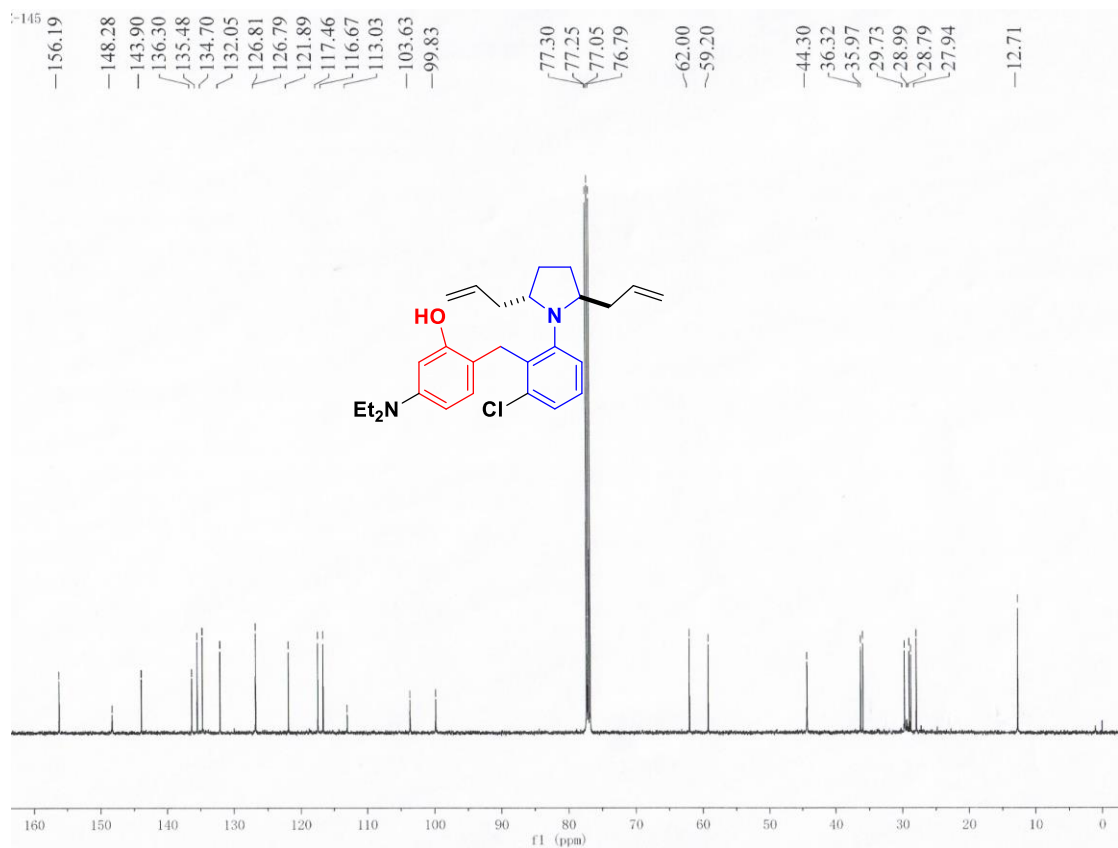

**5-methoxy-3-(2-(pyrrolidin-1-yl)benzyl)-1H-indole (7)**

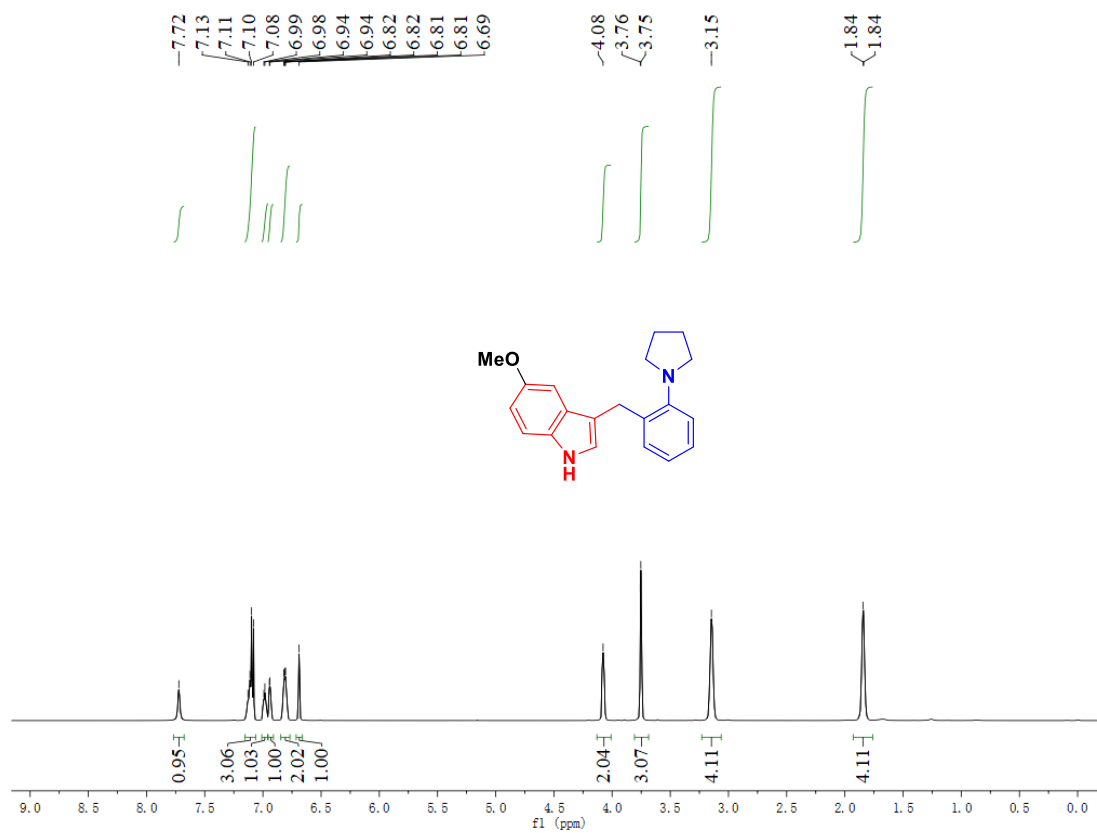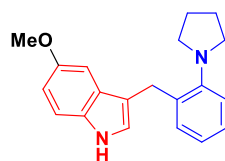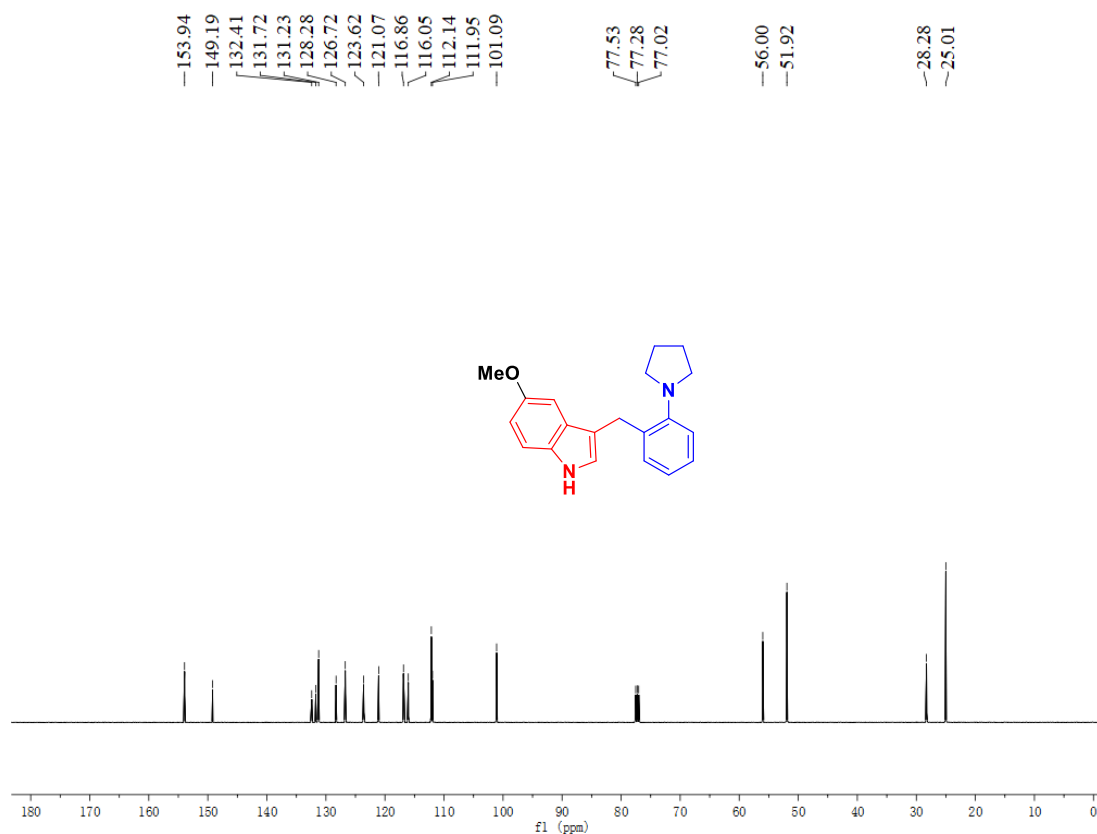

**5-methoxy-1',2',3',3a'-tetrahydro-5'H-spiro[indole-3,4'-pyrrolo[1,2-a]quinoline] (11)<sup>[4]</sup>**

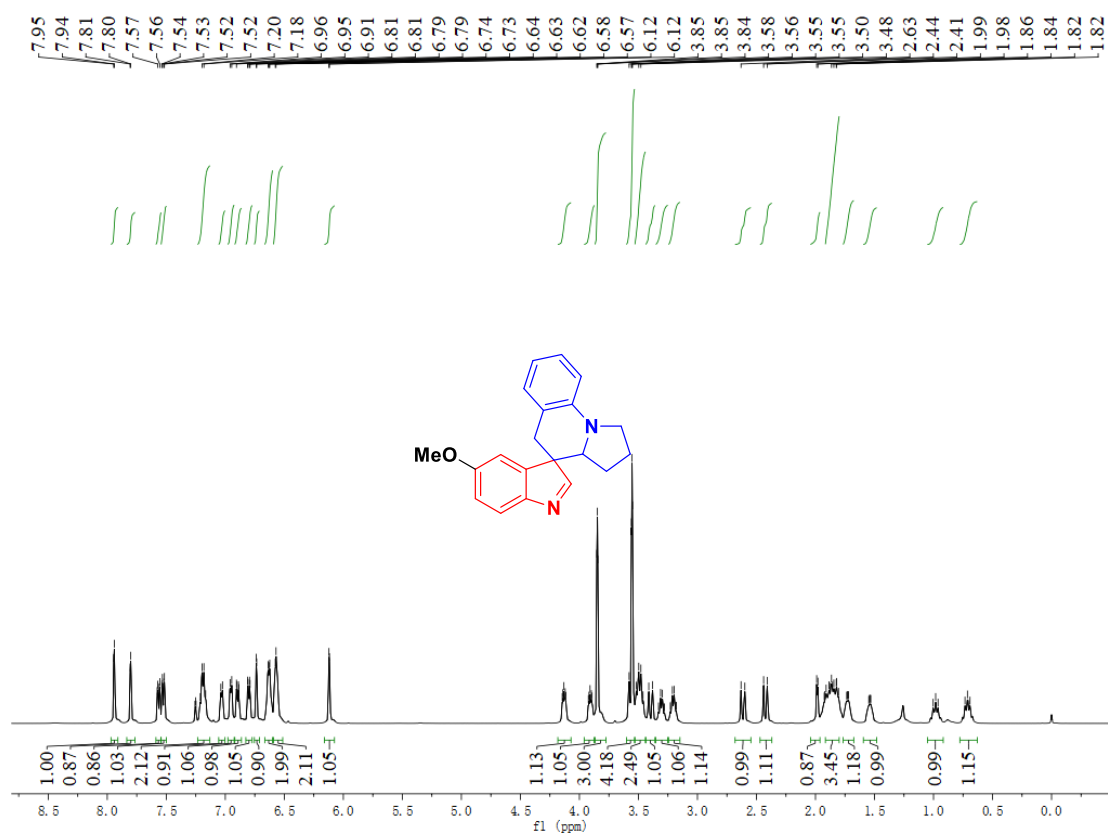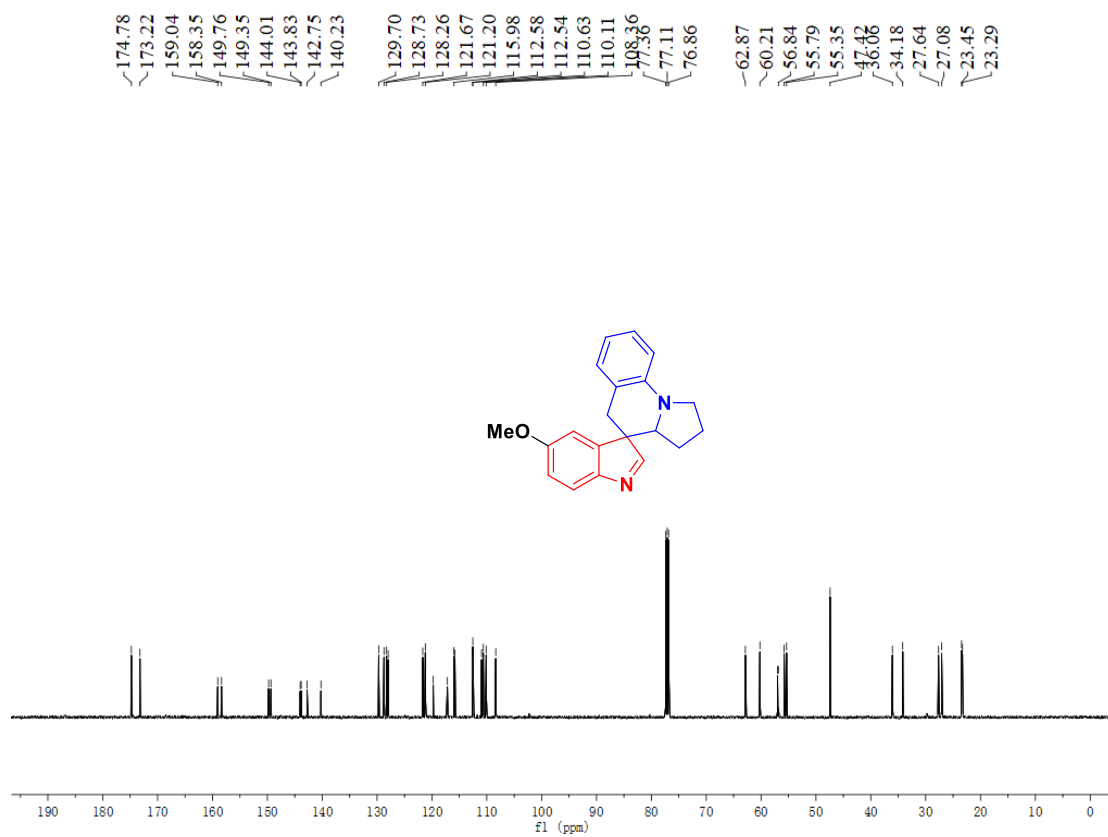

**2-allyl-5-methoxy-1',2',3',3a'-tetrahydro-5'H-spiro[indoline-3,4'-pyrrolo[1,2-a]quinoline] (12)**

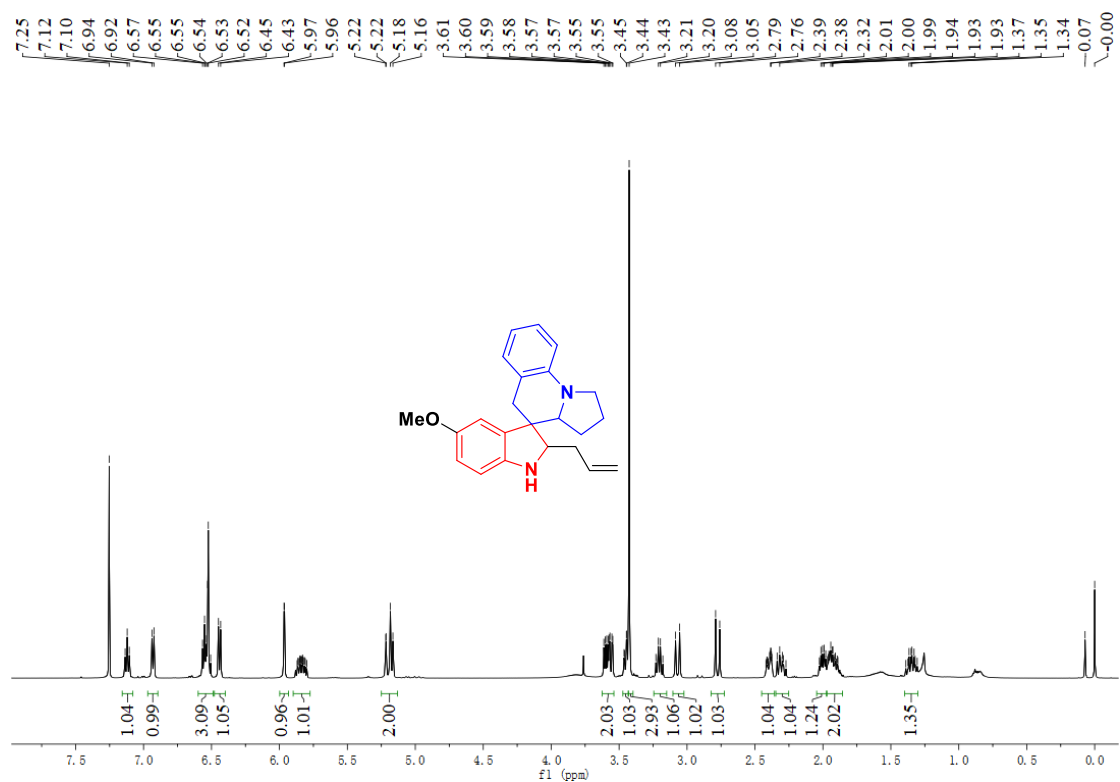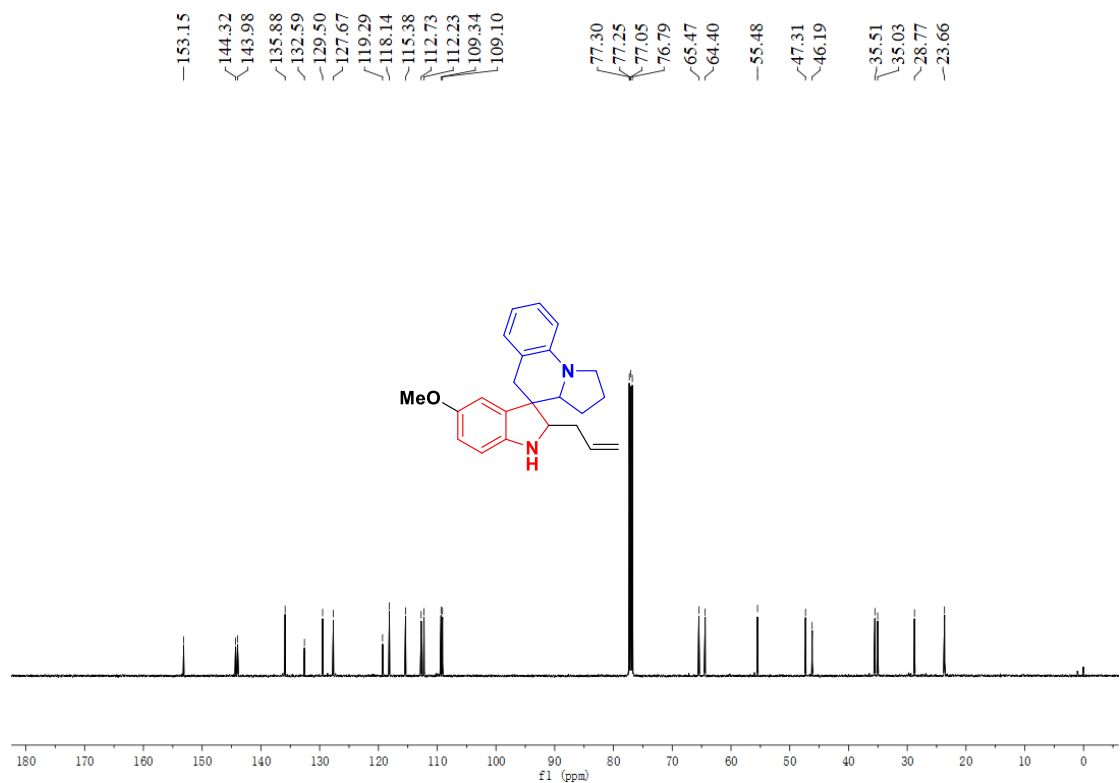

Supplement: d1gc00941a1.pdf [file d1gc00941a1.pdf]
